# Supplementary material for: Synergistic effects within a C2-symmetric organocatalyst: the potential formation of a chiral catalytic pocket
Source: Royal Society of Chemistry journal article supplement (doi:10.1039/c3ob27250h), 2013-01-01
Supplement: c3ob27250h.pdf [file c3ob27250h.pdf]

## Extending on C<sub>2</sub>-Symmetric Organocatalysts – correlating catalytic activity with molecular architecture in the direct asymmetric aldol reaction

Joshua Delaney<sup>a</sup>, Hannah Brozinski<sup>a</sup>, Dr. Luke Henderson<sup>\*a</sup>

### ELECTRONIC SUPPLEMENTARY INFORMATION

- S2 – General Experimental and Equipment
- S3 – Experimental
- S21 – Determination of reaction outcomes
- S23 – HPLC of chiral products and racemic examples.
- S74 – Evaluation of diprolineamides 1-5: Alternate aldehydes
- S75 – Evaluation of diprolineamides 1-5: Alternate ketones
- S76 – References

## General Experimental

All  $^1\text{H}$  and  $^{13}\text{C}$  NMR spectra were recorded on a Jeol JNM-EX 270 MHz, Jeol JNM-EX 400 MHz or Bruker Avance III 500 MHz as indicated. Samples were dissolved in deuterated chloroform ( $\text{CDCl}_3$ ) or deuterated methanol ( $\text{CD}_3\text{OD}$ ) with the residual solvent peak used as an internal reference ( $\text{CDCl}_3$ :  $\delta_{\text{H}} = 7.26$  ppm;  $\text{CD}_3\text{OD}$ :  $\delta_{\text{H}} = 3.31$  ppm). Proton spectra are reported as follows: chemical shift  $\delta$  (ppm), [integral, multiplicity (s = singlet, br s = broad singlet, d = doublet, dd = doublet of doublets, ddd = doublet of doublets of doublets, t = triplet, dt = doublet of triplets, ddt = doublet of doublets of triplets, tt = triplet of triplets, q = quartet, m = multiplet), coupling constant  $J$  (Hz), assignment].

Thin Layer Chromatography (TLC) was performed using aluminium-backed Merck TLC Silica gel 60 F254 plates, and samples were visualised using 254 nm ultraviolet (UV) light, potassium permanganate/potassium carbonate oxidising dip (1:1:100  $\text{KMnO}_4$ : $\text{K}_2\text{CO}_3$ : $\text{H}_2\text{O}$  w/w), or cerium-ammonium-molybdate (CAM) stain (1:2.5:100 Cerium ammonium sulphate dehydrate: Ammonium Molybdate:  $\text{H}_2\text{SO}_4$  (10% w/w)).

Column Chromatography was performed using silica gel 60 (70-230 mesh). All solvents used were AR grade. Specialist reagents were obtained from Sigma-Aldrich Chemical Company and used without further purification. Petroleum spirits refers to the fraction boiling between 40-60 °C.

Chiral HPLC was performed with a 1200 series Agilent. Separation of stereoisomers was carried out with a Diacel Chiralpak AD-H chiral column (0.46 cm  $\times$  25 cm). Retention times were reported at ambient temp (24 °C) with an injection volume of 20  $\mu\text{L}$  at a flow rate of 1 mL/min. A mobile phase of 10% isopropanol/ 90% hexane was used.

HRMS was found via a 6210 MSD TOF mass spectrometer under the conditions: gas temperature (350 °C), vaporizer (28 °C), capillary voltage (3.0 kV), cone voltage (40 V), nitrogen flow rate (7.0L/min), nebuliser (15 psi). Samples were dissolved in MeOH.

Specific rotation  $[\alpha]_{\text{D}}$  was obtained using a JASCO DIPP Digital Polarimeter. Compounds were dissolved in  $\text{CHCl}_3$  where indicated. Rotation was measured at  $\lambda = 584$  nm and reported with the units  $10^{-1} \text{ } ^\circ\text{C cm}^2\text{g}^{-1}$ .

ATR-FTIR measurements were conducted using an Alpha FTIR spectrometer (Bruker Optik GmbH, Ettlingen, Germany) equipped with a deuterated triglycine sulfate (DTGS) detector and a single-reflection diamond ATR sampling module (Platinum ATR QuickSnap™). All absorption bands are reported in wavenumbers ( $\text{cm}^{-1}$ ) and signals are reported as weak (w), medium (m), strong (s) and/or broad (br). Background spectra of a clean ATR surface were acquired prior to each sample measurement using the same acquisition parameters

Melting points were found on a Stuart Scientific Melting Point Apparatus SMP3, v. 5 and are uncorrected.

## Experimental

### *trans*-4-*tert*butyldiphenylsiloxy-L-proline

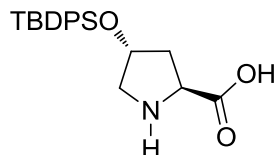

*Trans*-4-hydroxy-L-proline (1.0 g, 0.763 mmol) was added to acetonitrile (20 mL) and stirred. TBDPS-Cl (6.94 mL, 0.026 mol) was added to the stirring solution and the reaction was cooled to 0 °C. DBU (4.22 mL, 0.028 mol) was subsequently added to the stirring solution and the mixture was allowed to reach room temperature and stirred for 24 hrs. The resulting reaction mixture was then quenched with hexane and the product was extracted into hexane (3 × 30 mL). The combined hexane layers were combined and the solvent was removed *in vacuo*. The resulting oil was redissolved in a methanol (32 mL), THF (18 mL), water (16 mL) and 2M NaOH (24 mL) mixture and allowed to stir for 90 mins at room temperature. The solution was then titrated to a pH of 6 with 2M HCl before removing the organic solvents under reduced pressure. To the resulting water layer a 1:1 ratio of Et<sub>2</sub>O was added and the biphasic mixture was allowed to stand for 24h, resulting in crystals forming in the organic phase. The solid was filtered and washed with cold Et<sub>2</sub>O to give the silylated intermediate as white crystals (2.71 g, 0.733 mol, 96%). <sup>1</sup>H NMR (400 MHz, CD<sub>3</sub>OD) δ 7.67-7.64 (m, 4H, aryl), 7.45-7.42 (m, 6H, aryl), 4.59 (s, *J* = 0.27, 1H, chiral), 4.23 (1H, chiral), 3.30 (dd, *J* = 10.8, 5.4 Hz, 1H, N-CH<sub>2</sub>), 3.29 (dt, *J* = 13.5, 2.7 Hz, 1H, N-CH<sub>2</sub>), 2.31 (ddt, *J* = 13.5, 7.56, 1.88 Hz, 1H, CH-CH<sub>2</sub>-CH), 1.93 (ddd, *J* = 13.5, 9.99, 4.05 Hz, 1H, CH-CH<sub>2</sub>-CH), 1.08 (9H, *t*-butyl). Compound was identified by <sup>1</sup>H NMR and was consistent with literature values.<sup>1</sup>

### *trans*-N-Boc-4-*tert*butyldiphenylsiloxy-L-proline 7

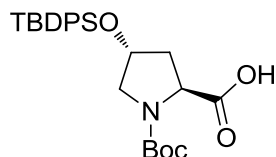

TBDPS-Proline (2.71 g, 0.7337 mmol) was dissolved in a 1:1 ratio of THF/H<sub>2</sub>O (20 mL : 20 mL). To this mixture was added NaOH (0.733 g, 0.018 mol) along with Boc<sub>2</sub>O (2.08 g, 0.953 mmol) and the solution was stirred for 16 h at room temperature. The resulting solution was then acidified with 2M HCl and extracted into Diethyl Ether (3 × 20 mL). The combined organic phase was dried over MgSO<sub>4</sub> and the solvent was removed *in vacuo* to afford clear viscous oil. The crude mixture was purified *via* flash chromatography (1/4 EtOAc : Pet spirits) to give the pure monomer as a colourless oil (2.82 g, 0.6 mol, 82%). <sup>1</sup>H NMR (400 MHz, CDCl<sub>3</sub>) δ (ppm) 7.64 (m, 4H, Alkyl), 7.39 (m, 6H, Alkyl), 4.56 (t, *J* = 8 Hz, 1H, Chiral), 4.43 (m, 1H, Chiral), 3.59-3.29 (m, 2H, CH<sub>2</sub>-NH), 2.28-2.04 (m, 2H, N-CH<sub>2</sub>), 1.47 (m, 9H, *t*-butyl), 1.07 (m, 9H, *t*-butyl). Compound was identified by <sup>1</sup>H NMR and was consistent with literature values.<sup>1</sup>

1,4-di(*trans*-*N*-Boc-4-*tert*butyldiphenylsiloxy-L-prolinamide) butane. **8**

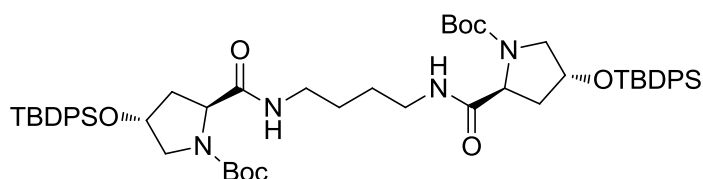

*trans*-*N*-Boc-4-*tert*butyldiphenylsiloxy-L-proline **7** (0.295 g, 0.623 mmol) was dissolved in DCM (20 mL) and cooled to 0 °C. HOBT (0.02 g, 0.015 mmol) was added to the solution and the mixture was stirred for 5 min. EDCI (0.085 g, 0.074 mmol) was added to the mixture followed by 3 min additional stirring followed by the introduction of 1,4-diaminobutane (0.03 mL, 0.297 mmol) was introduced. The mixture was allowed to reach room temperature and stirred for 16 h. The final reaction mixture was diluted with additional DCM (30 mL) and washed with 10% citric acid (3 × 30 mL), saturated NaHCO<sub>3</sub> (3 × 30 mL) and brine (1 × 30 mL). The resulting organic phase was dried over MgSO<sub>4</sub> and the solvent was removed *in vacuo* to give the crude *N*-Boc protected diprolineamide **8** as a colourless oil. The crude mixture was purified *via* flash chromatography (1/3 EtOAc : Pet spirits → 1/1 EtOAc : Pet spirits) to give the pure dimer as a viscous colourless oil (0.292 g, 0.254 mmol, 85%). R<sub>f</sub> = 8/33 (1:1 EtOAc : Pet. Spirits); <sup>1</sup>H NMR (400 MHz, CDCl<sub>3</sub>) δ (ppm) = 7.62 (m, 8H, aryl), 7.40 (m, 12H, aryl), 4.40 (br, 4H, chiral), 3.72 (br, 1H, CH<sub>2</sub>-NH), 3.43 (br, 1H, CH<sub>2</sub>-NH), 3.23 (br, 4H CO-NH-CH<sub>2</sub>), 2.22 (br, 2H, CH<sub>1</sub>-CH<sub>2</sub>), 1.88 – 1.76 (br. m, 2H, CH<sub>1</sub>-CH<sub>2</sub>), 1.43 (br, 18H, O-*t*-butyl), 1.25 (br, 4H, alkyl), 1.03 (br, 18H, Si-*t*-butyl); <sup>13</sup>C NMR (400 MHz, CDCl<sub>3</sub>) δ (ppm) = 172.04, 155.97, 135.70, 133.59, 129.94, 127.85, 71.03, 60.47, 59.07, 55.20, 40.22, 37.66, 37.66, 37.66, 37.66, 28.43, 26.91, 19.16; [α]<sub>D</sub><sup>22.2</sup> = -30.8 ° (c = 0.00089, CHCl<sub>3</sub>); IR ν<sub>max</sub> = 2930 (m), 1660 (s), 1105 (s), 700 (s); HRMS calculated for [C<sub>56</sub>H<sub>79</sub>N<sub>4</sub>O<sub>8</sub>Si<sub>2</sub>]<sup>+</sup> M = 991.5431 found 991.53809.

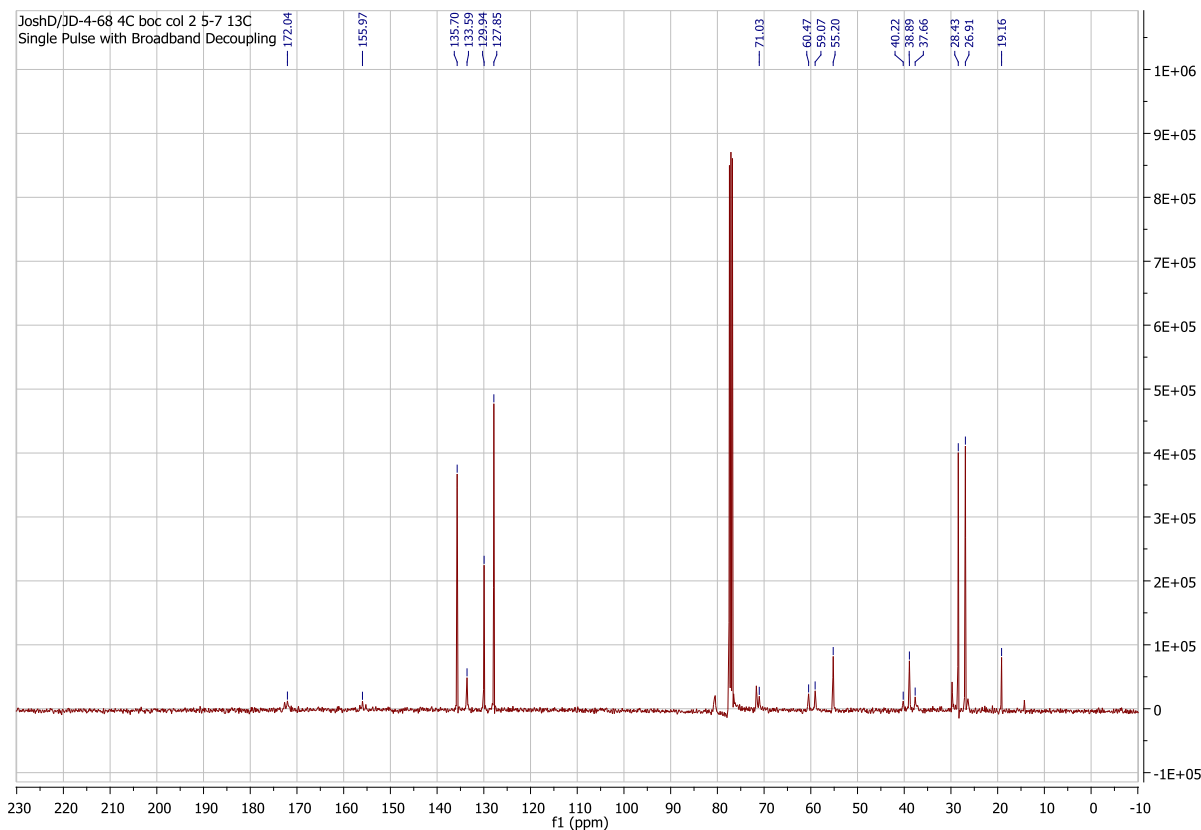

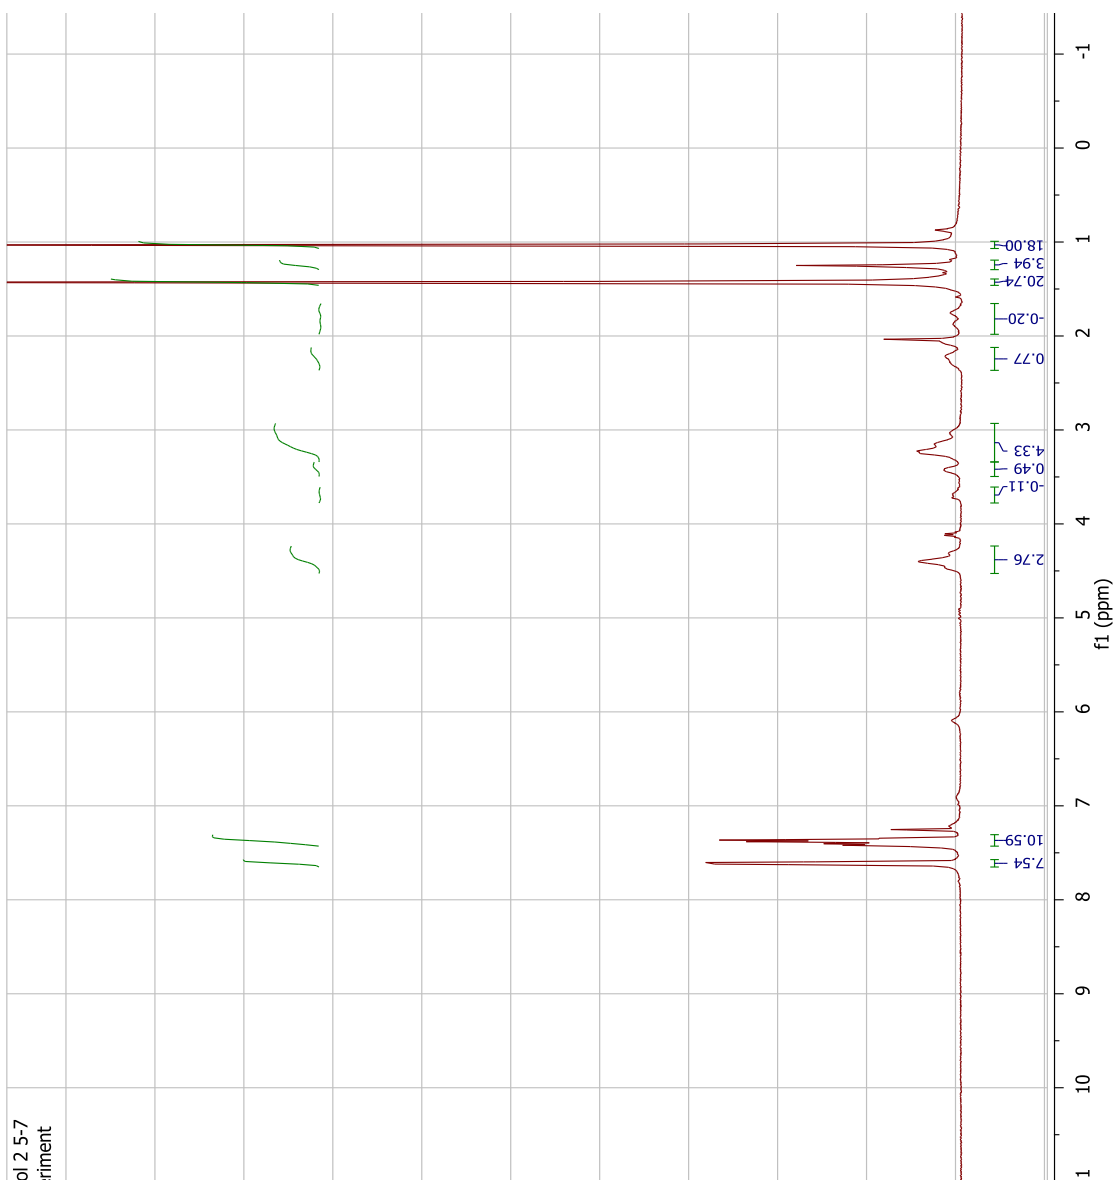

1,4-di( *trans*-4-*tert*butyldiphenylsiloxy-L-prolinamide) butane **1**

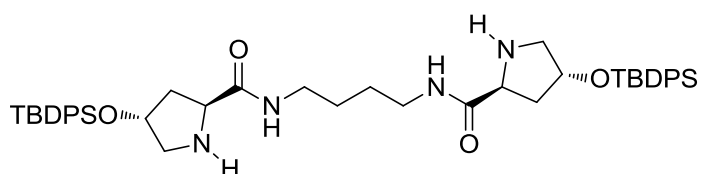

*N*-Boc protected diproline **8** (0.394 g, 0.398 mmol) was solvated in DCM (18 mL) and stirred. To the stirring solution was added TFA (2 mL) to bring the solution to a 10 vol% concentration of acid/DCM. The solution was

stirred for 6h under an inert atmosphere at room temperature. The final mixture was basified with saturated NaHCO<sub>3</sub> (50 mL) and extracted into DCM (3 × 30 mL). The combined organic phase was then washed with additional NaHCO<sub>3</sub> (3 × 30 mL) and the organic phase was dried over MgSO<sub>4</sub>. The solvent was removed in vacuo to give an opaque oil. Residual solvent was azeotroped with Et<sub>2</sub>O to give the final organocatalyst **1** as an amorphous pale brown solid (0.309 g, 0.39 mmol, 98%). R<sub>f</sub> = 4/33 (1:9 MeOH : EtOAc); Mp = 205.5 – 207 °C; <sup>1</sup>H NMR (400 MHz, CDCl<sub>3</sub>) δ (ppm) = 7.61 (m, 8H, aryl), 7.36 (m, 12H, aryl), 4.35 (br, 2H, CH<sub>1</sub>-O), 4.00 (t, J = 8.4 Hz, 2H, CH<sub>1</sub>-N), 3.14 (m, 4H, CO-NH-CH<sub>2</sub>), 2.9 (d, J = 12.1 Hz, 2H, CH<sub>2</sub>-NH), 2.58 (d, J = 12.1 Hz, 2H, CH<sub>2</sub>-NH), 2.26 (m, 2H, CH<sub>1</sub>-CH<sub>2</sub>), 1.70 (ddd, J = 13.6, 8.4, 4.8 Hz, 2H, CH<sub>1</sub>-CH<sub>2</sub>), 1.45 (br, 4H, alkyl), 1.04 (br, 18H, *t*-butyl); <sup>13</sup>C NMR (400 MHz, CDCl<sub>3</sub>) δ (ppm) = 173.7, 135.8, 133.2, 129.9, 127.9, 71.8, 65.9, 59.4, 51.9, 38.9, 26.7, 19, 15.4; [α]<sub>D</sub><sup>23.3</sup> = -37.6 ° (c = 0.0025, CHCl<sub>3</sub>); IR ν<sub>max</sub> = 2925 (m), 1624 (s) 698 (s); HRMS calculated for [C<sub>46</sub>H<sub>63</sub>N<sub>4</sub>O<sub>8</sub>Si<sub>2</sub>]<sup>+</sup> M = 791.4382 found 791.4395.

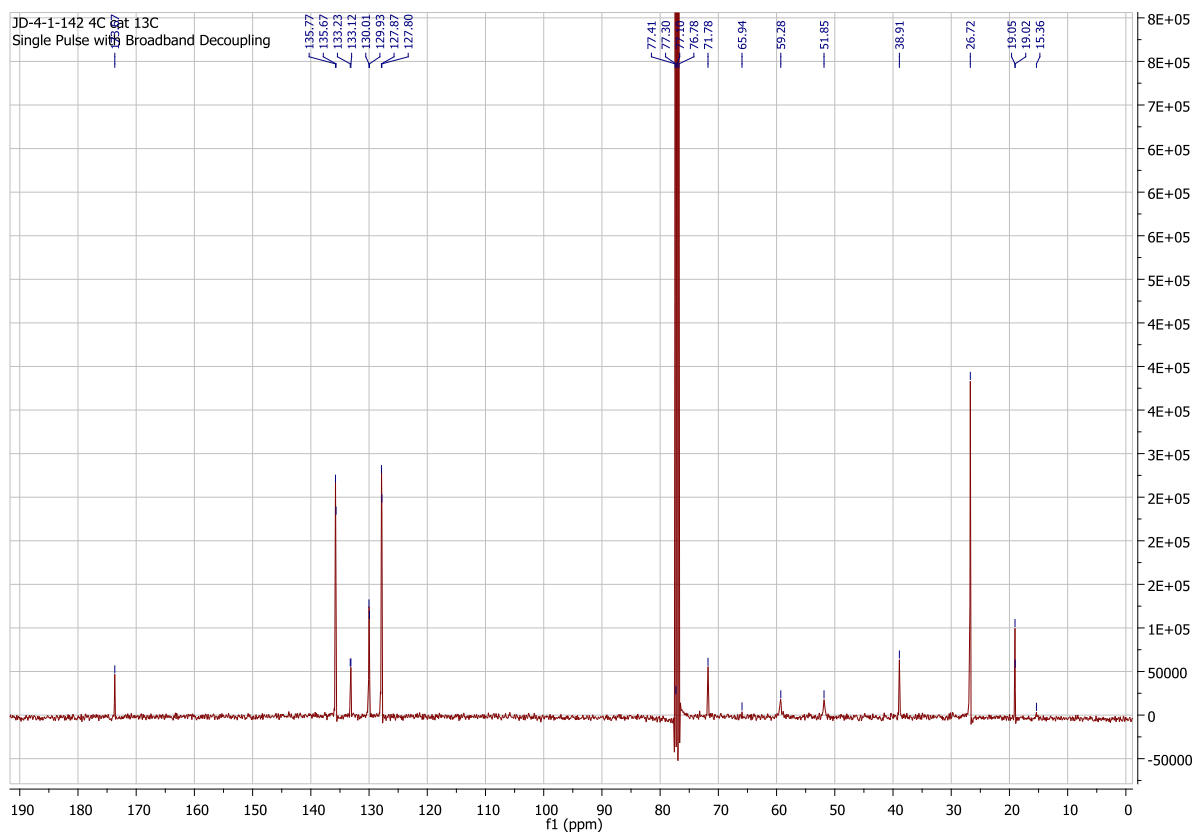

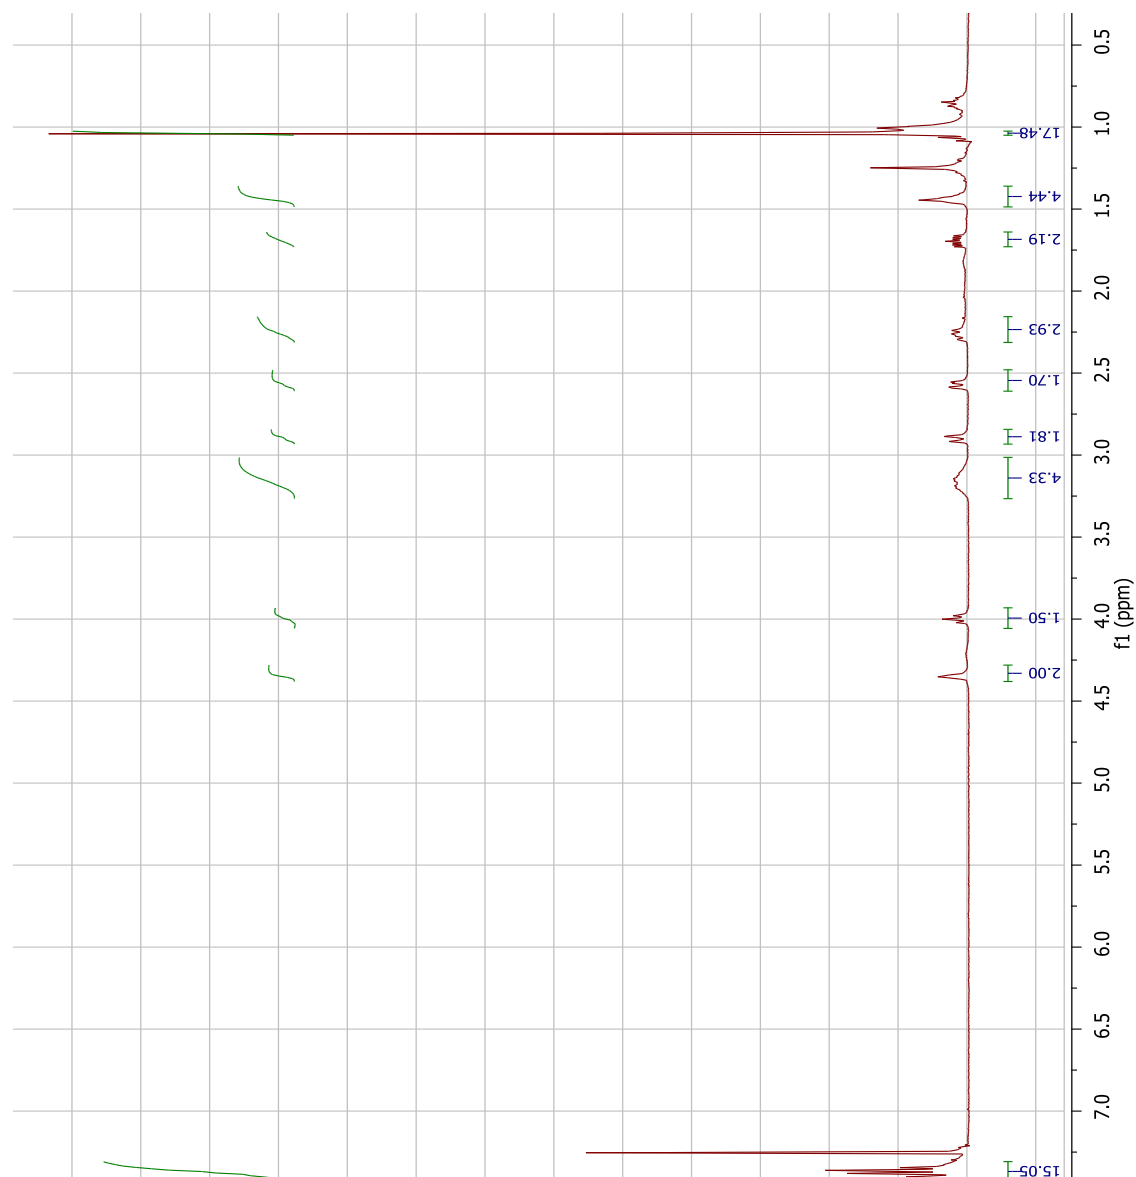

*1,6-di(trans-N-Boc-4-tertbutyldiphenylsiloxy-L-prolinamide) hexane 9*

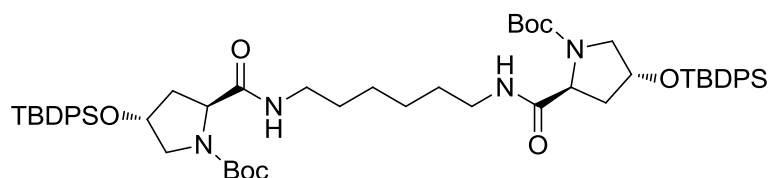

Trans-N-Boc-4-tertbutyldiphenylsiloxy-L-proline **7** (0.714 g, 1.52 mmol) was dissolved in DCM (20 mL) and cooled to 0 °C. HOBt (0.042 g, 0.36 mmol) was added to the solution and the mixture was stirred for 5 min. EDCI (0.218 g, 1.41 mmol) was added to the mixture followed by 3 min additional stirring followed by the introduction of 1,6-diaminohexane (0.084 g, 0.72 mmol) was introduced. The mixture was allowed to reach room temperature

and stirred for 16 h. The final reaction mixture was diluted with additional DCM (30 mL) and washed with 10% citric acid (3 × 30 mL), saturated NaHCO<sub>3</sub> (3 × 30 mL) and brine (1 × 30 mL). The resulting organic phase was dried over MgSO<sub>4</sub> and the solvent was removed *in vacuo* to give the crude *N*-Boc protected diprolinamide **8**. The crude mixture was purified *via* flash chromatography (1/3 EtOAc : Pet spirits) to give the pure dimer as a white amorphous solid (0.484 g, 0.475 mmol, 66%). <sup>1</sup>H NMR (270 MHz, CDCl<sub>3</sub>) δ (ppm) = 7.59 – 7.25 (m, 20H aryl), 4.39 (m, 4H, chiral H), 3.69 – 3.42 (m, 4H, CH-CH<sub>2</sub>-CH), 3.17 (br s, 4 H, CO-NH-CH<sub>2</sub>), 2.39 – 1.97 (br m, 4H, N-CH<sub>2</sub>), 1.43 (s, 18H, *N*-*t*-butyl), 1.40 (br, 4H, alkyl), 1.24 (br, 4H, alkyl), 1.02 (s, 18H, Si-*t*-butyl). The compound was confirmed by correlation to published <sup>1</sup>H NMR spectra.<sup>2,3</sup>

1,6-di(*trans*-4-*tert*butyldiphenylsiloxy-L-prolinamide) hexane **2**

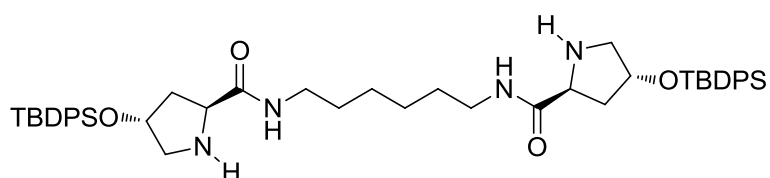

*N*-Boc protected diprolinamide **9** (0.318 g, 0.312 mmol) was solvated in DCM (18 mL) and stirred. To the stirring solution was added TFA (2 mL) to bring the solution to a 10 vol% concentration of acid/DCM. The solution was stirred for 6h under an inert atmosphere at room temperature. The final mixture was basified with saturated NaHCO<sub>3</sub> (50 mL) and extracted into DCM (3 × 30 mL). The combined organic phase was then washed with additional NaHCO<sub>3</sub> (3 × 30 mL) and the organic phase was dried over MgSO<sub>4</sub>. The solvent was removed *in vacuo* to give an opaque oil. Residual solvent was azeotroped with Et<sub>2</sub>O to give the final organocatalyst **1** as an amorphous pale brown solid (0.252 g, 0.31 mmol, 99%). <sup>1</sup>H NMR (270 MHz, CDCl<sub>3</sub>) δ (ppm) = 7.608 (br m, 8H, aryl), 7.38 (br m, 12H, aryl), 4.35 (br, 2H, CH<sub>1</sub>-O), 3.99 (t, *J* = 8.4 Hz, CH<sub>1</sub>-N), 3.14 (tt, *J* = 19.2, 6.88, Hz, 4H, CH<sub>2</sub>-N), 2.89 (d, *J* = 12.1 Hz, 2H, N-CH<sub>2</sub>-CH), 2.56 (dd, *J* = 4.45, 7.7 Hz, 2H, CH<sub>2</sub>-NH), 2.24 (m, 2H, CH<sub>1</sub>-CH<sub>2</sub>), 1.7 (ddd, *J* = 13.2, 8.8, 4.8 Hz, 2H, CH<sub>1</sub>-CH<sub>2</sub>), 1.41 (m, 4H, alkyl), 1.27 (m, 4H, alkyl), 1.03 (br s, 18H, *t*-butyl). The compound was confirmed by correlation to published <sup>1</sup>H NMR spectra.<sup>2,3</sup>

1,8-di(*trans*-*N*-Boc-4-*tert*butyldiphenylsiloxy-L-prolinamide) octane **10**

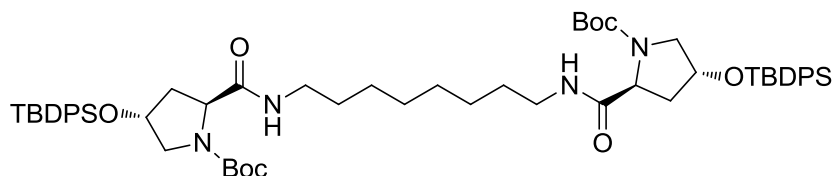

*Trans*-*N*-Boc-4-*tert*butyldiphenylsiloxy-L-proline **7** (0.565 g, 0.120 mmol) was dissolved in DCM (15 mL) and cooled to 0 °C. HOBt (0.030 g, 0.022 mmol) was added to the solution and the mixture was stirred for 5 min. EDCI (0.241 g, 0.125 mmol) was added to the mixture followed by 3 min additional stirring followed by the introduction of 1,8-diaminooctane (0.082 g, 0.057 mmol). The mixture was allowed to reach room temperature and stirred for 16 h. The final reaction mixture was diluted with additional DCM (30 mL) and washed with 2M HCl



(2 × 30 mL), saturated NaHCO<sub>3</sub> (2 × 30 mL) and brine (2 × 30 mL). The resulting organic phase was dried over MgSO<sub>4</sub> and the solvent removed *in vacuo* to give the crude *N*-Boc protected diprolinamide as a colourless oil. The crude mixture was purified *via* flash chromatography (1/9 EtOAc : Pet spirits) to give the pure dimer **10** as a viscous colourless oil (0.507 g, 0.0544 mmol, 45%). R<sub>f</sub> = 11/31 (1/3 EtOAc : Pet. Spirits); <sup>1</sup>H NMR (270 MHz, CDCl<sub>3</sub>) δ (ppm) = 7.69-7.36 (m, 20H, aryl), 4.52-4.36 (m, 4H, chiral H), 3.67-3.65 (m, 4H, CH-CH<sub>2</sub>-CH), 3.52-3.37 (m, 4H, CH<sub>2</sub>-NH), 2.29-1.79 (m, 4H, N-CH<sub>2</sub>), 1.57 (s, 4H, Alkyl), 1.43 (s, 18H, O-*t*-butyl), 1.24 (s, 8H, Alkyl), 1.03 (s, 18H, Si-*t*-butyl); <sup>13</sup>C NMR (400 MHz, CDCl<sub>3</sub>) δ (ppm) = 173.7, 153.9, 135.7, 133.6, 123.0, 127.7, 71.6, 70.8, 58.3, 57.8, 54.9, 54.6, 52.2, 52.0, 39.7, 38.9, 28.5, 28.4, 26.9, 19.4; [α]<sub>D</sub><sup>21.2</sup> = -89.2 ° (c = 0.001, CHCl<sub>3</sub>); IR ν<sub>max</sub> = 2928 (s), 1664 (s), 1162 (s); 702 (s); HRMS calculated for [C<sub>60</sub>H<sub>87</sub>N<sub>4</sub>O<sub>8</sub>Si<sub>2</sub>]<sup>+</sup> M = 1047.6057 found 1047.6185.

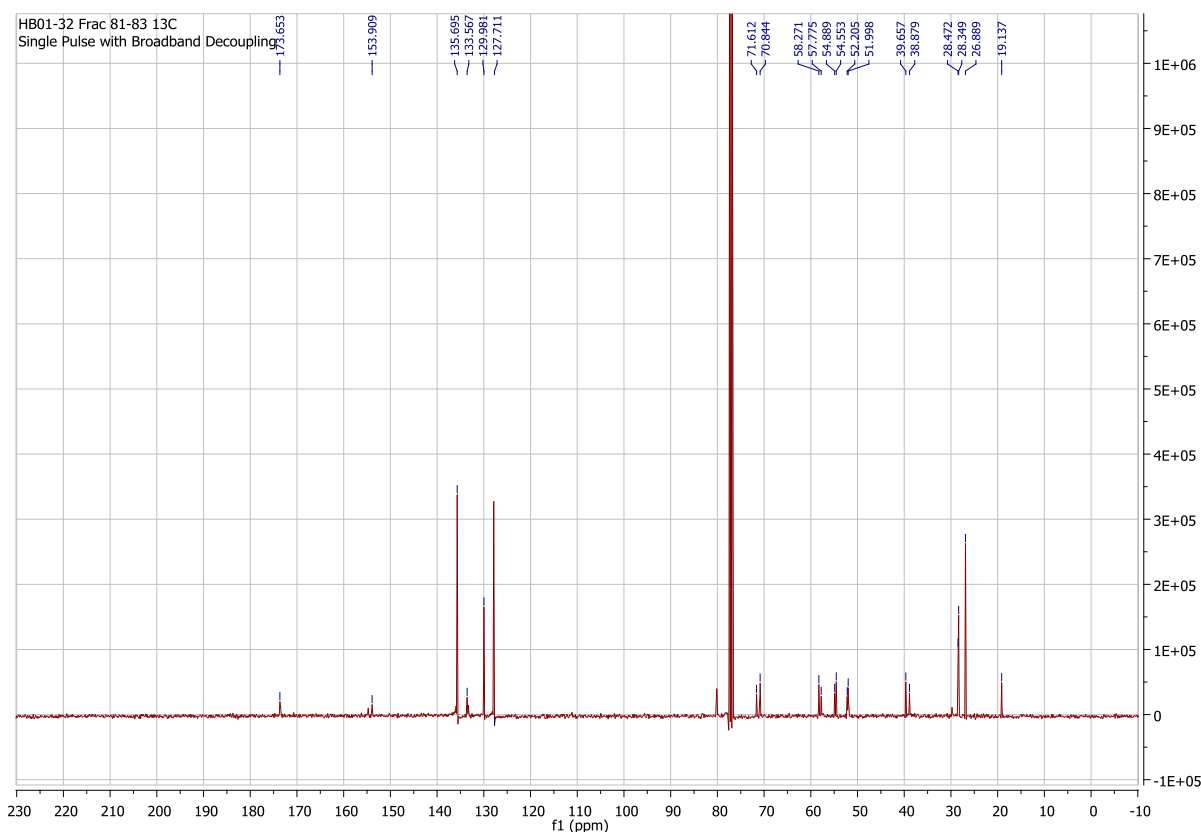

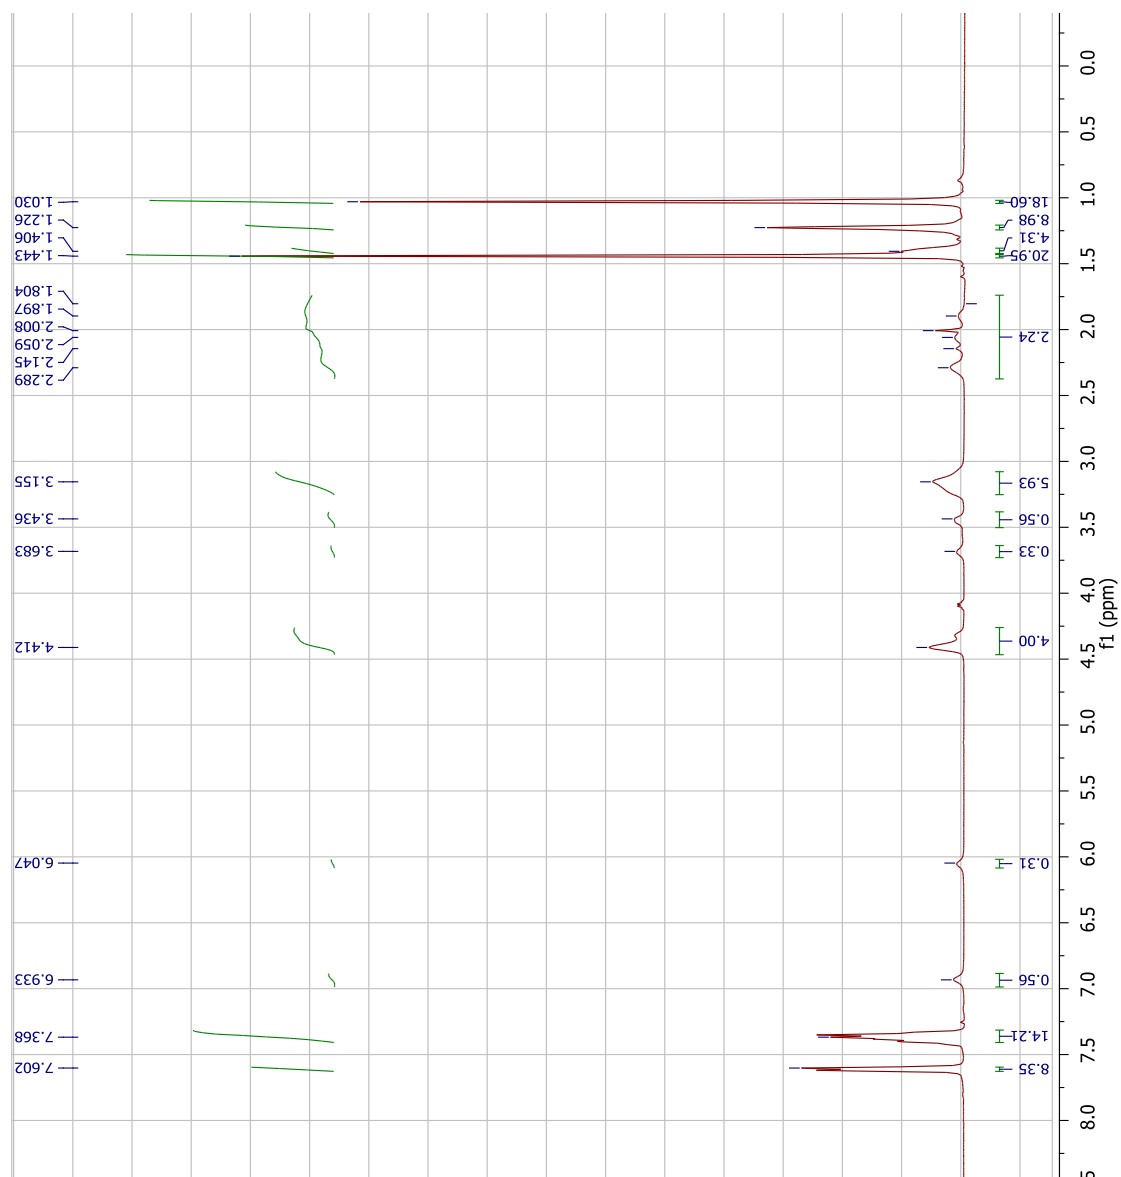

1,8-di(*trans*-*N*-Boc-4-*tert*butyldiphenylsiloxy-*L*-prolinamide) octane **3**

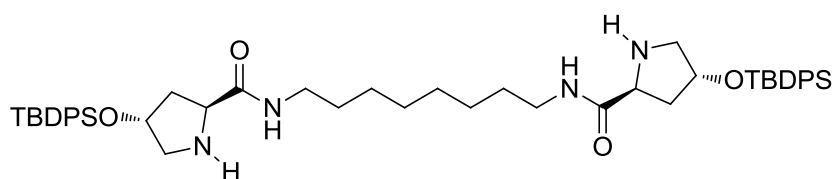

*N*-Boc protected diprolineamide **10** was solvated in DCM (18 mL) and stirred. To the stirring solution TFA (2 mL) was added to bring the solution to a 10 vol% concentration of acid/DCM. The solution was stirred for 7 h under an inert atmosphere at room temperature. The final mixture was basified with saturated NaHCO<sub>3</sub> (50 mL) and extracted into DCM (3 × 30 mL). The combined organic phase was then washed with additional NaHCO<sub>3</sub> (3 × 30 mL) and the organic phase was dried over MgSO<sub>4</sub>. The solvent was removed *in vacuo* to give an opaque oil. Residual solvent was azeotroped with Et<sub>2</sub>O to give the final organocatalyst **3** as pale brown oil (0.248 g, 0.029 mmol, 54%). *R*<sub>f</sub> = 0.5; <sup>1</sup>H NMR (400 MHz, CDCl<sub>3</sub>) δ (ppm) = 7.6 (m, 8H, aryl), 7.38 (m, 12H, aryl), 4.36 (br, 2H, Chiral), 4.08 (t, *J* = 8 Hz, 2H, chiral), 3.15 (q, *J* = 4 Hz, 4H, CH<sub>2</sub>-NH), 2.95-2.91 (dt, *J* = 12, 1.6 Hz, NH-CH<sub>2</sub>-CH), 2.62 (dd, *J* = 12, 3.2 Hz, 2H, NH-CH<sub>2</sub>-CH), 2.29 (m, 2H, CH-CH<sub>2</sub>-CH), 1.74 (ddd, *J* = 13.2, 8.4, 4.4 Hz, 2H, CH-CH<sub>2</sub>-CH), 1.42 (m, 8H, Alkyl), 1.23 (m, 4H, Alkyl), 1.04 (m, 18H, *t*-butyl); <sup>13</sup>C NMR (400 MHz, CDCl<sub>3</sub>) δ (ppm) 174.37, 135.74, 135.69, 134.03, 133.73, 129.90, 129.86, 127.84, 127.82, 77.49, 77.17, 76.86, 74.81, 59.93, 55.62, 40.03, 38.86, 29.61, 29.15, 27.00, 26.82, 19.17; [α]<sub>D</sub><sup>22.5</sup> = -16.0 ° (c = 0.001, CHCl<sub>3</sub>); IR ν<sub>max</sub> = 2929 (s), 1657 (s), 702 (s); HRMS calculated for [C<sub>50</sub>H<sub>71</sub>O<sub>4</sub>Si<sub>2</sub>]<sup>+</sup> M = 847.5008 found 847.5016.

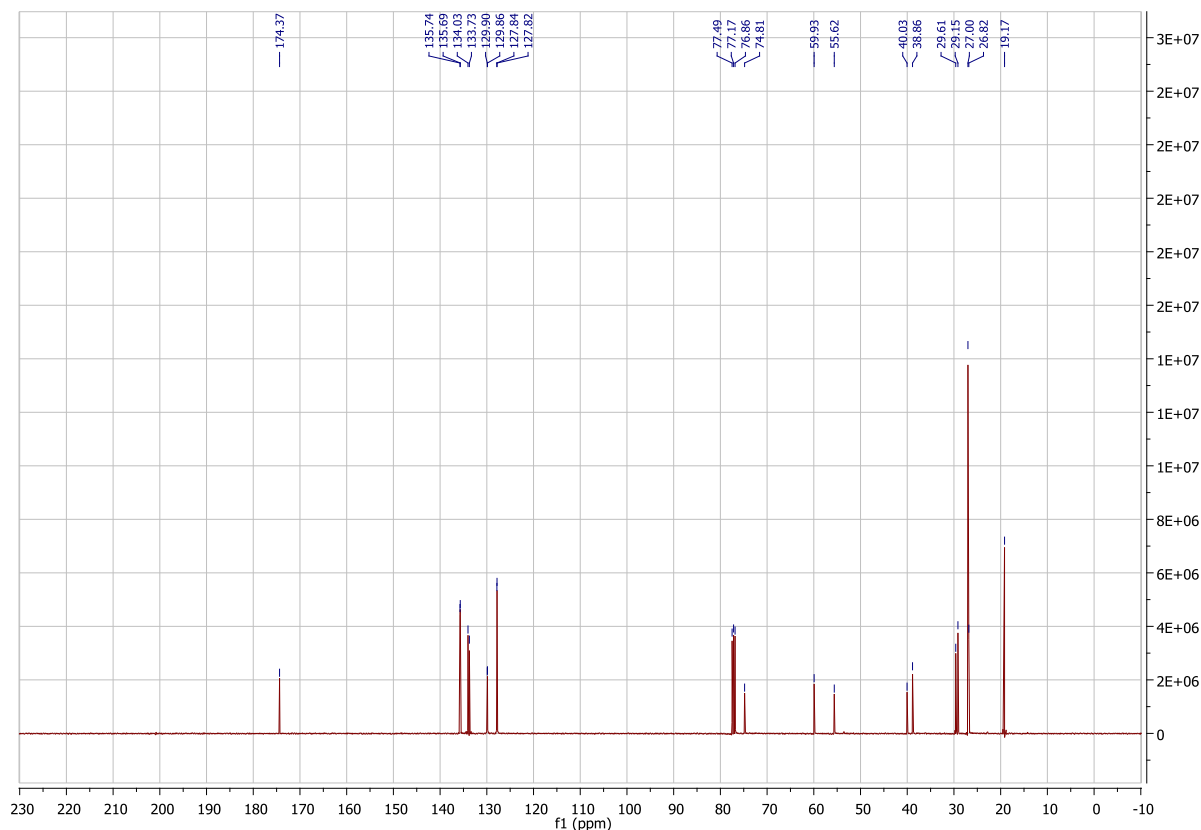

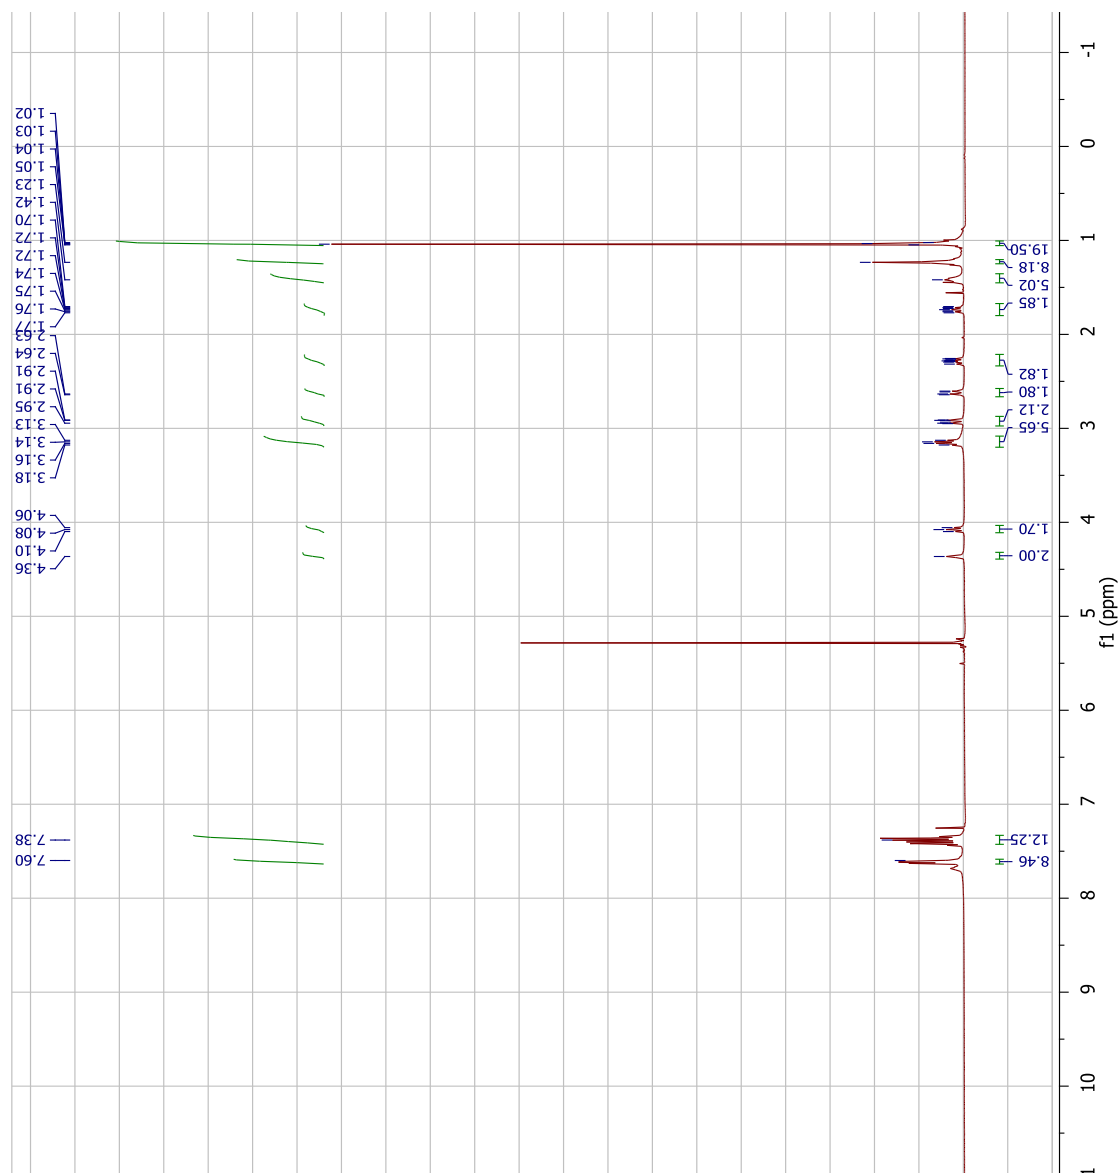

**1,10-di(trans-N-Boc-4-tertbutyldiphenylsiloxy-L-prolinamide) decane 11**

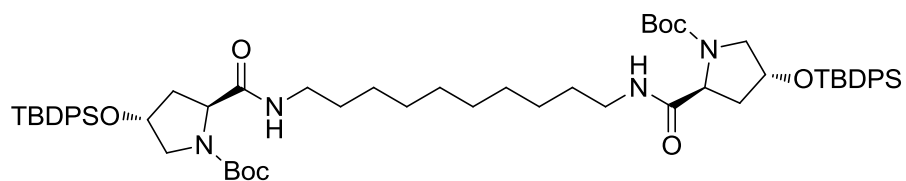

trans-N-Boc-4-tertbutyldiphenylsiloxy-L-proline **7** (0.296 g, 0.063 mmol) was dissolved in DCM (15 mL) and cooled to 0 °C. HOBt (0.016 g, 0.012 mmol) was added to the solution and the mixture was stirred for 5 min.

EDCI (0.127 g, 0.066 mmol) was added to the mixture followed by 3 min additional stirring followed by the introduction of 1,10-diaminodecane (0.051 g, 0.030 mmol). The mixture was allowed to reach room temperature and stirred for 16 h. The final reaction mixture was diluted with additional DCM (30 mL) and washed with 2M HCl (2 × 30 mL), saturated NaHCO<sub>3</sub> (2 × 30 mL) and brine (2 × 30 mL). The resulting organic phase was dried over MgSO<sub>4</sub> and the solvent removed *in vacuo* to give the crude *N*-Boc protected diprolineamide as a colourless oil. The crude mixture was purified *via* flash chromatography (1/4 EtOAc : Pet spirits) to give the pure dimer **11** as a viscous colourless oil (0.246 g, 0.023 mmol, 36%). R<sub>f</sub> = 18/31 (1/3 EtOAc : Pet. Spirits); <sup>1</sup>H NMR (400 MHz, CDCl<sub>3</sub>) δ (ppm) 7.59 (m, 8H, aryl), 7.37 (m, 12H, aryl), 4.39 (s, 4H, chiral), 3.64 – 3.44 (m, 4H, NH-CH<sub>2</sub>-CH), 3.17 (br, 4H, alkyl), 2.60 (dd, 2H, *J* = 12, 4, CH<sub>2</sub>NH), 2.28 (m, 2H, CH-CH<sub>2</sub>-CH), 1.73 (m, 2H, CH-CH<sub>2</sub>-CH), 1.43 (m, 4H, alkyl), 1.28 – 1.9 (m, 4H, CH-CH<sub>2</sub>-CH), 1.44 (br, 18H, O-*t*-butyl), 1.4 (br, 4H, alkyl), 1.2 (br, 12H, alkyl), 1.02 (s, 18H, Si-*t*-butyl); <sup>13</sup>C NMR (400MHz, CDCl<sub>3</sub>) δ (ppm) = 173.66, 153.91, 135.69, 133.62, 129.99, 127.87, 70.85, 58.28, 57.78, 54.90, 54.56, 52.21, 52.01, 39.66, 38.88, 28.48, 28.35, 26.90, 19.14; [α]<sub>D</sub><sup>23.6</sup> = -29.4 ° (c = 0.001, CHCl<sub>3</sub>); IR ν<sub>max</sub> = 2929 (s), 1700 (s), 1162 (s), 702 (s); HRMS calculated for [C<sub>62</sub>H<sub>91</sub>N<sub>4</sub>O<sub>8</sub>Si<sub>2</sub><sup>+</sup>] M = 1075.6370 found 1047.6435.

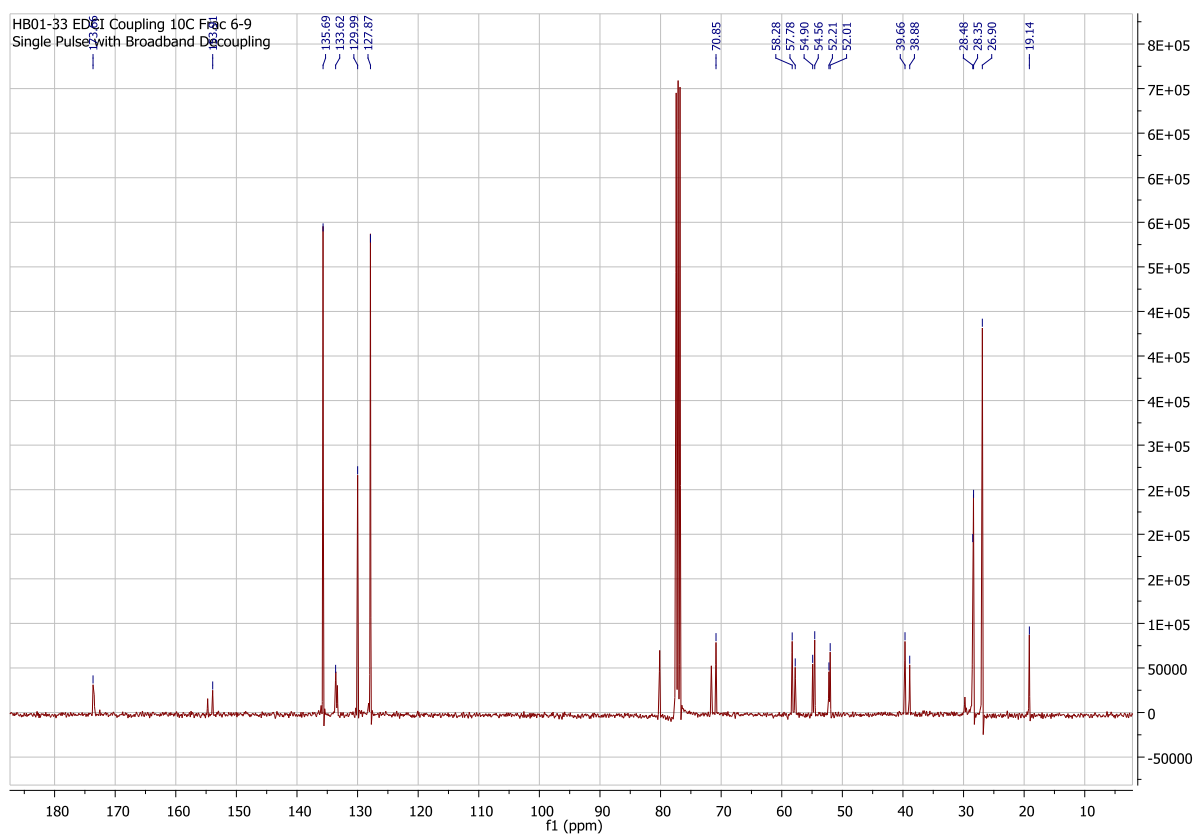

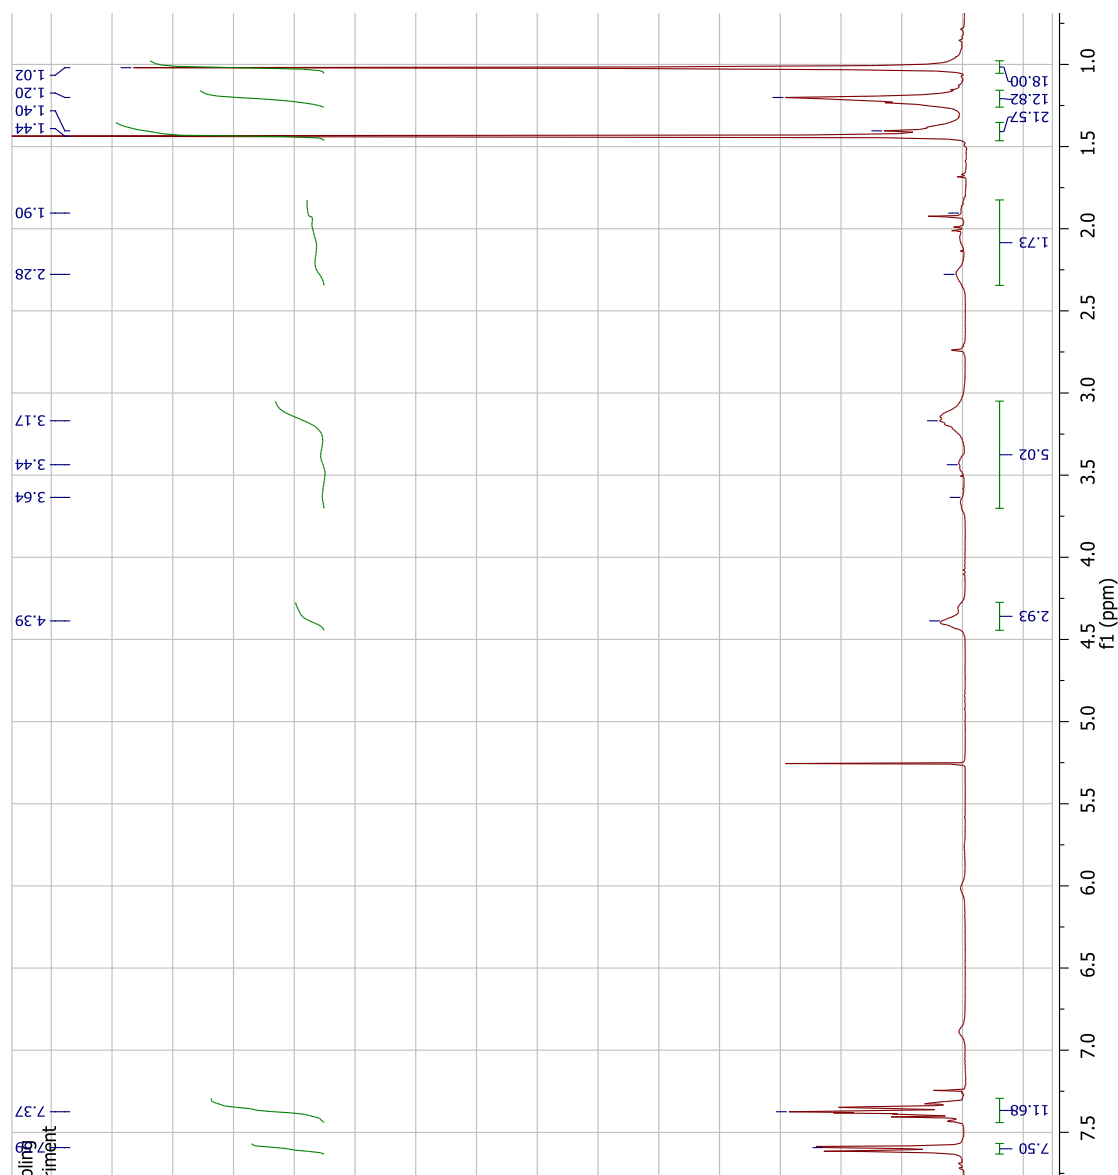

1,10-di(*trans*-4-*tert*butyldiphenylsiloxy-L-prolinamide) decane **4**

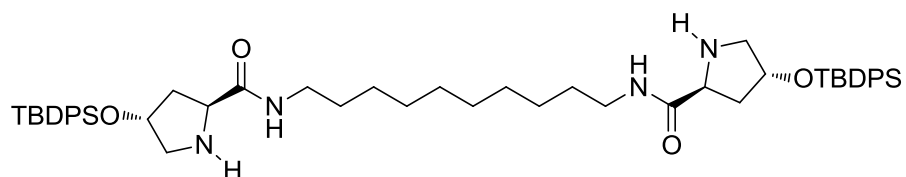

*N*-Boc protected diprolinamide **11** was solvated in DCM (18 mL) and stirred. To the stirring solution TFA (2 mL) was added to bring the solution to a 10 vol% concentration of acid/DCM. The solution was stirred for 6 h under an inert atmosphere at room temperature. The final mixture was basified with saturated NaHCO<sub>3</sub> (50 mL) and extracted into DCM (3 × 30 mL). The combined organic phase was then washed with additional NaHCO<sub>3</sub> (3 × 30 mL) and the organic phase was dried over MgSO<sub>4</sub>. The solvent was removed *in vacuo* to give an opaque oil. Residual solvent was azeotroped with Et<sub>2</sub>O to give the final organocatalyst **4** as pale brown oil (0.136 g, 0.015 mmol, 66%). *R*<sub>f</sub> = 0.63 (1:9 MeOH/EtOAc); <sup>1</sup>H NMR (400 MHz, CDCl<sub>3</sub>) δ (ppm) = 7.62 (m, 8H, aryl), 2.38 (m, 12H, aryl), 4.36 (s, 2H, chiral), 4.03 (t, 2H, *J* = 8.4 Hz, chiral), 3.15 (m, 4H, CO-NH-CH<sub>2</sub>), 2.92 (d, 2H, *J* = 12 Hz, NH-CH<sub>2</sub>-CH), 2.60 (9dd, 2H, *J* = 12, 3.2 Hz, NH-CH<sub>2</sub>-CH), 2.32 – 2.26 (m, 2H, CH-CH<sub>2</sub>-CH), 1.73 (ddd, 2H, *J* = 12.8, 8, 4.4 Hz, CH-CH<sub>2</sub>-CH), 4.13 (br. m, 4H, alkyl), 1.22 (br. s, 12H, alkyl), 1.04 (s, 18H, *t*-butyl); <sup>13</sup>C NMR

(500MHz, CDCl<sub>3</sub>) δ (ppm) = 174.3, 135.7, 134.0, 133.6, 129.8, 121.8, 59.9, 55.5, 47.9, 40.0, 38.8, 29.6, 29.4, 29.2, 26.9, 26.85, 19.0; [α]<sub>D</sub><sup>24.1</sup> = -49.4 ° (c = 0.001, CHCl<sub>3</sub>); IR ν<sub>max</sub> = 2928 (s), 1662 (s), 702 (s); HRMS calculated for [C<sub>52</sub>H<sub>75</sub>N<sub>4</sub>O<sub>4</sub>Si<sub>2</sub><sup>+</sup>] M = 875.5321 found 875.5337.

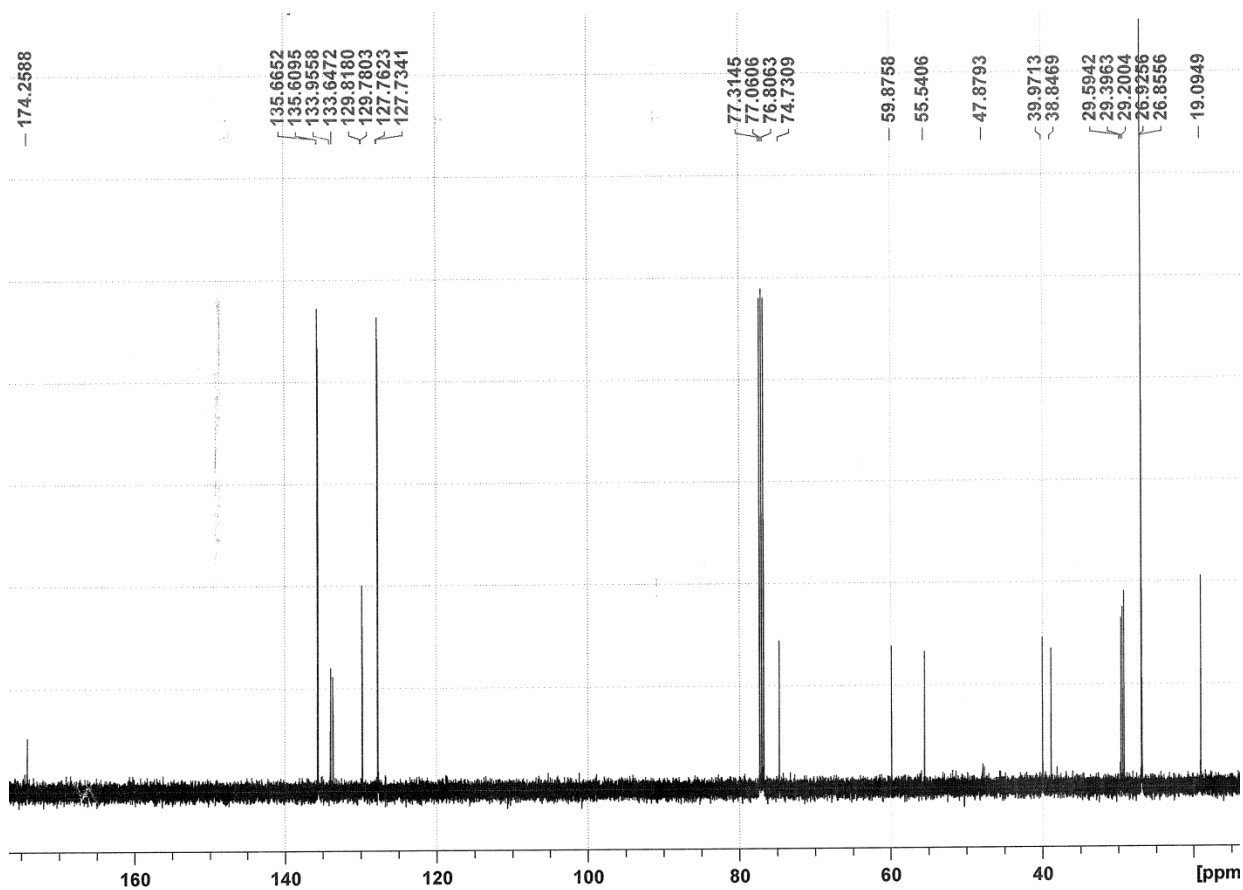

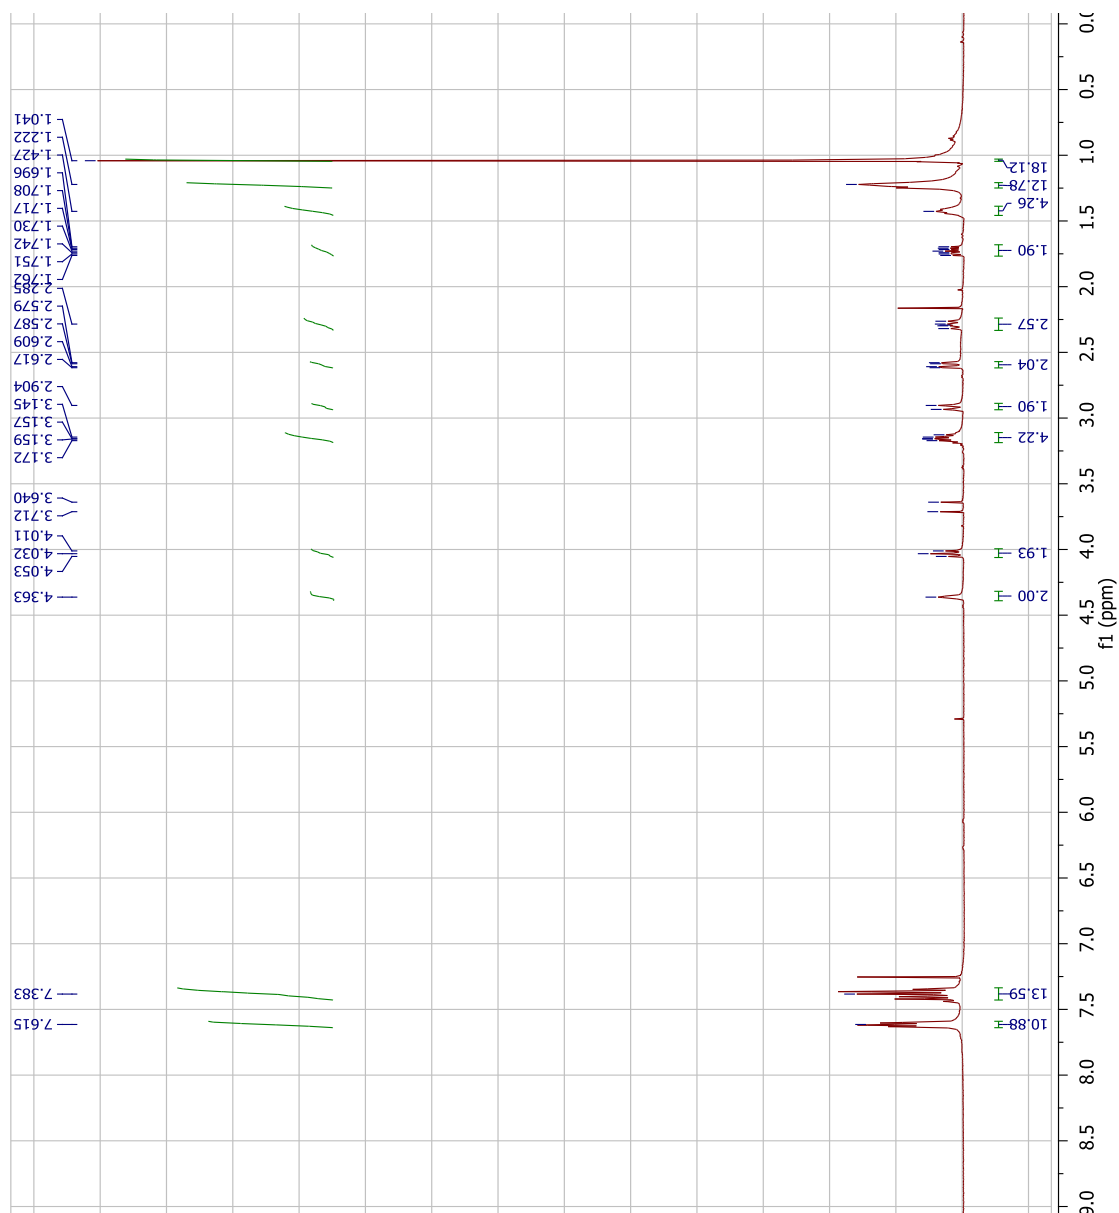



1,12-di(*trans*-*N*-Boc-4-*tert*butyldiphenylsiloxy-*L*-prolinamide) dodecane **12**

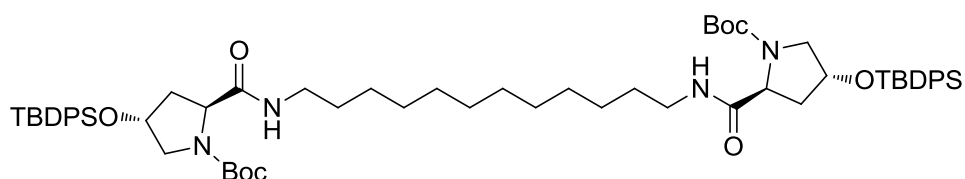

*trans*-*N*-Boc-4-*tert*butyldiphenylsiloxy-*L*-proline **7** (0.3 g, 0.64 mmol) was dissolved in DCM (25 mL) and cooled to 0 °C. HOBT (0.021 g, 0.152 mmol) was added to the solution and the mixture was stirred for 5 min. EDCI (0.077 g, 0.67 mmol) was added to the mixture followed by 3 min additional stirring followed by the introduction of 1,12-diaminododecane (0.061 g, 0.305 mmol) was introduced. The mixture was allowed to reach room temperature and stirred for 16 h. The final reaction mixture was diluted with additional DCM (30 mL) and washed with 10% citric acid (3 × 30 mL), saturated NaHCO<sub>3</sub> (3 × 30 mL) and brine (1 × 30 mL). The resulting organic phase was dried over MgSO<sub>4</sub> and the solvent was removed *in vacuo* to give crude *N*-Boc protected diprolinamide as colourless oil. The crude compound was purified *via* flash chromatography (1/3 EtOAc : Pet spirits) to give the pure dimer **12** as a viscous colourless oil (0.14 g, 0.127 mmol, 42%). *R*<sub>f</sub> = 1/3 (1:1 EtOAc : Pet. Spirits); <sup>1</sup>H NMR (400 MHz, CDCl<sub>3</sub>) δ (ppm) = 7.62 (m, 8H, aryl), 7.38 (m, 12H aryl), 4.41 – 4.32 (br. m, 4H, chiral H), 3.71 (br, 2H, NH-CH<sub>2</sub>), 3.44 (br, 2H, NH-CH<sub>2</sub>), 3.16 (4H, NH-CH<sub>2</sub>), 2.31 (br, 2H, CH-CH<sub>2</sub>-CH), 2.06 – 1.94 (br. m, 2H, CH-CH<sub>2</sub>-CH), 1.42 (br, 18H, O-*t*-butyl), 1.25 (br, 20H, alkyl), 1.04 (br, 18H, Si-*t*-butyl); <sup>13</sup>C NMR (400 MHz, CDCl<sub>3</sub>) δ (ppm) = 171.44, 156.45, 135.67, 133.57, 129.94, 127.85, 70.99, 60.58, 58.85, 55.16, 40.20, 39.44, 36.98, 32.00, 29.76, 29.60, 29.35, 28.42, 26.91, 19.16.; [α]<sub>D</sub><sup>24.6</sup> = -46.7 ° (c = 0.00033, CHCl<sub>3</sub>); IR ν<sub>max</sub> = 2927 (s), 11656 (s), 700 (s); HRMS calculated for [C<sub>64</sub>H<sub>95</sub>N<sub>4</sub>O<sub>8</sub>Si<sub>2</sub><sup>+</sup>] M = 1103.6683 found 1103.69985.

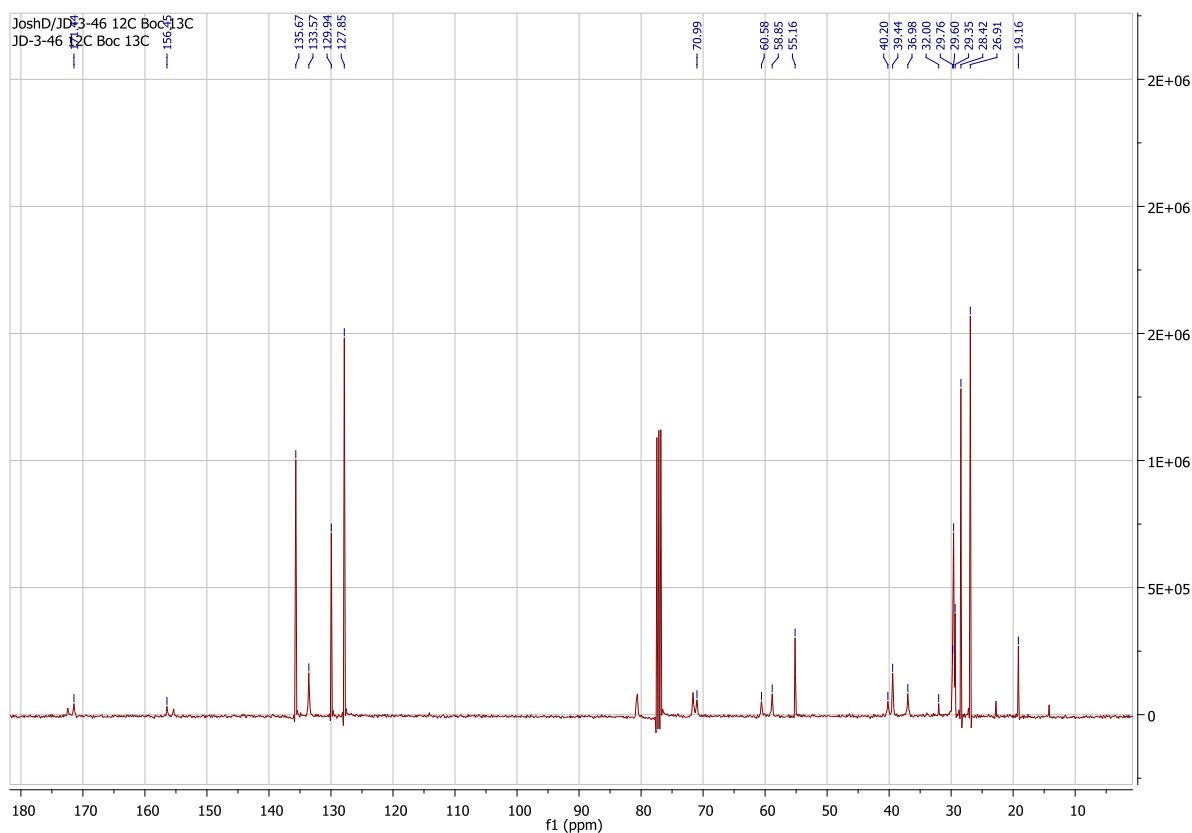

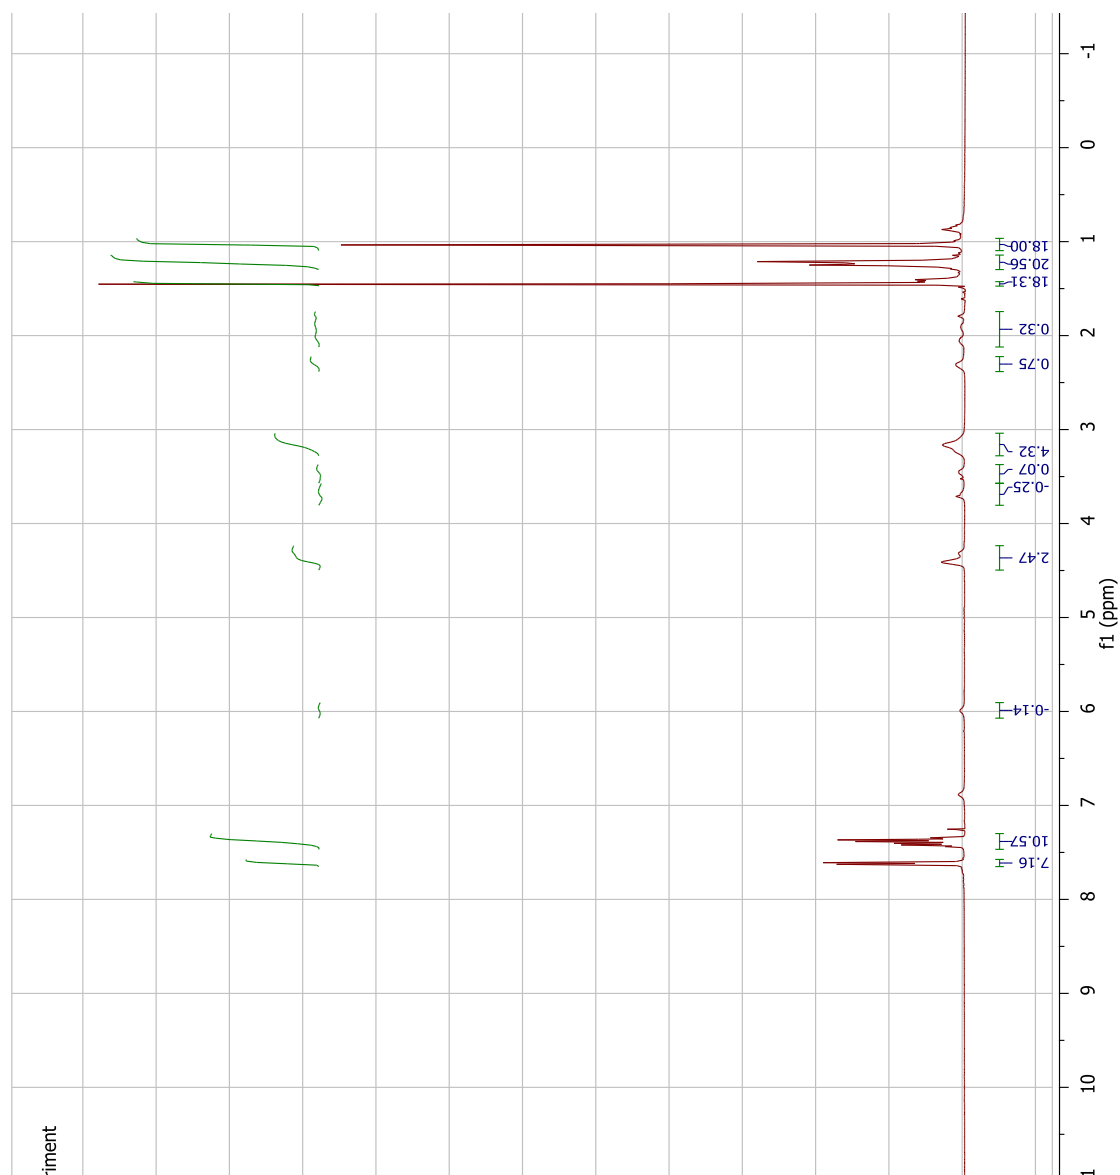

1,12-di( *trans*-4-*tert*butyldiphenylsiloxy-L-prolinamide) dodecane **5**

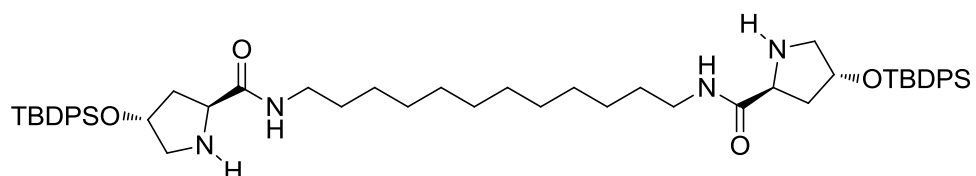

*N*-Boc protected diprolineamide **12** (0.16 g, 0.0145 mmol) was dissolved in (18 mL) and stirred. To the stirring solution was added TFA (2 mL) to bring the solution to a 10 vol% concentration of acid/DCM. The solution was

stirred for 6h under an inert atmosphere at room temperature. The final mixture was basified with saturated NaHCO<sub>3</sub> (50 mL) and extracted into DCM (3 × 30 mL). The combined organic phase was then washed with additional NaHCO<sub>3</sub> (3 × 30 mL) and the organic phase was dried over MgSO<sub>4</sub>. The solvent was removed in vacuo to give a pale yellow oil. Residual solvent was azeotroped with Et<sub>2</sub>O to give the final organocatalyst **5** as a viscous pale yellow oil (0.13 g, 0.144 mmol, 99%). R<sub>f</sub> = 20/33 (1:9 MeOH : EtOAc); <sup>1</sup>H NMR (270 MHz, CDCl<sub>3</sub>) δ (ppm) = 7.59 (br m, 8H, aryl), 7.38 (m, 12H, aryl), 4.36 (br, 1H, CH<sub>1</sub>-O), 4.09 (t, J = 8.4 Hz, 1H, CH<sub>1</sub>-N), 3.14 (m, 4H, NH-CH<sub>2</sub>), 2.94 (d, 2H J = 11.9 Hz, CH<sub>2</sub>-NH), 2.65 (dd, 2H, J = 11.9, 3.32 Hz, CH<sub>2</sub>-NH), 2.27 (m, 2H, CH-CH<sub>2</sub>-CH), 1.76 (ddd, 2H, J = 13.2, 8, 4.4 Hz, CH-CH<sub>2</sub>-CH), 1.41 (br, 4H, alkyl), 1.21 (br, 16H, alkyl), 1.03 (br, 18H, *t*-butyl); <sup>13</sup>C NMR (400 MHz, CDCl<sub>3</sub>) δ (ppm) = 173.9, 135.7, 133.9, 133.6, 129.1, 127.8, 74.6, 65.9, 59.8, 55.5, 39.7, 39.03, 29.78, 29.62, 29.52, 29.247, 26.7, 19.1, 15.4; [α]<sub>D</sub><sup>24.3</sup> = -12.8 °(0.00113, CHCl<sub>3</sub>); IR ν<sub>max</sub> = 2927 (s), 1658 (s), 1105 (s), 700 (s); HRMS calculated for [C<sub>54</sub>H<sub>79</sub>N<sub>4</sub>O<sub>8</sub>Si<sub>2</sub><sup>+</sup>] M = 903.5634 found 903.56196.

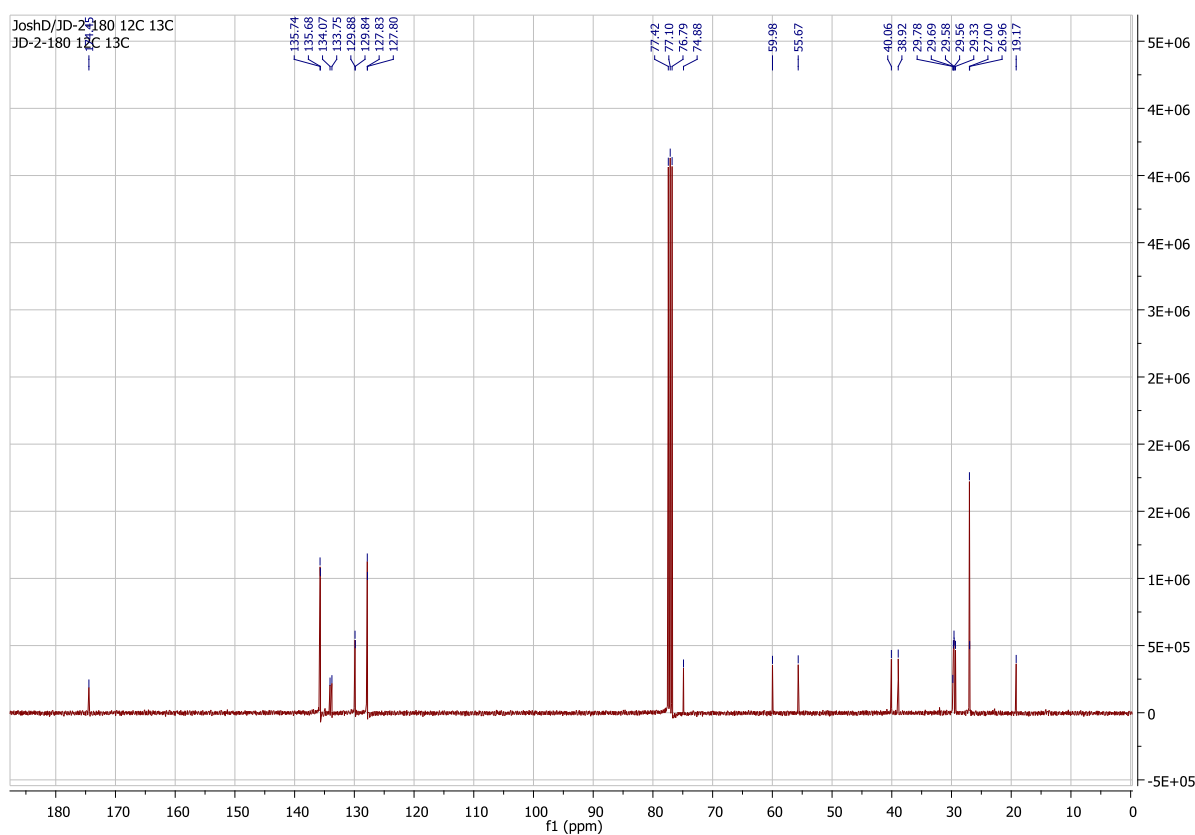

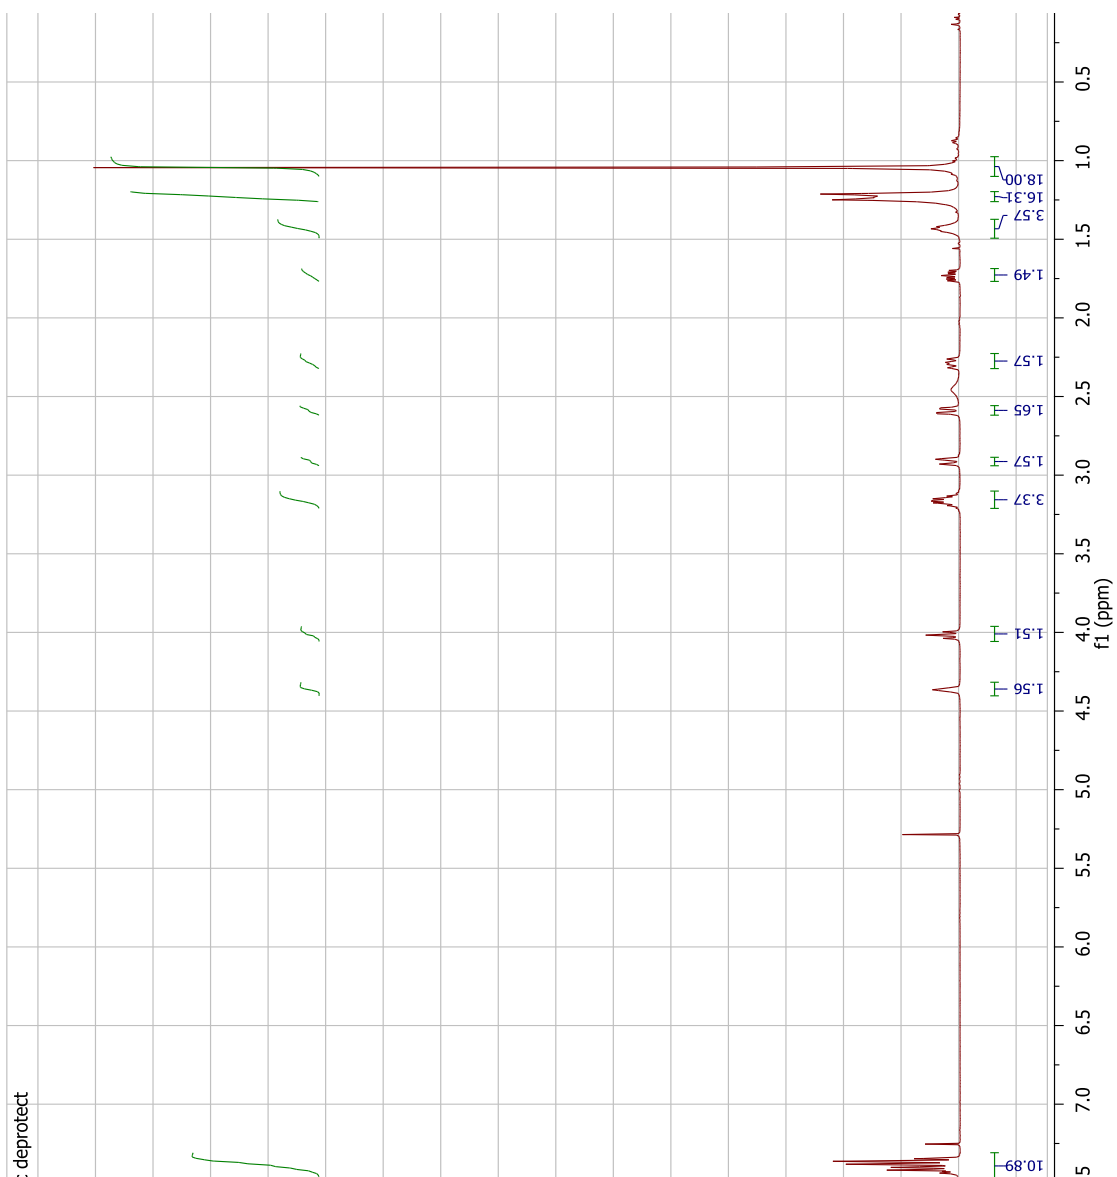

### Determination of Reaction Outcomes: Conversion and dr

The conversion of the initial aldehyde into the target compound was determined by the integration of key peaks within the  $^1\text{H}$  NMR spectra. The diastereomeric ratio was determined by integration of the chiral proton peaks for both the *syn* and the *anti* diastereomers.

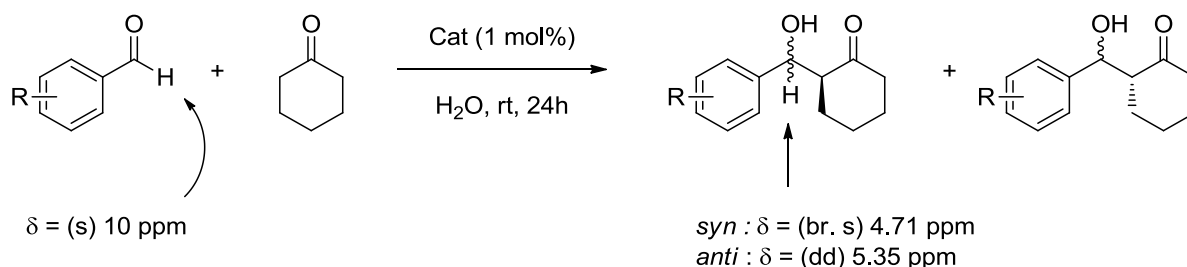

The key  $^1\text{H}$  NMR peaks that are integrated are determined from reported examples and lie in uncluttered regions of the NMR spectra.

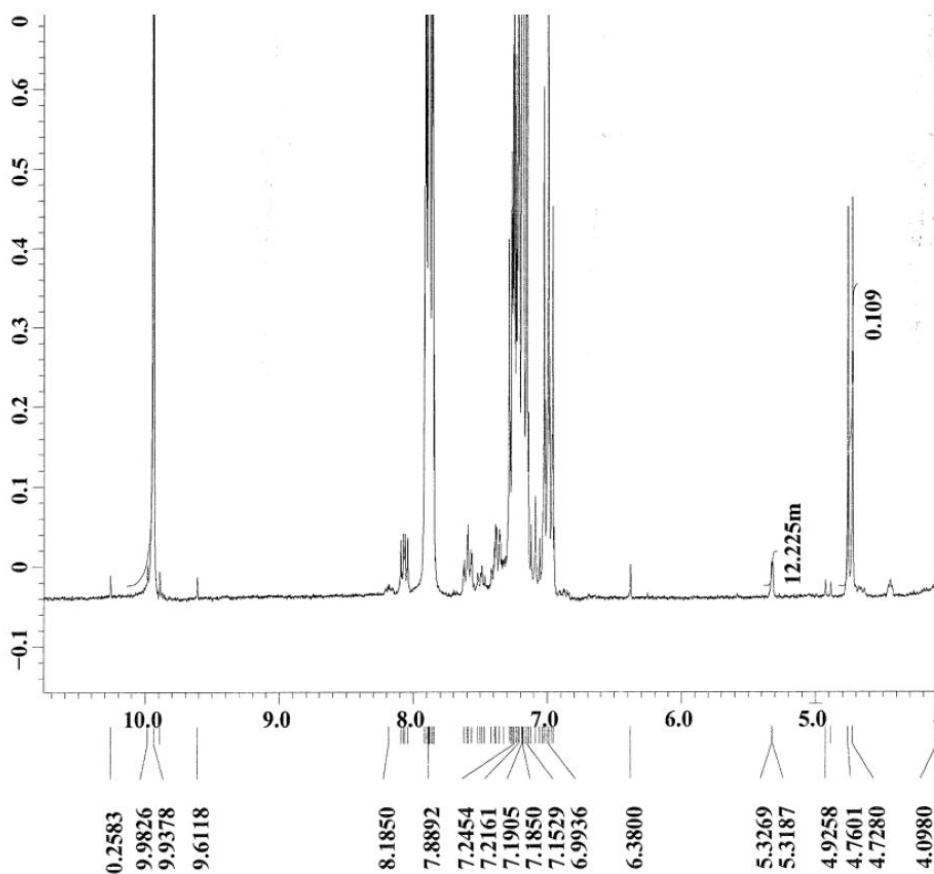

### Determination of Reaction Outcomes: Enantiomeric Excess.

Enantiomeric excess was determined by chiral HPLC, integrating the peak area of each enantiomer from the major diastereomer. The elution times were compared to racemic examples synthesised through one of two methods.

### Representative Syntheses for Aldol Product Racemates (Benzaldehyde)

**Procedure A:** A stirred solution of water (15 mL) was charged with 10M NaOH (1 mL). Ketone (0.28 mL, 2.7 mol, 5 equiv.) was added and the solution was stirred for 1 min. To the mixture was added aryl aldehyde (0.6 mL, 0.54 mmol, 1 equiv.) and the solution was stirred for 3 h. The mixture was extracted into CHCl<sub>3</sub> (3×20 mL) and the combined organic phase was dried with MgSO<sub>4</sub>. The racemic mixture was isolated via flash chromatography (1/3 EtOAc/Petroleum spirits).

**Procedure B:** Pyrrolidine (0.44 mL, 0.53 mmol, 1 equiv.) was added to a stirred solution of CHCl<sub>3</sub>. To the stirred mixture was added ketone (0.223 mL, 2.65 mmol, 5 equiv.) and aldehyde (80 mg, 0.53 mmol, 1 equiv.). Benzoic acid (20 mg, 0.16 mmol, 0.3 equiv.) was added to the mixture and the reaction was stirred at room temperature for 16 h. The reaction mixture was taken up in additional CHCl<sub>3</sub> and washed with 2M HCl (2×20 mL). The organic phase was dried with MgSO<sub>4</sub>. The racemic mixture was analysed by chiral HPLC without purification.

Structures of racemates were confirmed through correlation to reported <sup>1</sup>H NMR spectra.<sup>4</sup>

## 2-[Hydroxy-(phenyl)-methyl]-cyclohexanone

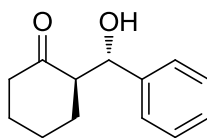

### Racemate

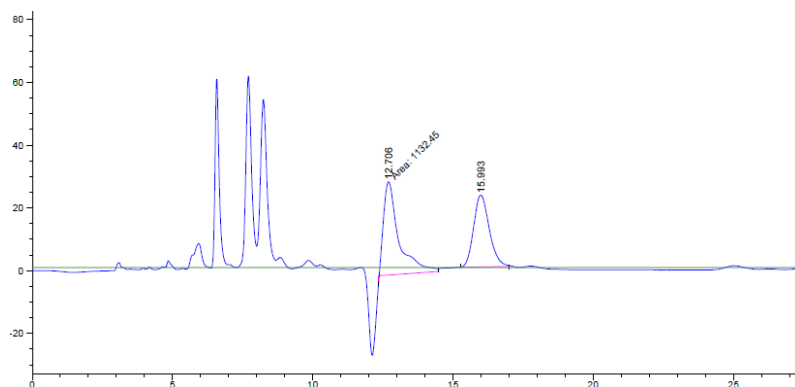

Signal 1: DAD1 C, Sig=278,4 Ref=360,100

| Peak #   | RetTime [min] | Type | Width [min] | Area [mAU*s] | Height [mAU] | Area %  |
|----------|---------------|------|-------------|--------------|--------------|---------|
| 1        | 12.706        | MM   | 0.6344      | 1132.45313   | 29.75147     | 56.0912 |
| 2        | 15.993        | BB   | 0.5977      | 886.49481    | 22.89845     | 43.9088 |
| Totals : |               |      |             | 2018.94794   | 52.64992     |         |

### Table 1, Entry 1, Catalyst 1 (1 mol%)

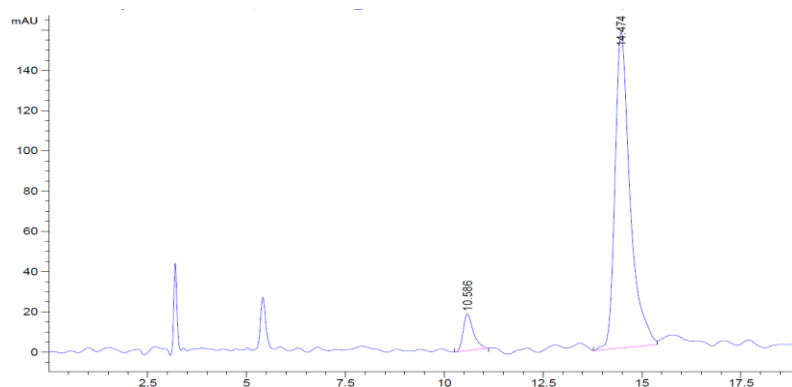

Signal 1: DAD1 B, Sig=210,4 Ref=360,100

| Peak #   | RetTime [min] | Type | Width [min] | Area [mAU*s] | Height [mAU] | Area %  |
|----------|---------------|------|-------------|--------------|--------------|---------|
| 1        | 10.586        | BB   | 0.2678      | 326.59290    | 18.16563     | 7.2672  |
| 2        | 14.474        | BV   | 0.3932      | 4167.46631   | 157.22237    | 92.7328 |
| Totals : |               |      |             | 4494.05920   | 175.38800    |         |

## 2-[Hydroxy-(phenyl)-methyl]-cyclohexanone



Table 1, Entry 2, Catalyst 2 (1 mol%)

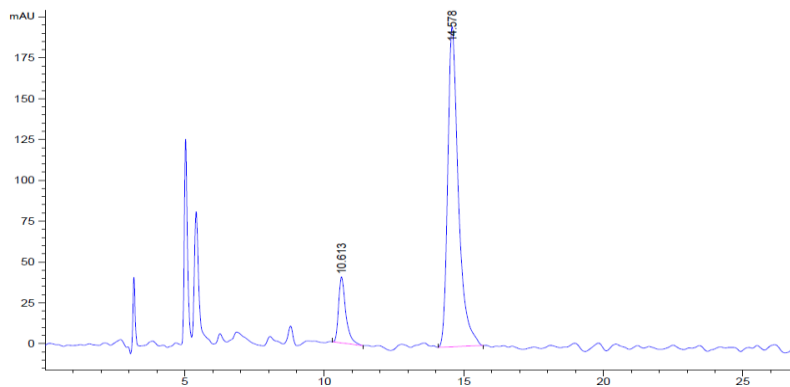

Signal 1: DAD1 B, Sig=210,4 Ref=360,100

| Peak # | RetTime [min] | Type | Width [min] | Area [mAU*s] | Height [mAU] | Area %  |
|--------|---------------|------|-------------|--------------|--------------|---------|
| 1      | 10.613        | BB   | 0.2673      | 725.07477    | 40.42458     | 12.2043 |
| 2      | 14.578        | BB   | 0.3965      | 5216.06299   | 195.99823    | 87.7957 |

Totals : 5941.13776 236.42281

Table 1, Entry 3, Catalyst 3 (1 mol%)

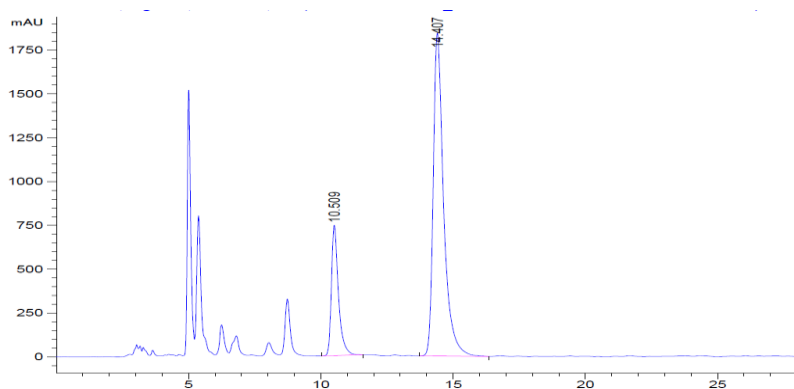

Signal 1: DAD1 B, Sig=210,4 Ref=360,100

| Peak # | RetTime [min] | Type | Width [min] | Area [mAU*s] | Height [mAU] | Area %  |
|--------|---------------|------|-------------|--------------|--------------|---------|
| 1      | 10.509        | BB   | 0.2731      | 1.37054e4    | 743.31232    | 21.4271 |
| 2      | 14.407        | BB   | 0.4044      | 5.02574e4    | 1841.45679   | 78.5729 |

Totals : 6.39628e4 2584.76910



## 2-[Hydroxy-(phenyl)-methyl]-cyclohexanone



Table 1, Entry 4, Catalyst 4 (1 mol%)

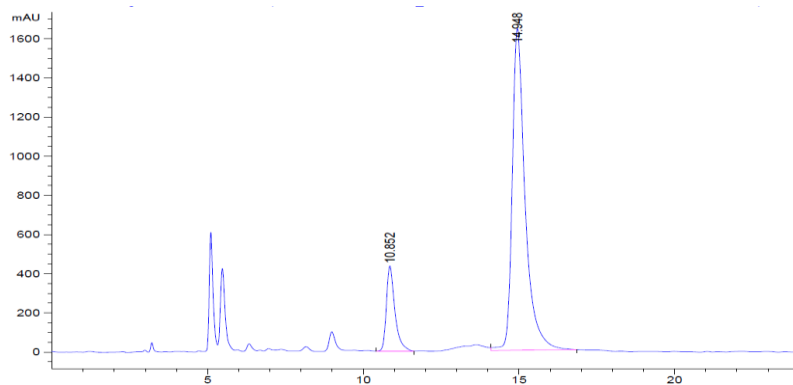

Signal 1: DAD1 B, Sig=210,4 Ref=360,100

| Peak # | RetTime [min] | Type | Width [min] | Area [mAU*s] | Height [mAU] | Area %  |
|--------|---------------|------|-------------|--------------|--------------|---------|
| 1      | 10.852        | BV   | 0.2839      | 8273.09766   | 434.87924    | 14.8339 |
| 2      | 14.948        | VB   | 0.4253      | 4.74986e4    | 1643.03223   | 85.1661 |

Totals : 5.57717e4 2077.91147

Table 1, Entry 5, Catalyst 5 (1 mol%)

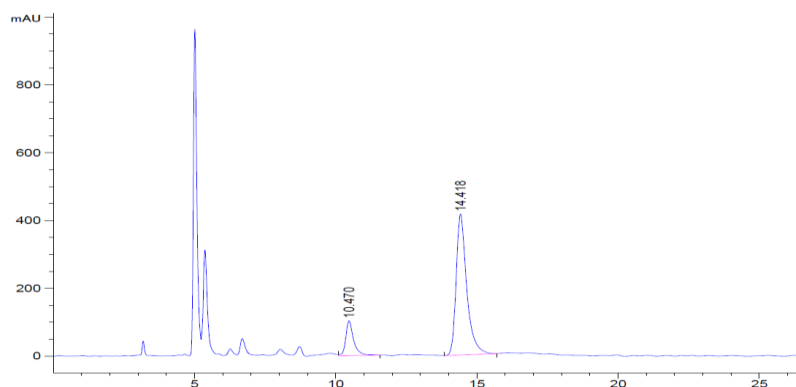

Signal 1: DAD1 B, Sig=210,4 Ref=360,100

| Peak # | RetTime [min] | Type | Width [min] | Area [mAU*s] | Height [mAU] | Area %  |
|--------|---------------|------|-------------|--------------|--------------|---------|
| 1      | 10.470        | VB   | 0.2831      | 1980.74329   | 102.65174    | 15.4854 |
| 2      | 14.418        | BB   | 0.3874      | 1.08103e4    | 415.67197    | 84.5146 |

Totals : 1.27910e4 518.32371

## 2-[Hydroxy-(phenyl)-methyl]-cyclohexanone



Table 3, Entry 1, Catalyst 3 (neat)

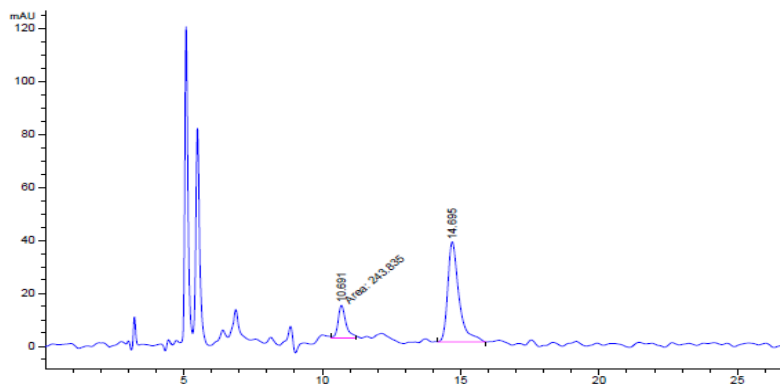

Signal 1: DAD1 H, Sig=250,100 Ref=360,100

| Peak # | RetTime [min] | Type | Width [min] | Area [mAU*s] | Height [mAU] | Area %  |
|--------|---------------|------|-------------|--------------|--------------|---------|
| 1      | 10.691        | MM   | 0.3293      | 243.83472    | 12.34279     | 18.6483 |
| 2      | 14.695        | BB   | 0.4169      | 1063.71057   | 37.73480     | 81.3517 |

Totals : 1307.54529 50.07759

Table 3, Entry 2, Catalyst 16 (neat)

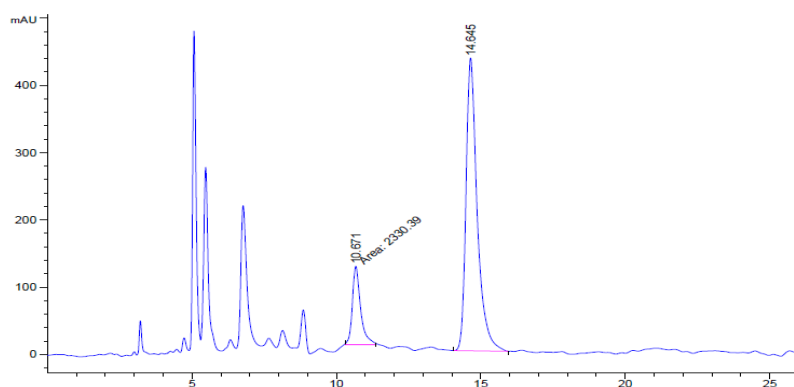

Signal 1: DAD1 B, Sig=210,4 Ref=360,100

| Peak # | RetTime [min] | Type | Width [min] | Area [mAU*s] | Height [mAU] | Area %  |
|--------|---------------|------|-------------|--------------|--------------|---------|
| 1      | 10.671        | MM   | 0.3326      | 2330.39014   | 116.76873    | 16.5788 |
| 2      | 14.645        | BB   | 0.4004      | 1.17260e4    | 435.06998    | 83.4212 |

Totals : 1.40564e4 551.83871

## 2-[Hydroxy-(phenyl)-methyl]-cyclohexanone



Table 3, Entry 3, Catalyst 16

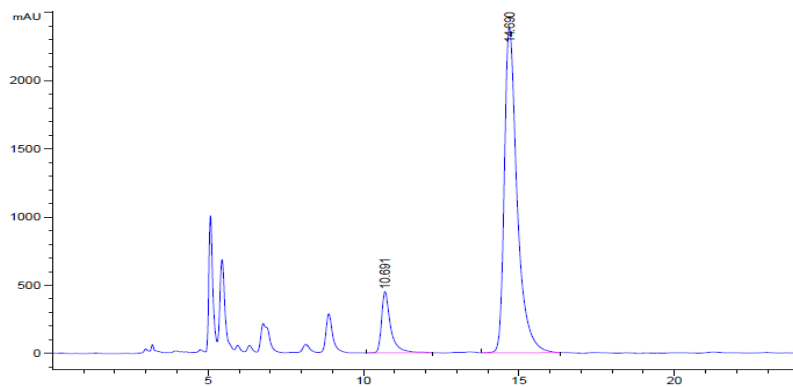

Signal 1: DAD1 B, Sig=210,4 Ref=360,100

| Peak # | RetTime [min] | Type | Width [min] | Area [mAU*s] | Height [mAU] | Area %  |
|--------|---------------|------|-------------|--------------|--------------|---------|
| 1      | 10.691        | BB   | 0.2957      | 9078.38086   | 449.28537    | 11.7558 |
| 2      | 14.690        | VB   | 0.4278      | 6.81466e4    | 2382.12891   | 88.2442 |

Totals : 7.72250e4 2831.41428

## 2-[Hydroxy-(phenyl)-methyl]-cyclopentanone

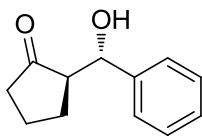

Racemate

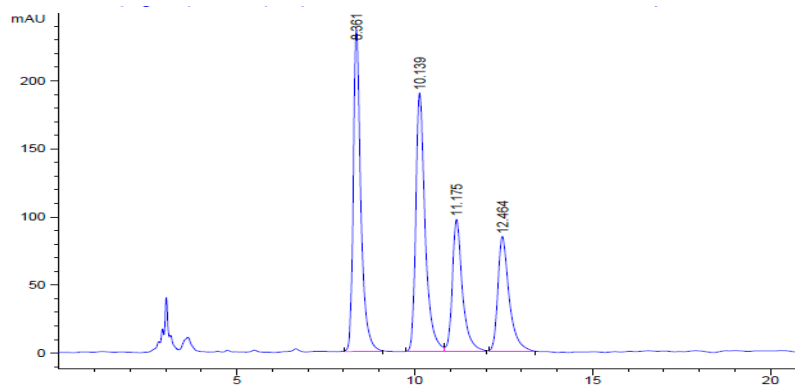

Signal 1: DAD1 B, Sig=210,4 Ref=360,100

| Peak # | RetTime [min] | Type | Width [min] | Area [mAU*s] | Height [mAU] | Area %  |
|--------|---------------|------|-------------|--------------|--------------|---------|
| 1      | 8.361         | BB   | 0.2203      | 3495.37964   | 236.61053    | 32.4870 |
| 2      | 10.139        | BV   | 0.2711      | 3470.04028   | 189.97961    | 32.2515 |
| 3      | 11.175        | VB   | 0.2924      | 1917.81604   | 97.10879     | 17.8247 |
| 4      | 12.464        | BB   | 0.3287      | 1876.06555   | 84.61137     | 17.4367 |

Totals : 1.07593e4 608.31031

Table 2, Entry 1, Catalyst 1

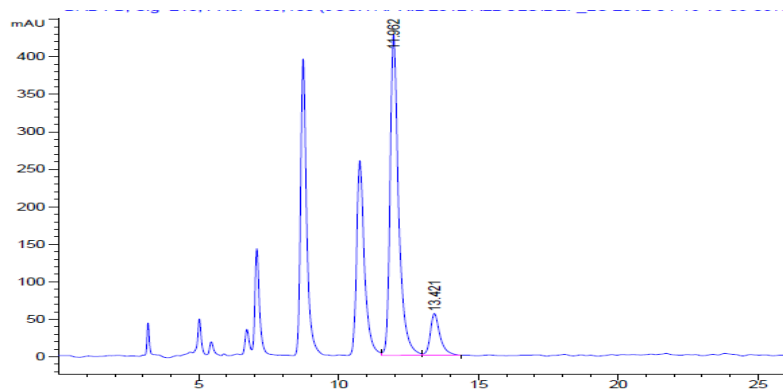

Signal 1: DAD1 B, Sig=210,4 Ref=360,100

| Peak # | RetTime [min] | Type | Width [min] | Area [mAU*s] | Height [mAU] | Area %  |
|--------|---------------|------|-------------|--------------|--------------|---------|
| 1      | 11.962        | VV   | 0.3136      | 9076.65723   | 427.73917    | 87.1707 |
| 2      | 13.421        | VB   | 0.3559      | 1335.85474   | 55.68472     | 12.8293 |

Totals : 1.04125e4 483.42389

## 2-[Hydroxy-(phenyl)-methyl]-cyclopentanone

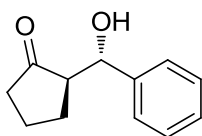

Table 2, Entry 1, Catalyst 2

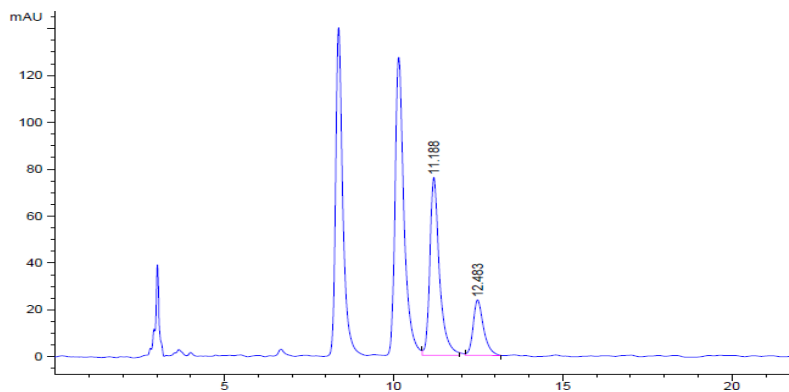

Signal 1: DAD1 B, Sig=210,4 Ref=360,100

| Peak # | RetTime [min] | Type | Width [min] | Area [mAU*s] | Height [mAU] | Area %  |
|--------|---------------|------|-------------|--------------|--------------|---------|
| 1      | 11.188        | VB   | 0.2919      | 1496.58984   | 75.93364     | 74.6640 |
| 2      | 12.483        | BB   | 0.3215      | 507.84387    | 23.74301     | 25.3360 |

Totals : 2004.43372 99.67665

Table 2, Entry 1, Catalyst 3

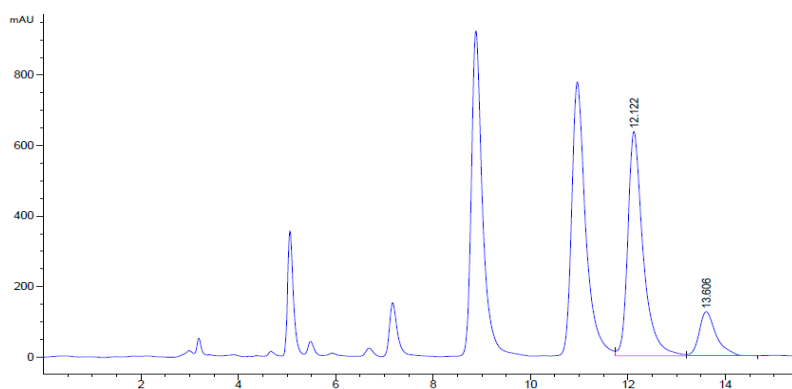

Signal 1: DAD1 B, Sig=210,4 Ref=360,100

| Peak # | RetTime [min] | Type | Width [min] | Area [mAU*s] | Height [mAU] | Area %  |
|--------|---------------|------|-------------|--------------|--------------|---------|
| 1      | 12.122        | VV   | 0.3223      | 1.38806e4    | 636.76221    | 82.0942 |
| 2      | 13.606        | VB   | 0.3598      | 3027.53003   | 125.34208    | 17.9058 |

Totals : 1.69081e4 762.10429

## 2-[Hydroxy-(phenyl)-methyl]-cyclopentanone



Table 2, Entry 1, Catalyst 4

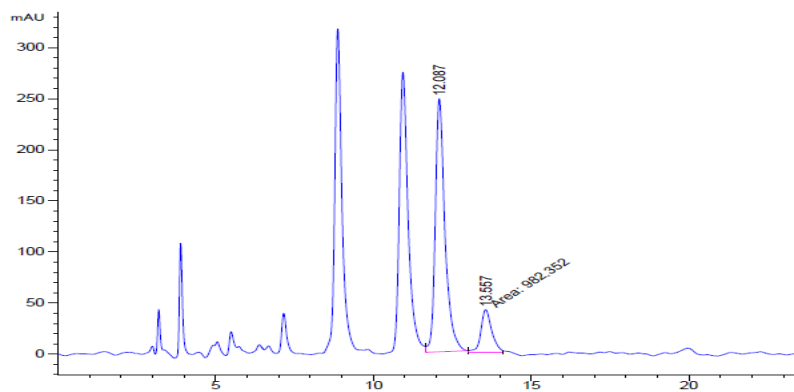

Signal 1: DAD1 B, Sig=210,4 Ref=360,100

| Peak # | RetTime [min] | Type | Width [min] | Area [mAU*s] | Height [mAU] | Area %  |
|--------|---------------|------|-------------|--------------|--------------|---------|
| 1      | 12.087        | VB   | 0.3154      | 5300.89697   | 247.97881    | 84.3655 |
| 2      | 13.557        | MM   | 0.3943      | 982.35150    | 41.52491     | 15.6345 |

Totals : 6283.24847 289.50372

Table 1, Entry 1, Catalyst 5

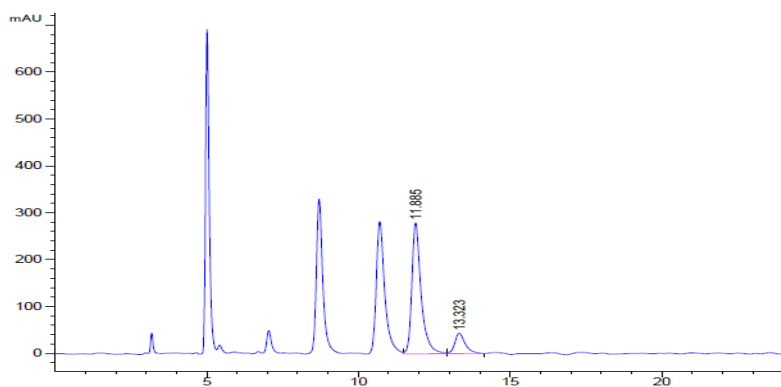

Signal 1: DAD1 B, Sig=210,4 Ref=360,100

| Peak # | RetTime [min] | Type | Width [min] | Area [mAU*s] | Height [mAU] | Area %  |
|--------|---------------|------|-------------|--------------|--------------|---------|
| 1      | 11.885        | VV   | 0.3143      | 5959.23193   | 280.05145    | 85.0133 |
| 2      | 13.323        | VB   | 0.3571      | 1050.53479   | 43.60067     | 14.9867 |

Totals : 7009.76672 323.65212

## 2-[Hydroxy-(phenyl)-methyl]-cyclopentanone



Table 3, Entry 6, Catalyst 16

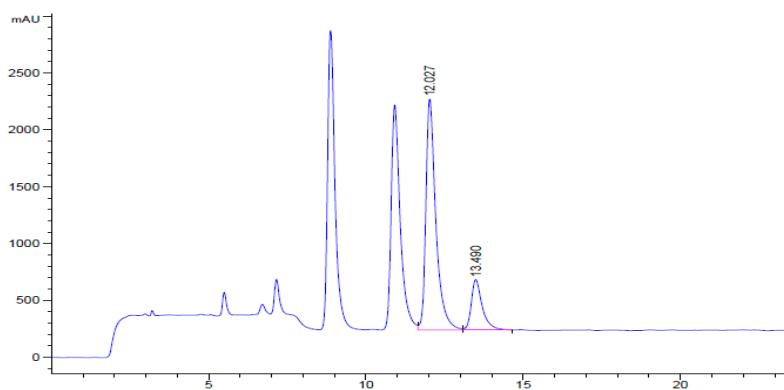

Signal 1: DAD1 B, Sig=210,4 Ref=360,100

| Peak # | RetTime [min] | Type | Width [min] | Area [mAU*s] | Height [mAU] | Area %  |
|--------|---------------|------|-------------|--------------|--------------|---------|
| 1      | 12.027        | VV   | 0.3272      | 4.47521e4    | 2030.26294   | 80.6483 |
| 2      | 13.490        | VB   | 0.3562      | 1.07383e4    | 443.96396    | 19.3517 |

Totals : 5.54904e4 2474.22690

## 2-[Hydroxy-(4-bromo-phenyl)-methyl]-cyclopentanone

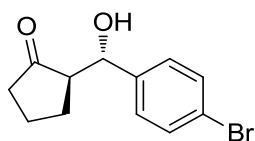

Racemate

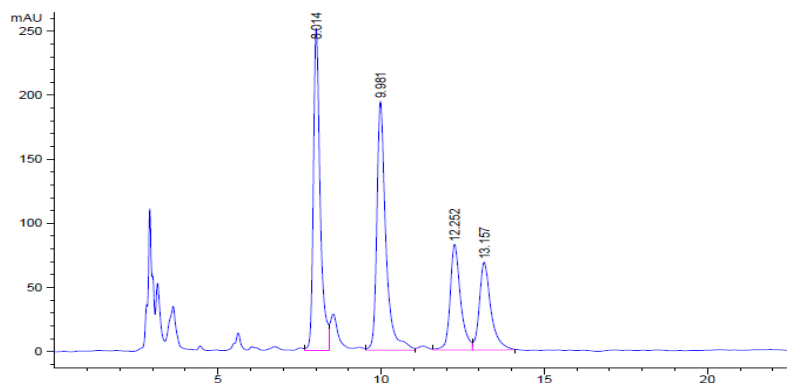

| Peak # | RetTime [min] | Type | Width [min] | Area [mAU*s] | Height [mAU] | Area %  |
|--------|---------------|------|-------------|--------------|--------------|---------|
| 1      | 8.014         | VV   | 0.2168      | 3635.32544   | 251.24251    | 33.4384 |
| 2      | 9.981         | VB   | 0.2835      | 3721.97803   | 194.30759    | 34.2355 |
| 3      | 12.252        | VV   | 0.3287      | 1830.25940   | 82.53169     | 16.8351 |
| 4      | 13.157        | VB   | 0.3628      | 1684.13660   | 68.50395     | 15.4910 |

Totals : 1.08717e4 596.58574

Table 2, Entry 2, Catalyst 1

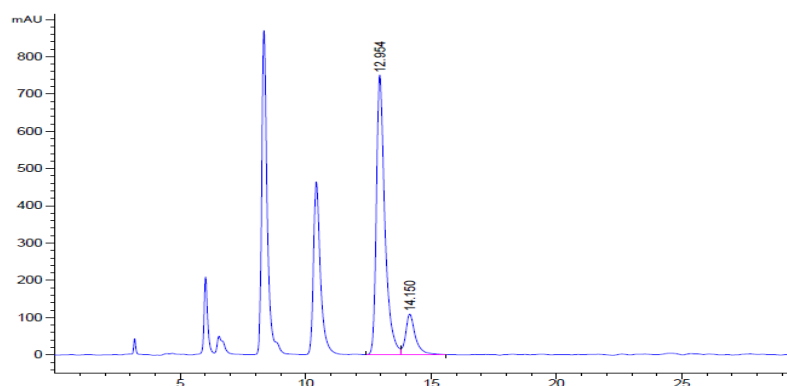

Signal 1: DAD1 B, Sig=210,4 Ref=360,100

| Peak # | RetTime [min] | Type | Width [min] | Area [mAU*s] | Height [mAU] | Area %  |
|--------|---------------|------|-------------|--------------|--------------|---------|
| 1      | 12.954        | BV   | 0.3481      | 1.76408e4    | 750.73376    | 85.7326 |
| 2      | 14.150        | VB   | 0.3947      | 2935.73901   | 108.85099    | 14.2674 |

Totals : 2.05765e4 859.58475



## 2-[Hydroxy-(4-bromo-phenyl)-methyl]-cyclopentanone

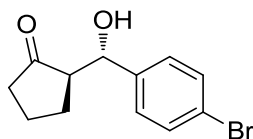

Table 2, Entry 2, Catalyst 2

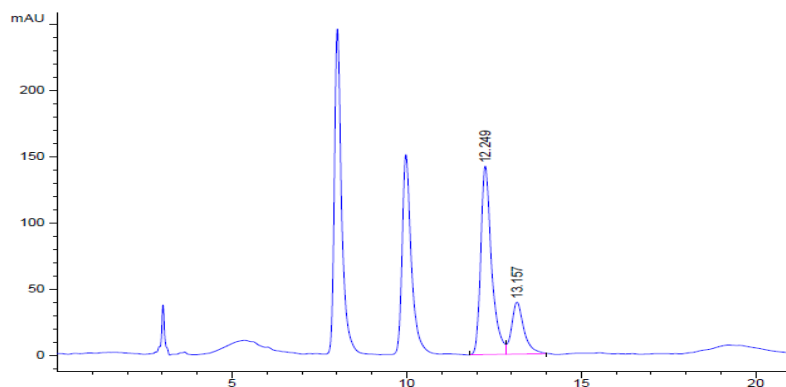

Signal 1: DAD1 B, Sig=210,4 Ref=360,100

| Peak # | RetTime [min] | Type | Width [min] | Area [mAU*s] | Height [mAU] | Area %  |
|--------|---------------|------|-------------|--------------|--------------|---------|
| 1      | 12.249        | BV   | 0.3212      | 3066.74878   | 142.41505    | 76.0788 |
| 2      | 13.157        | VB   | 0.3614      | 964.26501    | 39.41864     | 23.9212 |

Totals : 4031.01379 181.83369

Table 2, Entry 2, Catalyst 3

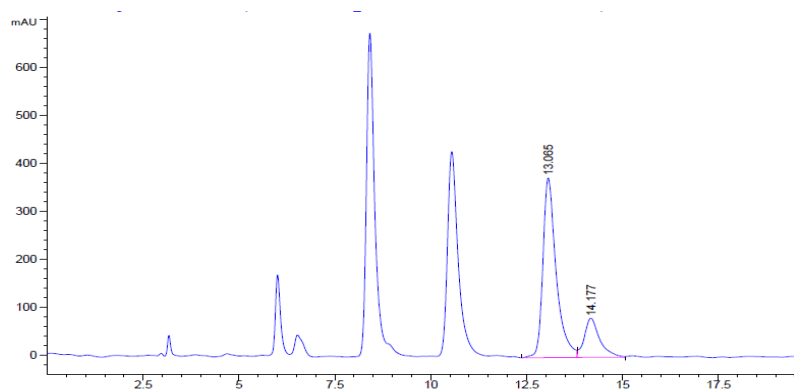

Signal 1: DAD1 B, Sig=210,4 Ref=360,100

| Peak # | RetTime [min] | Type | Width [min] | Area [mAU*s] | Height [mAU] | Area %  |
|--------|---------------|------|-------------|--------------|--------------|---------|
| 1      | 13.065        | BV   | 0.3551      | 9039.16797   | 375.16849    | 79.7610 |
| 2      | 14.177        | VV   | 0.4077      | 2293.65186   | 82.15737     | 20.2390 |

Totals : 1.13328e4 457.32586

## 2-[Hydroxy-(4-bromo-phenyl)-methyl]-cyclopentanone

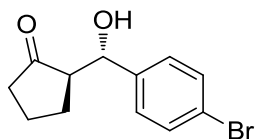

Table 2, Entry 2, Catalyst 4

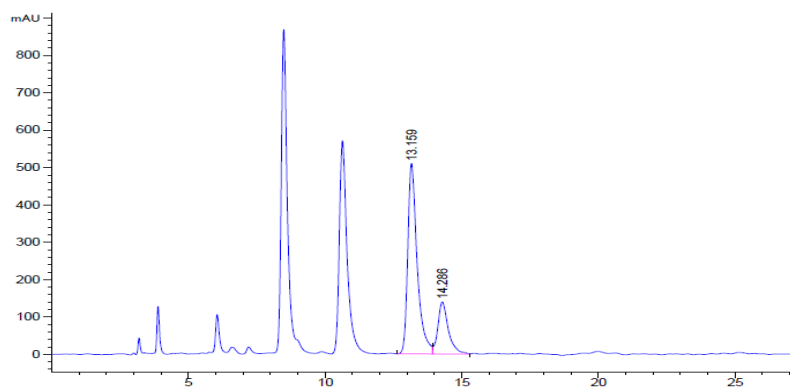

Signal 1: DAD1 B, Sig=210,4 Ref=360,100

| Peak # | RetTime [min] | Type | Width [min] | Area [mAU*s] | Height [mAU] | Area %  |
|--------|---------------|------|-------------|--------------|--------------|---------|
| 1      | 13.159        | BV   | 0.3551      | 1.22047e4    | 510.23578    | 76.5758 |
| 2      | 14.286        | VV   | 0.3939      | 3733.36450   | 139.65157    | 23.4242 |

Totals : 1.59380e4 649.88734

Table 2, Entry 2, Catalyst 5

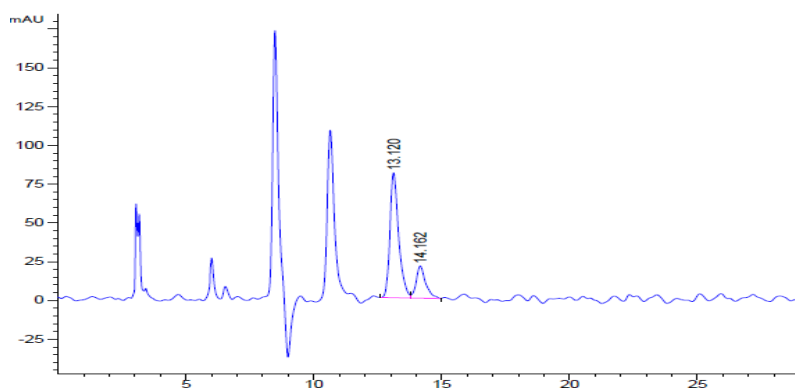

Signal 1: DAD1 B, Sig=210,4 Ref=360,100

| Peak # | RetTime [min] | Type | Width [min] | Area [mAU*s] | Height [mAU] | Area %  |
|--------|---------------|------|-------------|--------------|--------------|---------|
| 1      | 13.120        | BV   | 0.3521      | 1906.72095   | 80.57981     | 78.2213 |
| 2      | 14.162        | VB   | 0.3765      | 530.87738    | 20.74697     | 21.7787 |

Totals : 2437.59833 101.32678

## 2-[Hydroxy-(4-fluoro-phenyl)-methyl]-cyclopentanone

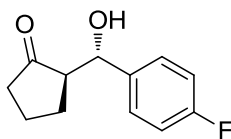

### Racemate

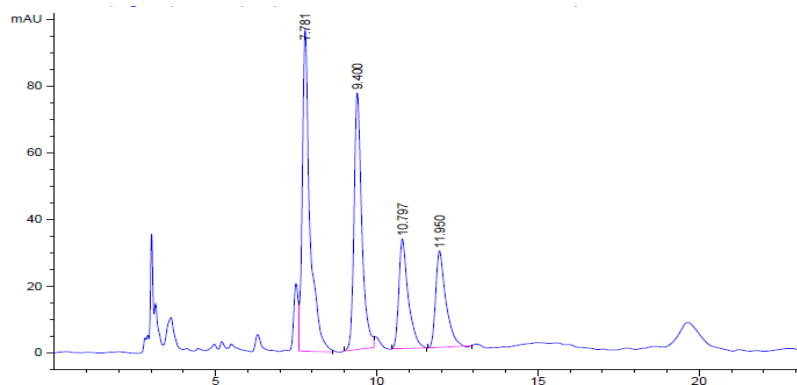

Signal 1: DAD1 B, Sig=210,4 Ref=360,100

| Peak # | RetTime [min] | Type | Width [min] | Area [mAU*s] | Height [mAU] | Area %  |
|--------|---------------|------|-------------|--------------|--------------|---------|
| 1      | 7.781         | VB   | 0.2343      | 1574.88477   | 96.54327     | 37.7562 |
| 2      | 9.400         | BB   | 0.2507      | 1298.56799   | 77.00474     | 31.1318 |
| 3      | 10.797        | BB   | 0.2939      | 664.95892    | 32.89122     | 15.9417 |
| 4      | 11.950        | BB   | 0.3191      | 632.78021    | 28.94192     | 15.1702 |

Totals : 4171.19189 235.38115

### Table 2, Entry 3, Catalyst 1

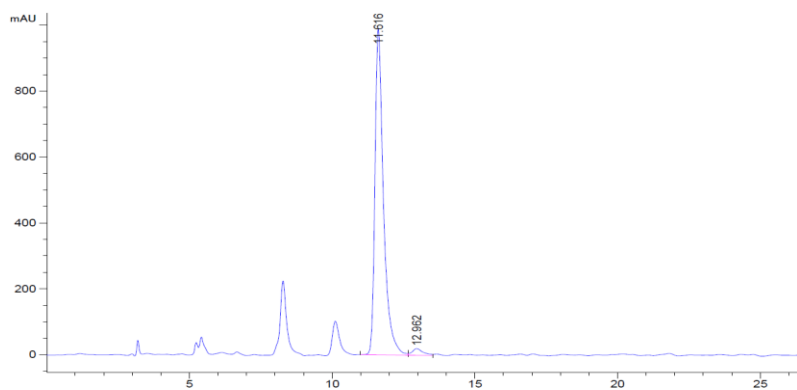

Signal 1: DAD1 B, Sig=210,4 Ref=360,100

| Peak # | RetTime [min] | Type | Width [min] | Area [mAU*s] | Height [mAU] | Area %  |
|--------|---------------|------|-------------|--------------|--------------|---------|
| 1      | 11.616        | BV   | 0.3068      | 2.05460e4    | 987.40698    | 97.4475 |
| 2      | 12.962        | VV   | 0.3775      | 538.16736    | 20.41842     | 2.5525  |

Totals : 2.10842e4 1007.82541

## 2-[Hydroxy-(4-fluoro-phenyl)-methyl]-cyclopentanone



Table 2, Entry 3, Catalyst 2

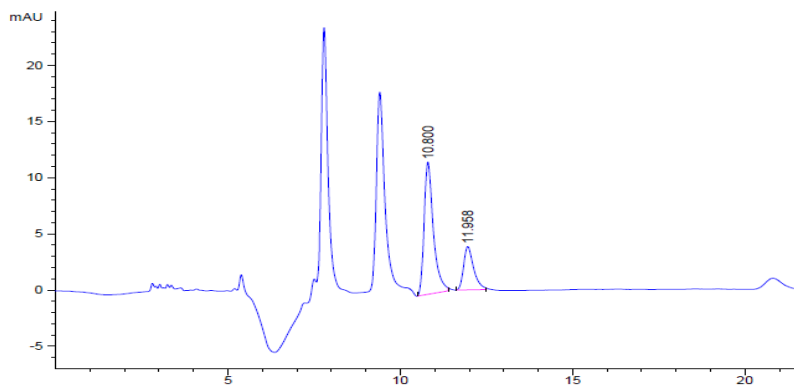

Signal 1: DAD1 A, Sig=256,4 Ref=360,100

| Peak #   | RetTime [min] | Type | Width [min] | Area [mAU*s] | Height [mAU] | Area %  |
|----------|---------------|------|-------------|--------------|--------------|---------|
| 1        | 10.800        | BB   | 0.2783      | 220.50552    | 11.78294     | 73.8500 |
| 2        | 11.958        | BB   | 0.3018      | 78.08017     | 3.86323      | 26.1500 |
| Totals : |               |      |             | 298.58569    | 15.64617     |         |

Table 2, Entry 3, Catalyst 3

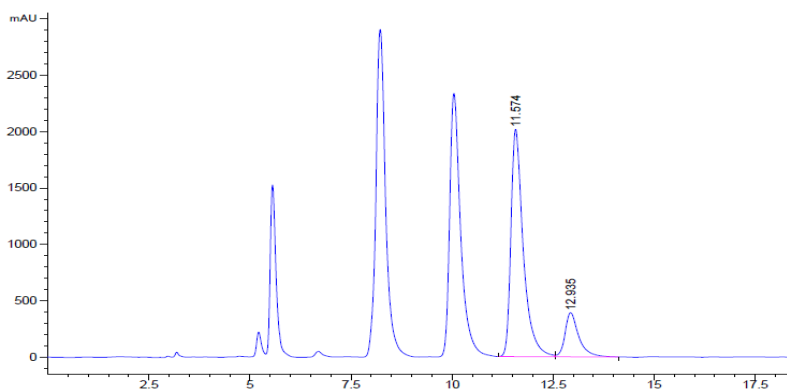

Signal 1: DAD1 B, Sig=210,4 Ref=360,100

| Peak #   | RetTime [min] | Type | Width [min] | Area [mAU*s] | Height [mAU] | Area %  |
|----------|---------------|------|-------------|--------------|--------------|---------|
| 1        | 11.574        | BV   | 0.3157      | 4.27724e4    | 2014.84033   | 82.3265 |
| 2        | 12.935        | VB   | 0.3457      | 9182.21094   | 391.39844    | 17.6735 |
| Totals : |               |      |             | 5.19546e4    | 2406.23877   |         |

## 2-[Hydroxy-(4-fluoro-phenyl)-methyl]-cyclopentanone

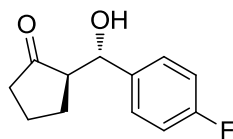

Table 2, Entry 3, Catalyst 4

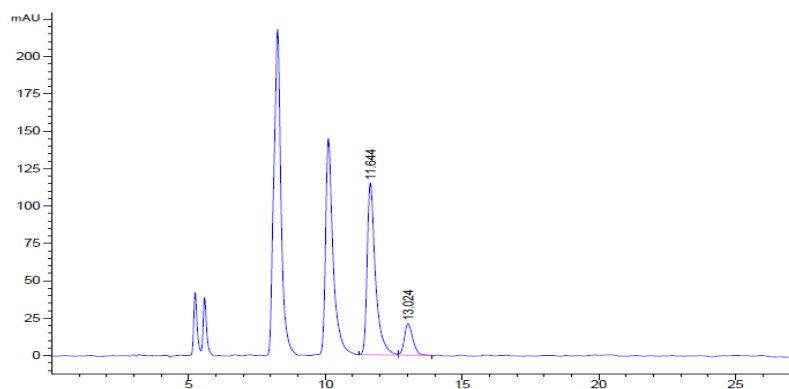

Signal 1: DAD1 A, Sig=254,4 Ref=360,100

| Peak # | RetTime [min] | Type | Width [min] | Area [mAU*s] | Height [mAU] | Area %  |
|--------|---------------|------|-------------|--------------|--------------|---------|
| 1      | 11.644        | BV   | 0.3091      | 2418.94678   | 115.12611    | 84.1014 |
| 2      | 13.024        | VB   | 0.3276      | 457.28101    | 21.20150     | 15.8986 |

Totals : 2876.22778 136.32761

Table 2, Entry 3, Catalyst 5

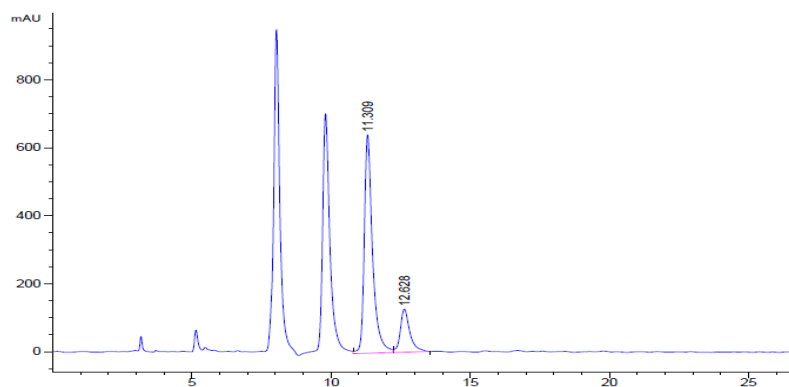

Signal 1: DAD1 B, Sig=210,4 Ref=360,100

| Peak # | RetTime [min] | Type | Width [min] | Area [mAU*s] | Height [mAU] | Area %  |
|--------|---------------|------|-------------|--------------|--------------|---------|
| 1      | 11.309        | VV   | 0.3055      | 1.33005e4    | 642.58447    | 81.6356 |
| 2      | 12.628        | VB   | 0.3472      | 2992.01196   | 126.82888    | 18.3644 |

Totals : 1.62925e4 769.41335

## 2-[Hydroxy-(4-fluoro-phenyl)-methyl]-cyclopentanone



Table 3, Entry 8, Catalyst 16

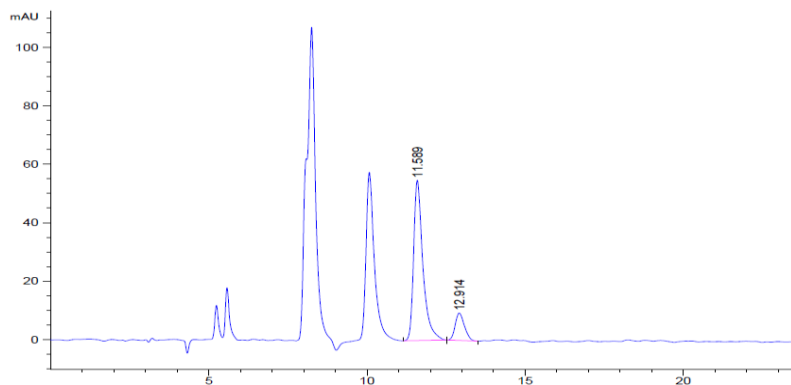

Signal 1: DAD1 C, Sig=260,4 Ref=360,100

| Peak # | RetTime [min] | Type | Width [min] | Area [mAU*s] | Height [mAU] | Area %  |
|--------|---------------|------|-------------|--------------|--------------|---------|
| 1      | 11.589        | BB   | 0.3039      | 1118.12842   | 54.84337     | 85.4568 |
| 2      | 12.914        | BB   | 0.3084      | 190.28459    | 9.38982      | 14.5432 |

Totals : 1308.41301 64.23319

## 2-[Hydroxy-(4-nitro-phenyl)-methyl]-cyclopentanone

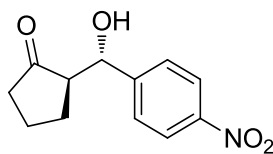

### Racemate

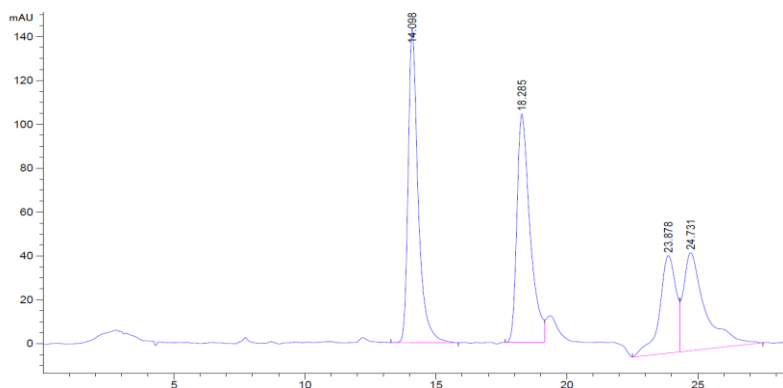

Signal 1: DAD1 C, Sig=260,4 Ref=360,100

| Peak # | RetTime [min] | Type | Width [min] | Area [mAU*s] | Height [mAU] | Area %  |
|--------|---------------|------|-------------|--------------|--------------|---------|
| 1      | 14.098        | BB   | 0.3928      | 3792.53906   | 143.28381    | 31.7199 |
| 2      | 18.285        | BV   | 0.5170      | 3617.49316   | 104.19711    | 30.2559 |
| 3      | 23.878        | BV   | 0.6522      | 1946.36365   | 44.51057     | 16.2789 |
| 4      | 24.731        | VB   | 0.8171      | 2599.93848   | 44.66543     | 21.7453 |

Totals : 1.19563e4 336.65693

### Table 2, Entry 4, Catalyst 1

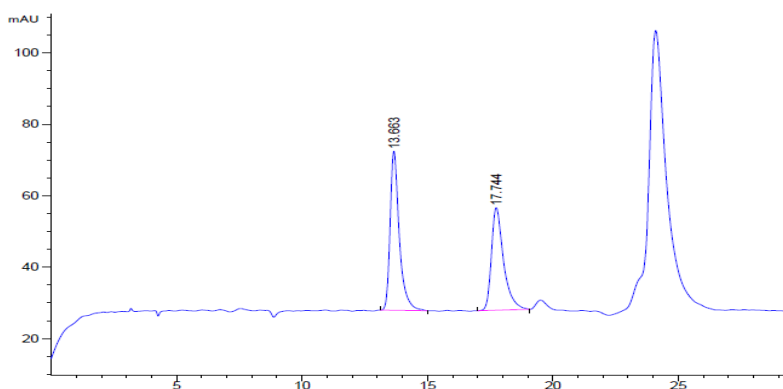

Signal 1: DAD1 A, Sig=254,4 Ref=360,100

| Peak # | RetTime [min] | Type | Width [min] | Area [mAU*s] | Height [mAU] | Area %  |
|--------|---------------|------|-------------|--------------|--------------|---------|
| 1      | 13.663        | BB   | 0.3788      | 1134.67493   | 44.59967     | 53.9982 |
| 2      | 17.744        | BB   | 0.5009      | 966.64355    | 28.70624     | 46.0018 |

Totals : 2101.31848 73.30591

## 2-[Hydroxy-(4-nitro-phenyl)-methyl]-cyclopentanone



Table 2, Entry 4, Catalyst 2

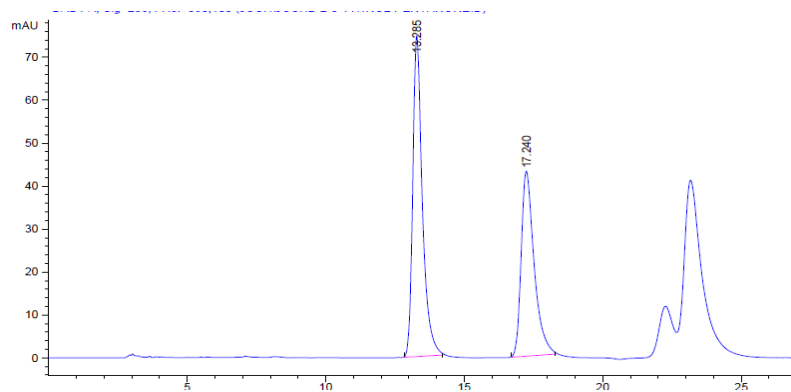

Signal 1: DAD1 A, Sig=256,4 Ref=360,100

| Peak # | RetTime [min] | Type | Width [min] | Area [mAU*s] | Height [mAU] | Area %  |
|--------|---------------|------|-------------|--------------|--------------|---------|
| 1      | 13.285        | BB   | 0.3600      | 1804.30042   | 74.63374     | 56.3304 |
| 2      | 17.240        | BB   | 0.4847      | 1398.76416   | 43.08734     | 43.6696 |

Totals : 3203.06458 117.72108

Table 2, Entry 4, Catalyst 3

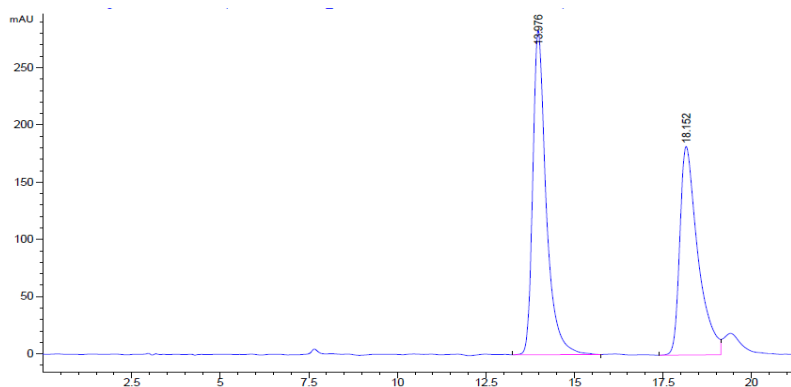

Signal 1: DAD1 A, Sig=254,4 Ref=360,100

| Peak # | RetTime [min] | Type | Width [min] | Area [mAU*s] | Height [mAU] | Area %  |
|--------|---------------|------|-------------|--------------|--------------|---------|
| 1      | 13.976        | BB   | 0.3920      | 7480.90332   | 283.38196    | 53.7163 |
| 2      | 18.152        | BV   | 0.5209      | 6445.79834   | 182.14673    | 46.2837 |

Totals : 1.39267e4 465.52869



## 2-[Hydroxy-(4-nitro-phenyl)-methyl]-cyclopentanone



Table 2, Entry 4, Catalyst 4

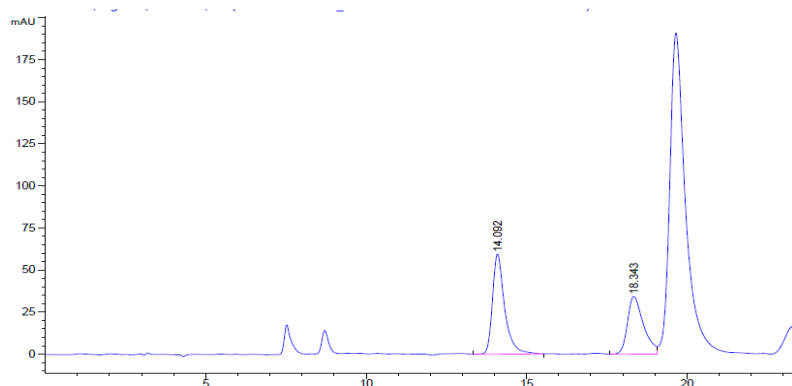

Signal 1: DAD1 A, Sig=254,4 Ref=360,100

| Peak # | RetTime [min] | Type | Width [min] | Area [mAU*s] | Height [mAU] | Area %  |
|--------|---------------|------|-------------|--------------|--------------|---------|
| 1      | 14.092        | BB   | 0.3949      | 1573.83228   | 59.44992     | 57.0028 |
| 2      | 18.343        | BV   | 0.5179      | 1187.13977   | 34.29309     | 42.9972 |

Totals : 2760.97205 93.74301

Table 2, Entry 4, Catalyst 5

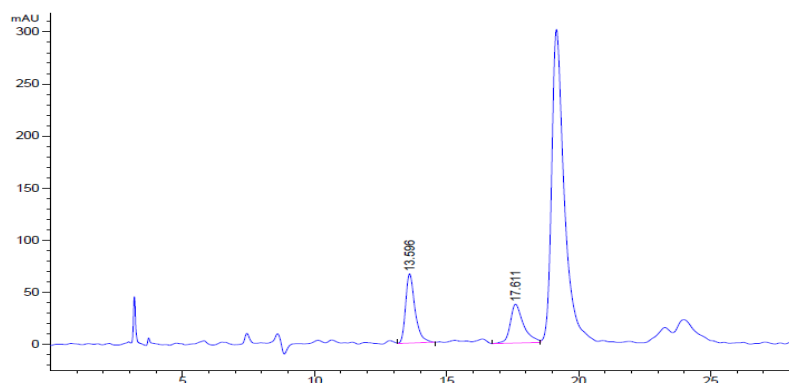

Signal 1: DAD1 B, Sig=210,4 Ref=360,100

| Peak # | RetTime [min] | Type | Width [min] | Area [mAU*s] | Height [mAU] | Area %  |
|--------|---------------|------|-------------|--------------|--------------|---------|
| 1      | 13.596        | VB   | 0.3729      | 1648.11609   | 66.54864     | 55.8640 |
| 2      | 17.611        | BV   | 0.5068      | 1302.11353   | 37.34649     | 44.1360 |

Totals : 2950.22961 103.89512

## 2-[Hydroxy-(4-nitro-phenyl)-methyl]-cyclopentanone



Table 3, Entry 7, Catalyst 16

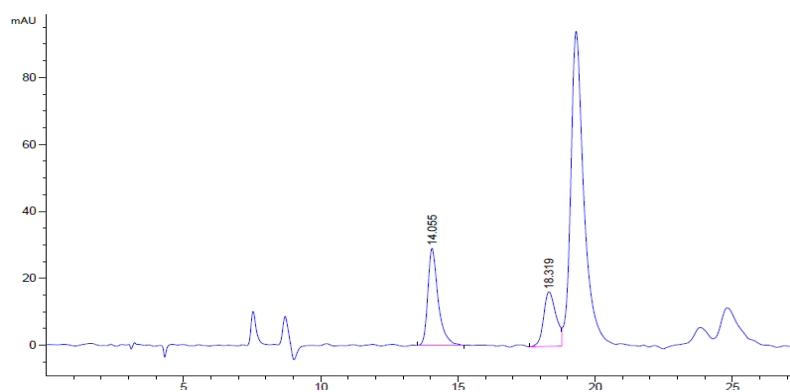

Signal 1: DAD1 A, Sig=254,4 Ref=360,100

| Peak # | RetTime [min] | Type | Width [min] | Area [mAU*s] | Height [mAU] | Area %  |
|--------|---------------|------|-------------|--------------|--------------|---------|
| 1      | 14.055        | BB   | 0.3887      | 757.66418    | 29.01055     | 59.6933 |
| 2      | 18.319        | BV   | 0.4729      | 511.59760    | 16.26625     | 40.3067 |

Totals : 1269.26178 45.27680

## 2-[Hydroxy-(3-nitro-phenyl)]-cyclopentanone

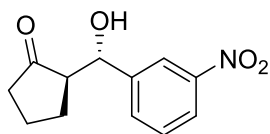

Racemate

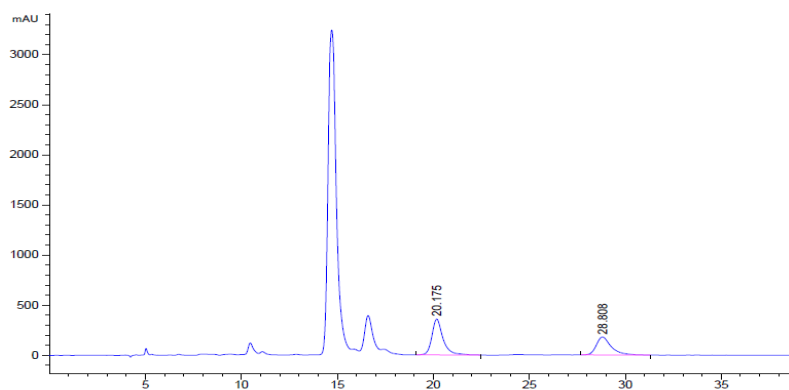

Signal 1: DAD1 C, Sig=260,4 Ref=360,100

| Peak # | RetTime [min] | Type | Width [min] | Area [mAU*s] | Height [mAU] | Area %  |
|--------|---------------|------|-------------|--------------|--------------|---------|
| 1      | 20.175        | BB   | 0.5923      | 1.43957e4    | 358.61813    | 59.8745 |
| 2      | 28.808        | BB   | 0.7969      | 9647.44629   | 179.53302    | 40.1255 |

Totals : 2.40432e4 538.15115

Table 2, Entry 5, Catalyst 1

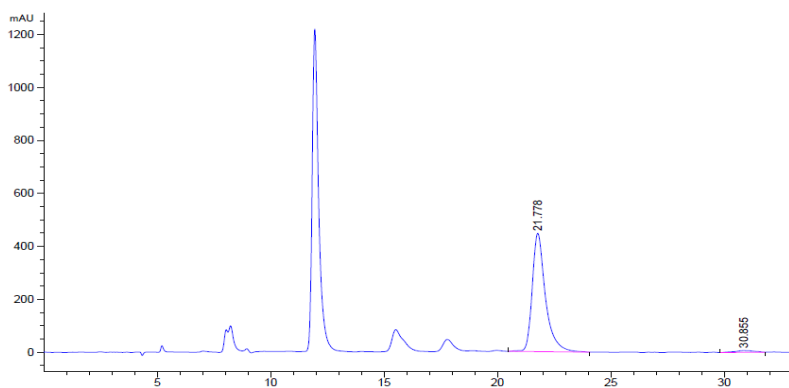

Signal 1: DAD1 A, Sig=254,4 Ref=360,100

| Peak # | RetTime [min] | Type | Width [min] | Area [mAU*s] | Height [mAU] | Area %  |
|--------|---------------|------|-------------|--------------|--------------|---------|
| 1      | 21.778        | BB   | 0.6034      | 1.81388e4    | 446.98816    | 97.8948 |
| 2      | 30.855        | BB   | 0.8734      | 390.06393    | 6.63934      | 2.1052  |

Totals : 1.85289e4 453.62749

## 2-[Hydroxy-(3-nitro-phenyl)]-cyclopentanone



Table 2, Entry 5, Catalyst 2

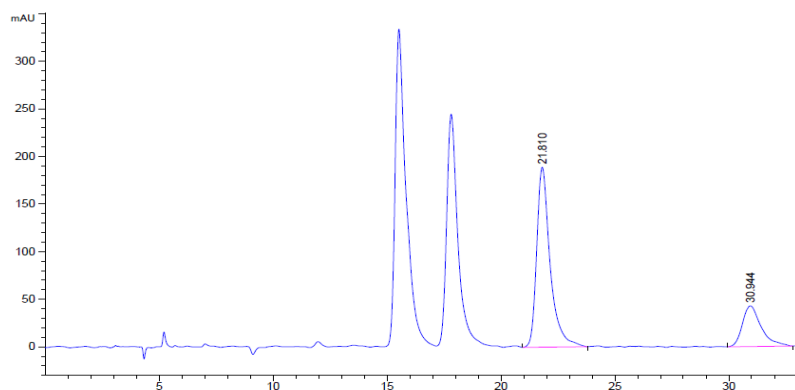

Signal 1: DAD1 A, Sig=254,4 Ref=360,100

| Peak # | RetTime [min] | Type | Width [min] | Area [mAU*s] | Height [mAU] | Area %  |
|--------|---------------|------|-------------|--------------|--------------|---------|
| 1      | 21.810        | BB   | 0.6098      | 7745.41357   | 189.13760    | 75.9866 |
| 2      | 30.944        | BB   | 0.8477      | 2447.71143   | 42.77121     | 24.0134 |

Totals : 1.01931e4 231.90882

Table 2, Entry 5, Catalyst 3

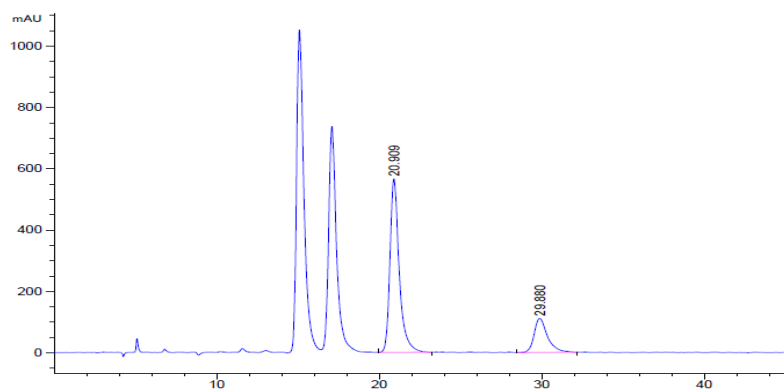

Signal 1: DAD1 A, Sig=254,4 Ref=360,100

| Peak # | RetTime [min] | Type | Width [min] | Area [mAU*s] | Height [mAU] | Area %  |
|--------|---------------|------|-------------|--------------|--------------|---------|
| 1      | 20.909        | BB   | 0.5931      | 2.24732e4    | 566.13184    | 77.9149 |
| 2      | 29.880        | BB   | 0.8589      | 6370.04297   | 111.10529    | 22.0851 |

Totals : 2.88432e4 677.23712

## 2-[Hydroxy-(3-nitro-phenyl)]-cyclopentanone



Table 2, Entry 5, Catalyst 4

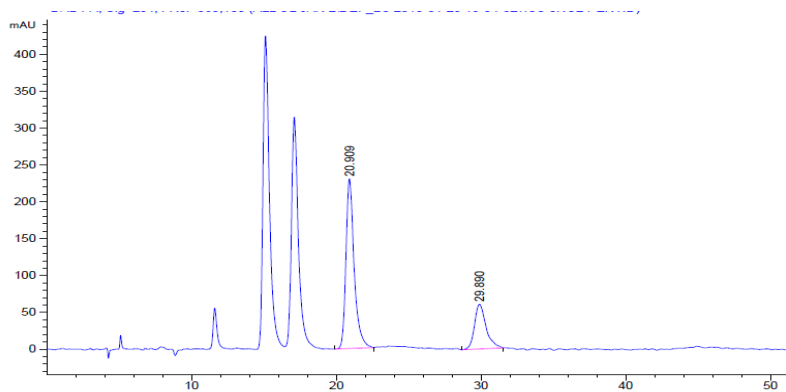

Signal 1: DAD1 A, Sig=254,4 Ref=360,100

| Peak # | RetTime [min] | Type | Width [min] | Area [mAU*s] | Height [mAU] | Area %  |
|--------|---------------|------|-------------|--------------|--------------|---------|
| 1      | 20.909        | BB   | 0.5895      | 9061.52930   | 230.05556    | 72.8977 |
| 2      | 29.890        | BB   | 0.8459      | 3368.94238   | 60.66157     | 27.1023 |

Totals : 1.24305e4 290.71713

Table 2, Entry 5, Catalyst 5

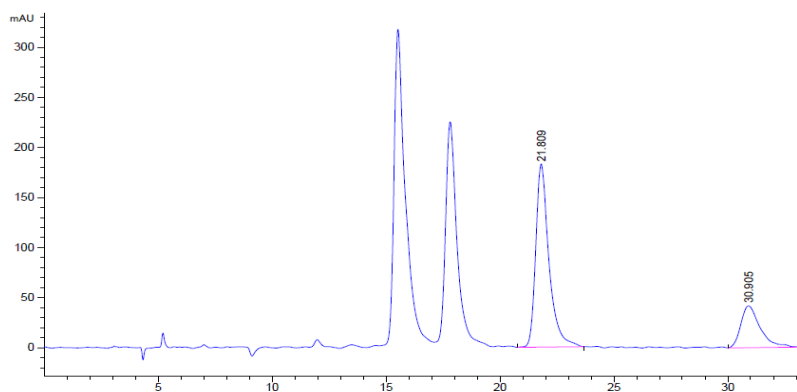

Signal 1: DAD1 A, Sig=254,4 Ref=360,100

| Peak # | RetTime [min] | Type | Width [min] | Area [mAU*s] | Height [mAU] | Area %  |
|--------|---------------|------|-------------|--------------|--------------|---------|
| 1      | 21.809        | BB   | 0.5983      | 7370.71191   | 182.84116    | 75.0064 |
| 2      | 30.905        | BB   | 0.8908      | 2456.06299   | 41.83992     | 24.9936 |

Totals : 9826.77490 224.68108

## 2-[Hydroxy-(2-nitro-phenyl)]-cyclopentanone

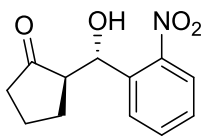

### Racemate

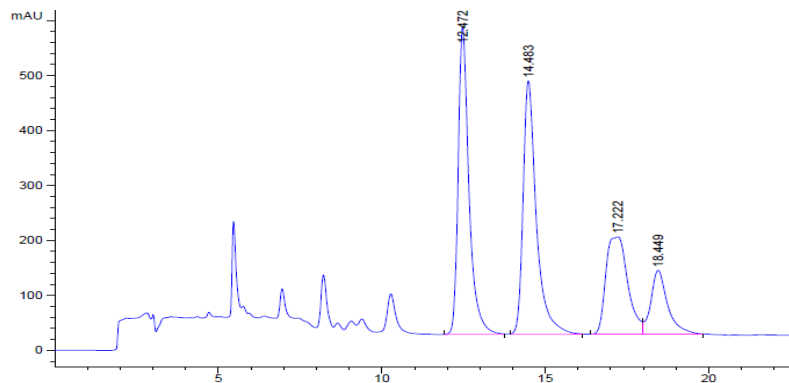

Signal 1: DAD1 B, Sig=210,4 Ref=360,100

| Peak # | RetTime [min] | Type | Width [min] | Area [mAU*s] | Height [mAU] | Area %  |
|--------|---------------|------|-------------|--------------|--------------|---------|
| 1      | 12.472        | BB   | 0.3413      | 1.28337e4    | 560.20288    | 33.6211 |
| 2      | 14.483        | BB   | 0.4162      | 1.29737e4    | 461.24097    | 33.9878 |
| 3      | 17.222        | BV   | 0.6228      | 8226.79688   | 177.48163    | 21.5521 |
| 4      | 18.449        | VB   | 0.5213      | 4137.42920   | 116.21823    | 10.8390 |

Totals : 3.81716e4 1315.14371

### Table 2, Entry 6, Catalyst 1

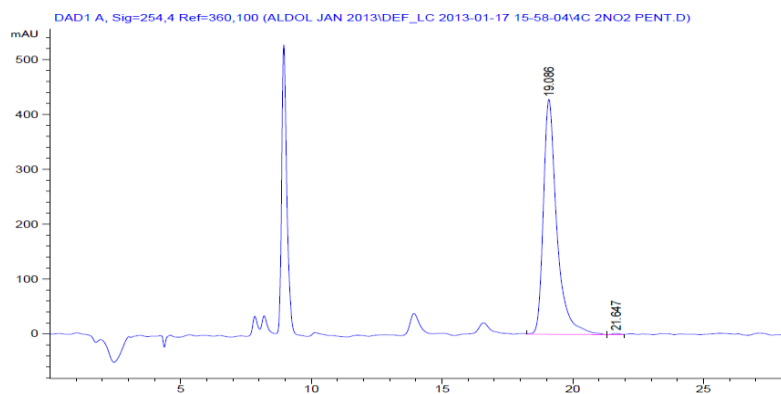

Signal 1: DAD1 A, Sig=254,4 Ref=360,100

| Peak # | RetTime [min] | Type | Width [min] | Area [mAU*s] | Height [mAU] | Area %  |
|--------|---------------|------|-------------|--------------|--------------|---------|
| 1      | 19.086        | VB   | 0.5339      | 1.53521e4    | 428.61487    | 99.7455 |
| 2      | 21.647        | BV   | 0.2806      | 39.16740     | 2.10967      | 0.2545  |

Totals : 1.53913e4 430.72454

## 2-[Hydroxy-(2-nitro-phenyl)]-cyclopentanone



Table 2, Entry 6, Catalyst 2

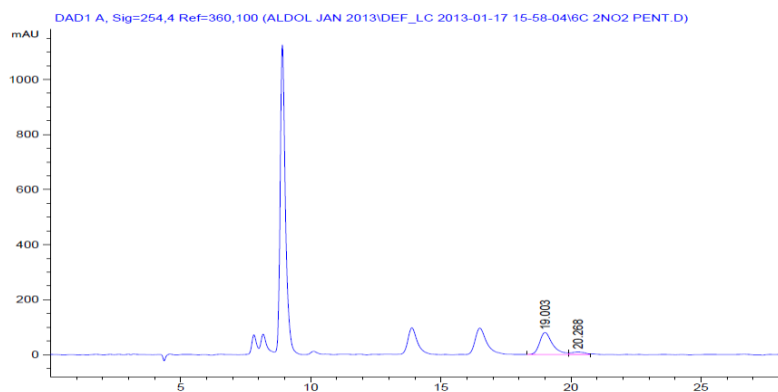

Signal 1: DAD1 A, Sig=254,4 Ref=360,100

| Peak # | RetTime [min] | Type | Width [min] | Area [mAU*s] | Height [mAU] | Area %  |
|--------|---------------|------|-------------|--------------|--------------|---------|
| 1      | 19.003        | BV   | 0.5143      | 2766.39233   | 80.21597     | 88.6703 |
| 2      | 20.268        | VV   | 0.5494      | 353.47192    | 10.17341     | 11.3297 |

Totals : 3119.86426 90.38937

Table 2, Entry 6, Catalyst 3

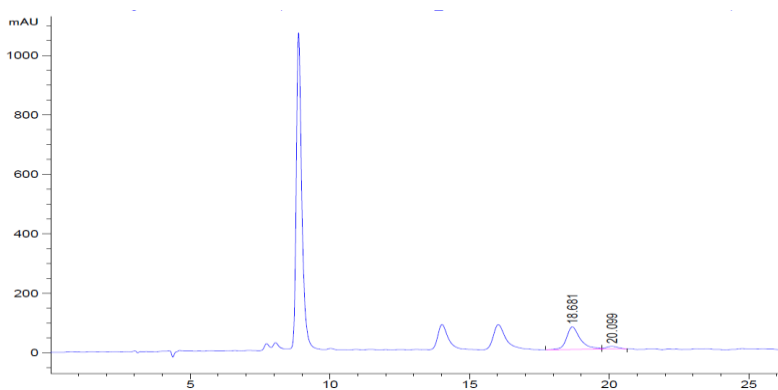

Signal 1: DAD1 A, Sig=254,4 Ref=360,100

| Peak # | RetTime [min] | Type | Width [min] | Area [mAU*s] | Height [mAU] | Area %  |
|--------|---------------|------|-------------|--------------|--------------|---------|
| 1      | 18.681        | BV   | 0.5020      | 2588.49976   | 75.87394     | 90.9397 |
| 2      | 20.099        | VB   | 0.4483      | 257.89047    | 8.94585      | 9.0603  |

Totals : 2846.39023 84.81979

## 2-[Hydroxy-(2-nitro-phenyl)]-cyclopentanone



Table 2, Entry 6, Catalyst 4

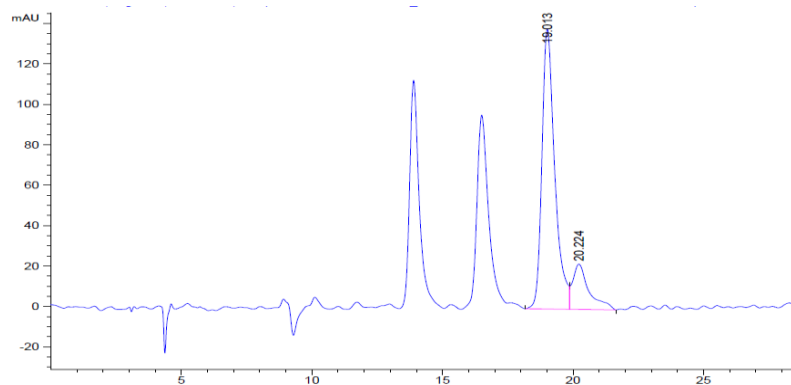

Signal 1: DAD1 A, Sig=254,4 Ref=360,100

| Peak # | RetTime [min] | Type | Width [min] | Area [mAU*s] | Height [mAU] | Area %  |
|--------|---------------|------|-------------|--------------|--------------|---------|
| 1      | 19.013        | BV   | 0.5107      | 4737.32568   | 138.61998    | 82.8496 |
| 2      | 20.224        | VB   | 0.6179      | 980.65588    | 22.43907     | 17.1504 |

Totals : 5717.98157 161.05905

Table 2, Entry 6, Catalyst 5

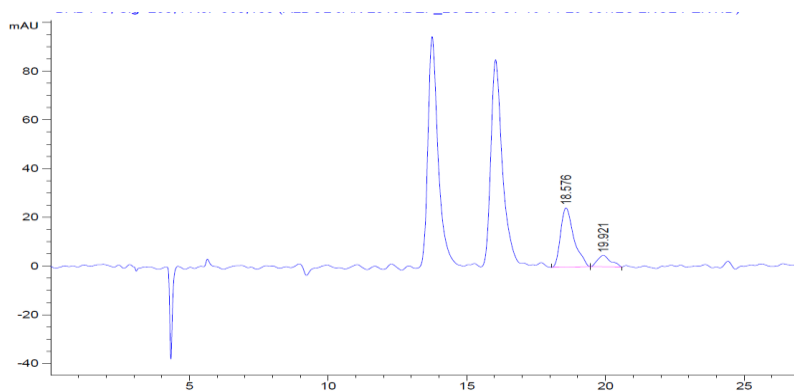

Signal 1: DAD1 G, Sig=280,4 Ref=360,100

| Peak # | RetTime [min] | Type | Width [min] | Area [mAU*s] | Height [mAU] | Area %  |
|--------|---------------|------|-------------|--------------|--------------|---------|
| 1      | 18.576        | BB   | 0.5046      | 808.86017    | 24.28157     | 84.1417 |
| 2      | 19.921        | BB   | 0.4737      | 152.44731    | 4.65918      | 15.8583 |

Totals : 961.30748 28.94075



## 2-[Hydroxy-(biphenyl)-methyl]-cyclopentanone

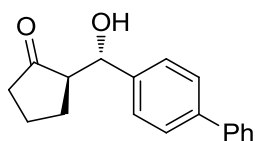

### Racemate

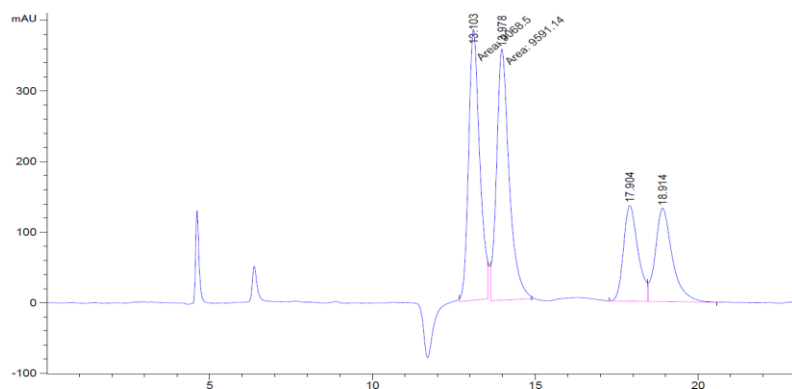

Signal 1: DAD1 A, Sig=254,4 Ref=360,100

| Peak # | RetTime [min] | Type | Width [min] | Area [mAU*s] | Height [mAU] | Area %  |
|--------|---------------|------|-------------|--------------|--------------|---------|
| 1      | 13.103        | MM   | 0.3941      | 9068.50000   | 383.53708    | 32.7777 |
| 2      | 13.978        | MM   | 0.4499      | 9591.14453   | 355.28961    | 34.6668 |
| 3      | 17.904        | BV   | 0.4700      | 4208.43164   | 135.63654    | 15.2112 |
| 4      | 18.914        | VB   | 0.5372      | 4798.58545   | 132.29437    | 17.3443 |

Totals : 2.76667e4 1006.75760

### Table 2, Entry 7, Catalyst 1

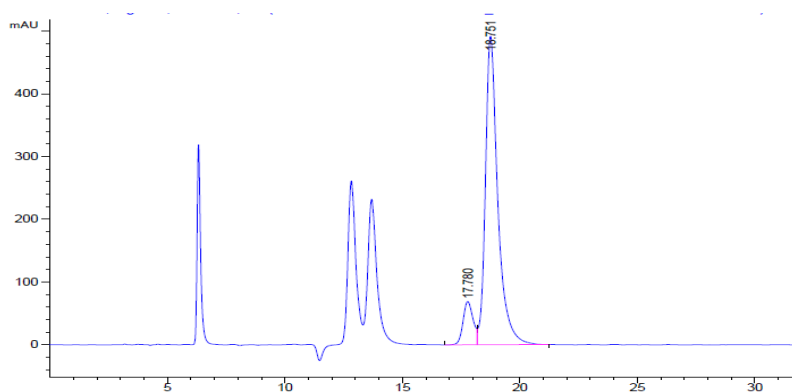

Signal 1: DAD1 A, Sig=254,4 Ref=360,100

| Peak # | RetTime [min] | Type | Width [min] | Area [mAU*s] | Height [mAU] | Area %  |
|--------|---------------|------|-------------|--------------|--------------|---------|
| 1      | 17.780        | BV   | 0.4514      | 2052.36597   | 68.91732     | 10.2152 |
| 2      | 18.751        | VB   | 0.5417      | 1.80388e4    | 492.11285    | 89.7848 |

Totals : 2.00912e4 561.03017

## 2-[Hydroxy-(biphenyl)-methyl]-cyclopentanone

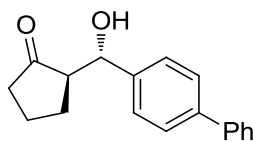

Table 2, Entry 7, Catalyst 2

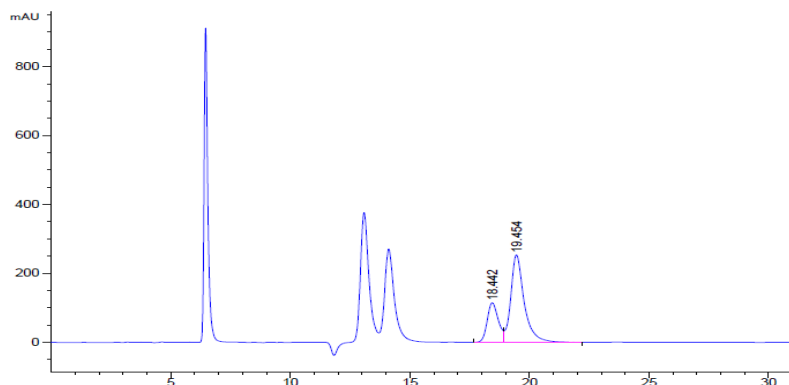

Signal 1: DAD1 A, Sig=254,4 Ref=360,100

| Peak # | RetTime [min] | Type | Width [min] | Area [mAU*s] | Height [mAU] | Area %  |
|--------|---------------|------|-------------|--------------|--------------|---------|
| 1      | 18.442        | BV   | 0.4925      | 3714.95728   | 114.49740    | 27.3624 |
| 2      | 19.454        | VB   | 0.5716      | 9861.89258   | 253.65324    | 72.6376 |

Totals : 1.35768e4 368.15064

Table 2, Entry 7, Catalyst 3

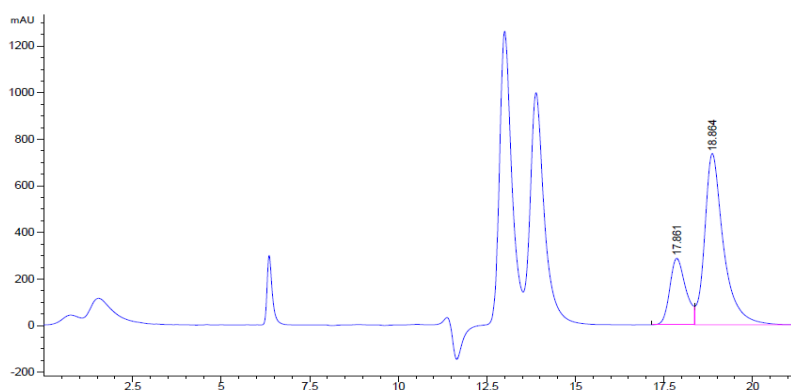

Signal 1: DAD1 A, Sig=254,4 Ref=360,100

| Peak # | RetTime [min] | Type | Width [min] | Area [mAU*s] | Height [mAU] | Area %  |
|--------|---------------|------|-------------|--------------|--------------|---------|
| 1      | 17.861        | BV   | 0.4728      | 8931.35156   | 285.63715    | 24.6233 |
| 2      | 18.864        | VB   | 0.5459      | 2.73406e4    | 735.07385    | 75.3767 |

Totals : 3.62720e4 1020.71100

## 2-[Hydroxy-(biphenyl)-methyl]-cyclopentanone

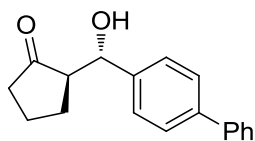

Table 2, Entry 7, Catalyst 4

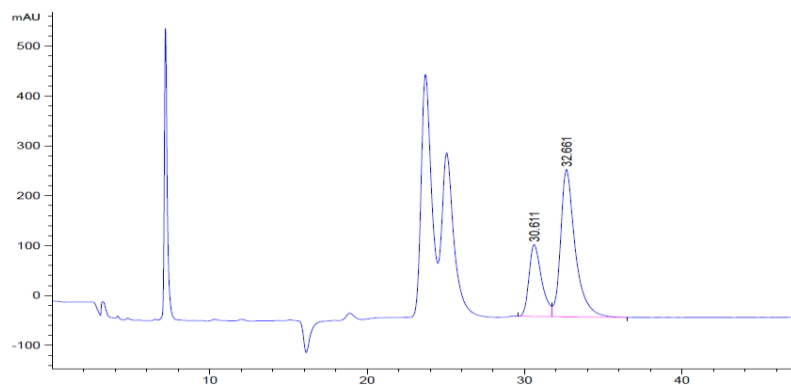

Signal 1: DAD1 A, Sig=254,4 Ref=360,100

| Peak # | RetTime [min] | Type | Width [min] | Area [mAU*s] | Height [mAU] | Area %  |
|--------|---------------|------|-------------|--------------|--------------|---------|
| 1      | 30.611        | BV   | 0.8416      | 8044.42188   | 144.02803    | 29.6980 |
| 2      | 32.661        | VB   | 0.9527      | 1.90430e4    | 295.16159    | 70.3020 |

Totals : 2.70875e4 439.18962

Table 2, Entry 7, Catalyst 5

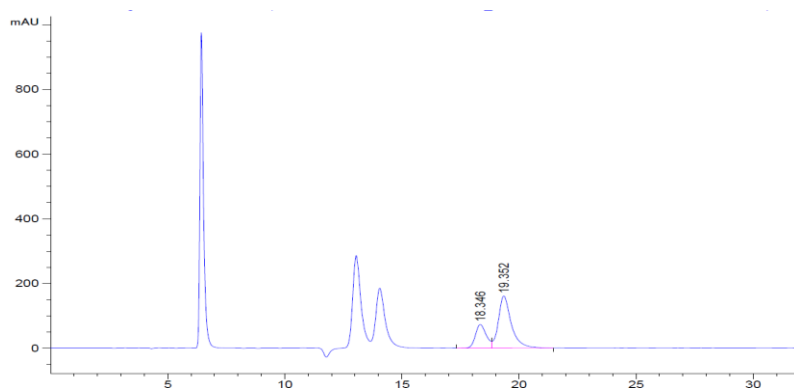

Signal 1: DAD1 A, Sig=254,4 Ref=360,100

| Peak # | RetTime [min] | Type | Width [min] | Area [mAU*s] | Height [mAU] | Area %  |
|--------|---------------|------|-------------|--------------|--------------|---------|
| 1      | 18.346        | BV   | 0.4843      | 2347.13037   | 73.15690     | 27.5070 |
| 2      | 19.352        | VB   | 0.5658      | 6185.71680   | 161.16283    | 72.4930 |

Totals : 8532.84717 234.31973

## 2-[Hydroxy-(4-bromo-phenyl)-methyl]-cyclohexanone

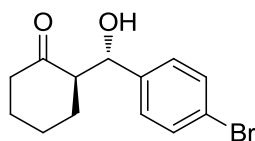

### Racemate

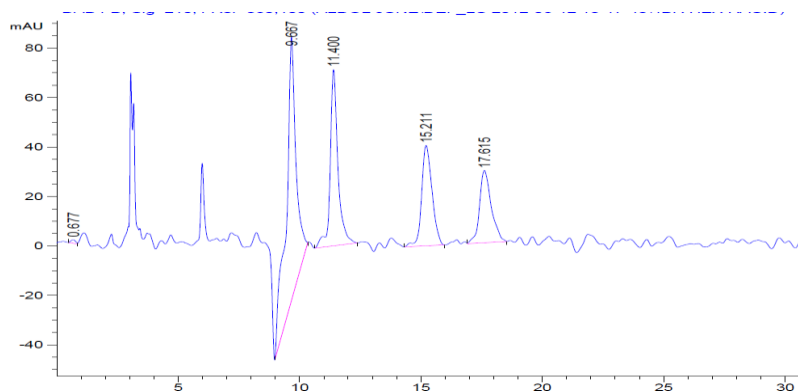

Signal 1: DAD1 B, Sig=210,4 Ref=360,100

| Peak # | RetTime [min] | Type | Width [min] | Area [mAU*s] | Height [mAU] | Area %  |
|--------|---------------|------|-------------|--------------|--------------|---------|
| 1      | 0.677         | BV   | 0.2188      | 18.99023     | 1.41325      | 0.2802  |
| 2      | 9.667         | BB   | 0.3809      | 2985.45020   | 106.55878    | 44.0564 |
| 3      | 11.400        | BB   | 0.3249      | 1582.24487   | 71.29802     | 23.3492 |
| 4      | 15.211        | BB   | 0.4610      | 1208.03052   | 40.61239     | 17.8270 |
| 5      | 17.615        | VB   | 0.5060      | 981.71234    | 29.22028     | 14.4872 |

Totals : 6776.42816 249.10273

### Table 2, Entry 8, Catalyst 1

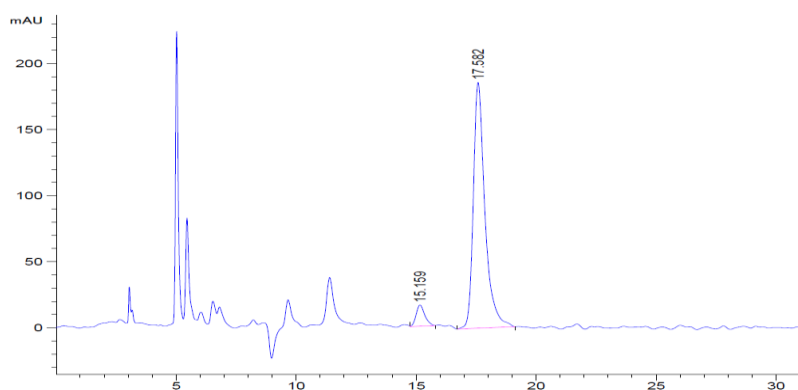

Signal 1: DAD1 D, Sig=230,4 Ref=360,100

| Peak # | RetTime [min] | Type | Width [min] | Area [mAU*s] | Height [mAU] | Area %  |
|--------|---------------|------|-------------|--------------|--------------|---------|
| 1      | 15.159        | VB   | 0.3803      | 402.20715    | 16.05486     | 6.0526  |
| 2      | 17.582        | BB   | 0.4995      | 6243.01123   | 186.05635    | 93.9474 |

Totals : 6645.21838 202.11121

## 2-[Hydroxy-(4-bromo-phenyl)-methyl]-cyclohexanone

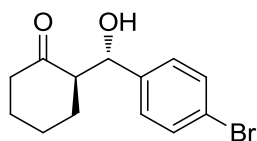

Table 2, Entry 8, Catalyst 2

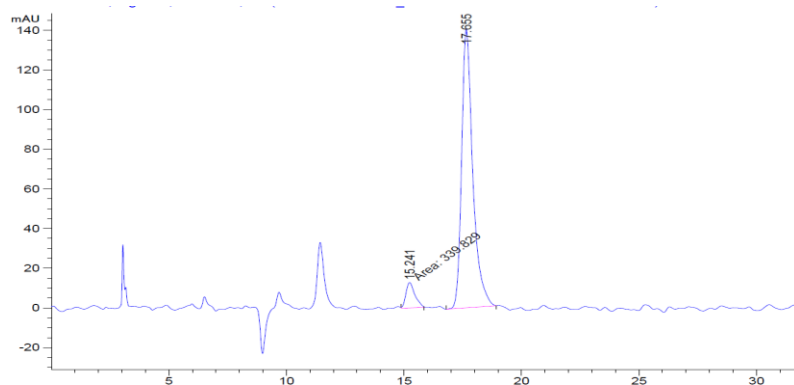

Signal 1: DAD1 D, Sig=230,4 Ref=360,100

| Peak # | RetTime [min] | Type | Width [min] | Area [mAU*s] | Height [mAU] | Area %  |
|--------|---------------|------|-------------|--------------|--------------|---------|
| 1      | 15.241        | MM   | 0.4413      | 339.82904    | 12.83379     | 6.8395  |
| 2      | 17.655        | BB   | 0.4927      | 4628.80664   | 140.37726    | 93.1605 |

Totals : 4968.63568 153.21105

Table 2, Entry 8, Catalyst 3

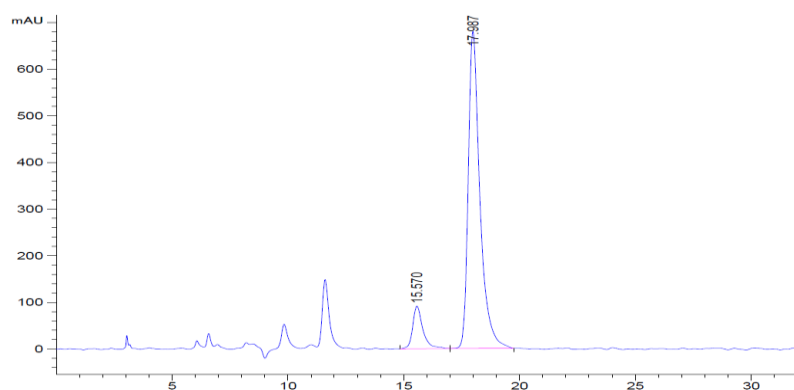

Signal 1: DAD1 D, Sig=230,4 Ref=360,100

| Peak # | RetTime [min] | Type | Width [min] | Area [mAU*s] | Height [mAU] | Area %  |
|--------|---------------|------|-------------|--------------|--------------|---------|
| 1      | 15.570        | BB   | 0.4513      | 2785.76172   | 91.47964     | 10.4978 |
| 2      | 17.987        | BB   | 0.5194      | 2.37509e4    | 680.21094    | 89.5022 |

Totals : 2.65367e4 771.69058

## 2-[Hydroxy-(4-bromo-phenyl)-methyl]-cyclohexanone



Table 2, Entry 8, Catalyst 4

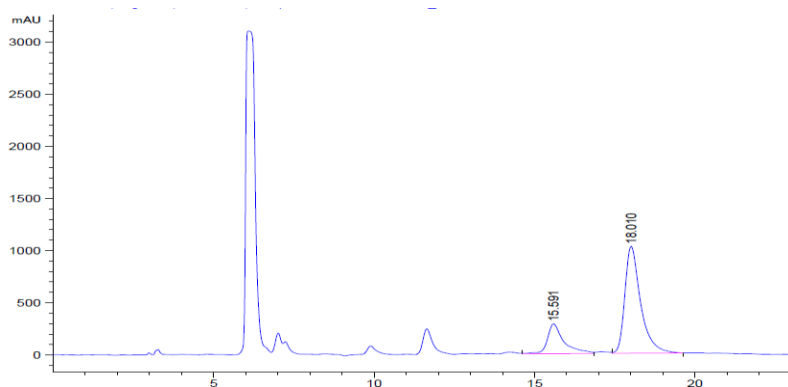

Signal 1: DAD1 B, Sig=210,4 Ref=360,100

| Peak # | RetTime [min] | Type | Width [min] | Area [mAU*s] | Height [mAU] | Area %  |
|--------|---------------|------|-------------|--------------|--------------|---------|
| 1      | 15.591        | VV   | 0.5057      | 1.01240e4    | 285.47794    | 22.4365 |
| 2      | 18.010        | VB   | 0.5083      | 3.49988e4    | 1025.06433   | 77.5635 |

Totals : 4.51228e4 1310.54227

Table 2, Entry 8, Catalyst 5

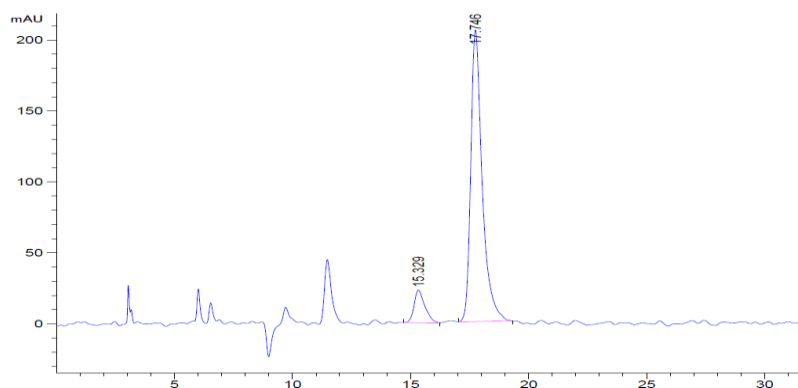

Signal 1: DAD1 D, Sig=230,4 Ref=360,100

| Peak # | RetTime [min] | Type | Width [min] | Area [mAU*s] | Height [mAU] | Area %  |
|--------|---------------|------|-------------|--------------|--------------|---------|
| 1      | 15.329        | BB   | 0.4578      | 717.78943    | 23.01823     | 9.4042  |
| 2      | 17.746        | BB   | 0.4982      | 6914.86963   | 205.68797    | 90.5958 |

Totals : 7632.65906 228.70620

## 2-[Hydroxy-(4-fluoro-phenyl)-methyl]-cyclohexanone

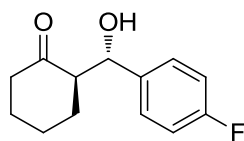

Racemate

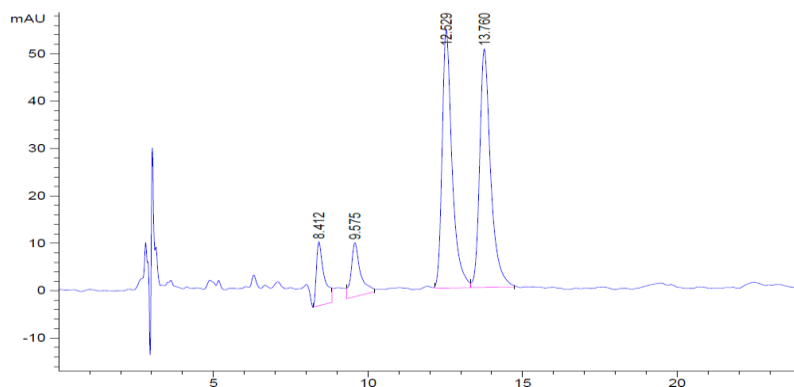

Signal 1: DAD1 B, Sig=210,4 Ref=360,100

| Peak # | RetTime [min] | Type | Width [min] | Area [mAU*s] | Height [mAU] | Area %  |
|--------|---------------|------|-------------|--------------|--------------|---------|
| 1      | 8.412         | VB   | 0.2505      | 233.07262    | 13.42521     | 7.9207  |
| 2      | 9.575         | BB   | 0.3017      | 239.56458    | 11.37315     | 8.1413  |
| 3      | 12.529        | BV   | 0.3286      | 1220.61682   | 54.63713     | 41.4810 |
| 4      | 13.760        | VB   | 0.3695      | 1249.33508   | 50.33954     | 42.4570 |

Table 2, Entry 9, Catalyst 1

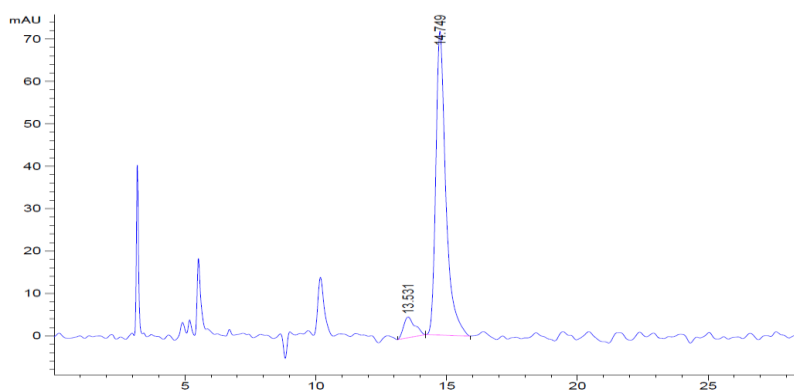

Signal 1: DAD1 B, Sig=210,4 Ref=360,100

| Peak # | RetTime [min] | Type | Width [min] | Area [mAU*s] | Height [mAU] | Area %  |
|--------|---------------|------|-------------|--------------|--------------|---------|
| 1      | 13.531        | BB   | 0.4352      | 146.62860    | 4.89894      | 7.1240  |
| 2      | 14.749        | BB   | 0.3950      | 1911.59973   | 71.70232     | 92.8760 |

Totals : 2058.22833 76.60126

## 2-[Hydroxy-(4-fluoro-phenyl)-methyl]-cyclohexanone

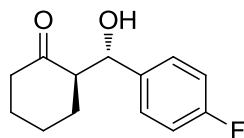

Table 2, Entry 9, Catalyst 2

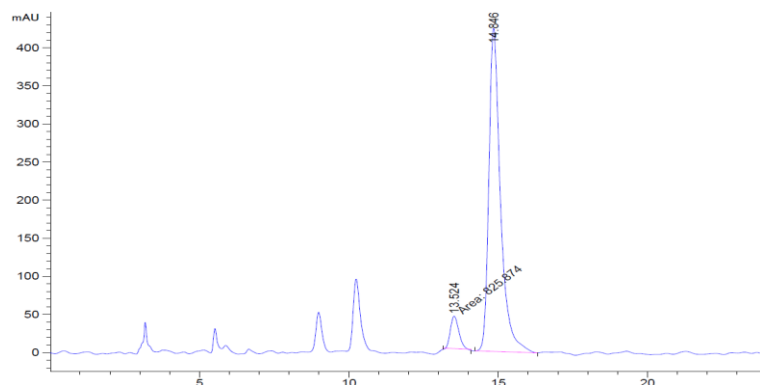

Signal 1: DAD1 B, Sig=210,4 Ref=360,100

| Peak # | RetTime [min] | Type | Width [min] | Area [mAU*s] | Height [mAU] | Area %  |
|--------|---------------|------|-------------|--------------|--------------|---------|
| 1      | 13.524        | MM   | 0.3238      | 825.87372    | 42.50507     | 6.7311  |
| 2      | 14.846        | BB   | 0.4009      | 1.14436e4    | 423.98584    | 93.2689 |

Totals : 1.22694e4 466.49091

Table 2, Entry 9, Catalyst 3

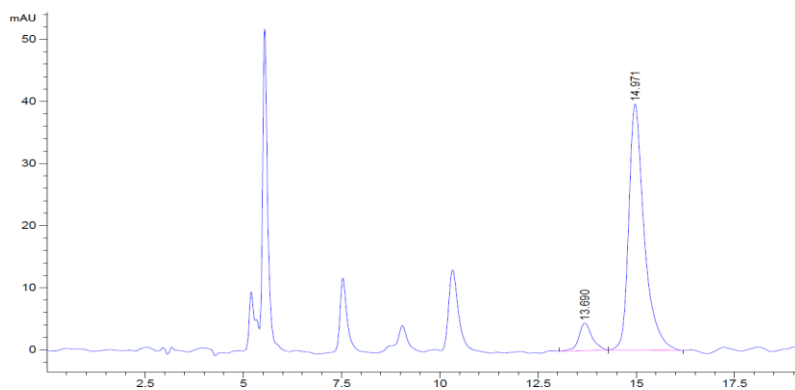

Signal 1: DAD1 A, Sig=254,4 Ref=360,100

| Peak # | RetTime [min] | Type | Width [min] | Area [mAU*s] | Height [mAU] | Area %  |
|--------|---------------|------|-------------|--------------|--------------|---------|
| 1      | 13.690        | BB   | 0.3497      | 103.81554    | 4.42519      | 8.7101  |
| 2      | 14.971        | BB   | 0.4062      | 1088.08960   | 39.64024     | 91.2899 |

Totals : 1191.90514 44.06544



## 2-[Hydroxy-(4-fluoro-phenyl)-methyl]-cyclohexanone



Table 2, Entry 9, Catalyst 4

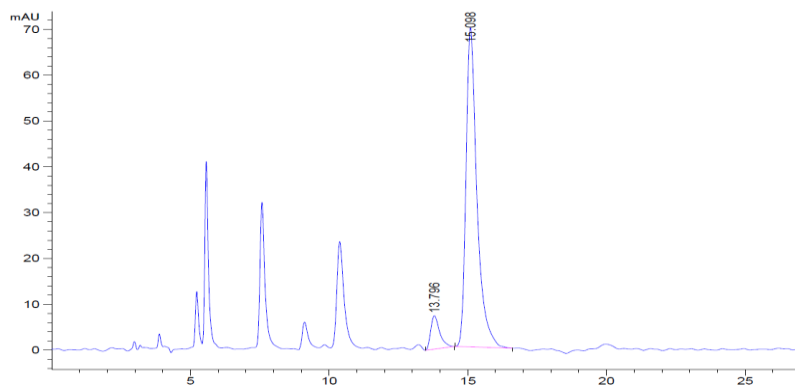

Signal 1: DAD1 A, Sig=254,4 Ref=360,100

| Peak # | RetTime [min] | Type | Width [min] | Area [mAU*s] | Height [mAU] | Area %  |
|--------|---------------|------|-------------|--------------|--------------|---------|
| 1      | 13.796        | BB   | 0.3408      | 164.35617    | 7.29572      | 7.9173  |
| 2      | 15.098        | BB   | 0.4082      | 1911.56091   | 69.65408     | 92.0827 |

Totals : 2075.91708 76.94980

Table 2, Entry 9, Catalyst 5

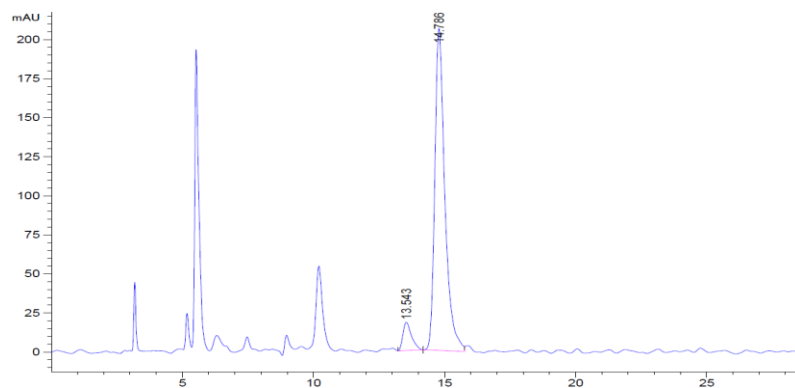

Signal 1: DAD1 B, Sig=210,4 Ref=360,100

| Peak # | RetTime [min] | Type | Width [min] | Area [mAU*s] | Height [mAU] | Area %  |
|--------|---------------|------|-------------|--------------|--------------|---------|
| 1      | 13.543        | BB   | 0.3411      | 411.32962    | 18.10303     | 6.9534  |
| 2      | 14.786        | BV   | 0.3976      | 5504.14941   | 206.10719    | 93.0466 |

Totals : 5915.47903 224.21022

## 2-[Hydroxy-(4-fluoro-phenyl)-methyl]-cyclohexanone



Table 3, Entry 5, Catalyst 16

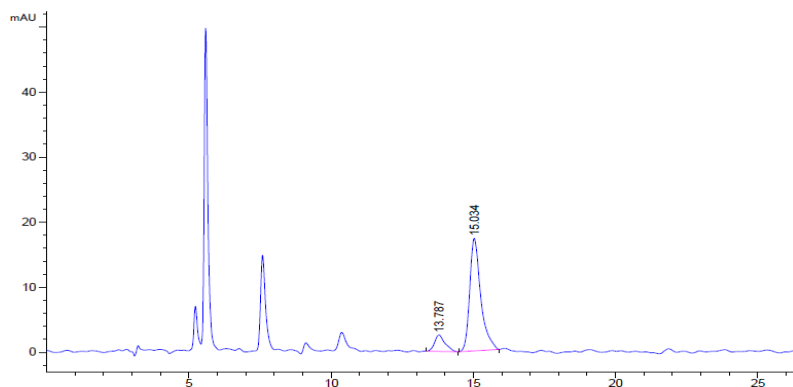

Signal 1: DAD1 A, Sig=254,4 Ref=360,100

| Peak #   | RetTime [min] | Type | Width [min] | Area [mAU*s] | Height [mAU] | Area %  |
|----------|---------------|------|-------------|--------------|--------------|---------|
| 1        | 13.787        | BB   | 0.3665      | 64.43161     | 2.53550      | 12.0913 |
| 2        | 15.034        | BB   | 0.4038      | 468.44385    | 17.30833     | 87.9087 |
| Totals : |               |      |             | 532.87546    | 19.84383     |         |

## 2-[Hydroxy-(4-nitro-phenyl)-methyl]-cyclohexanone

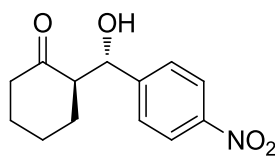

Racemate

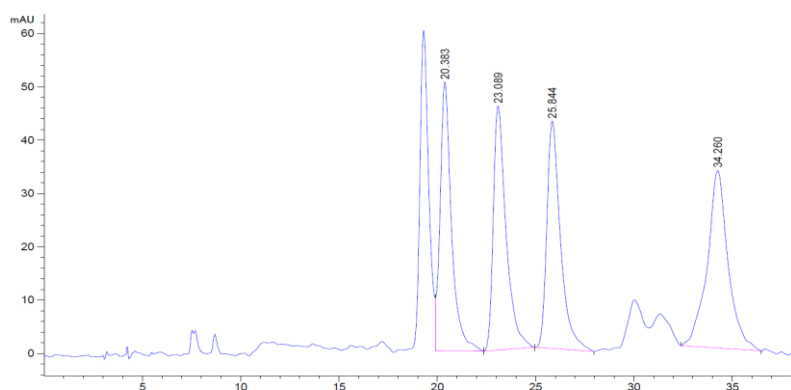

Signal 1: DAD1 A, Sig=254,4 Ref=360,100

| Peak # | RetTime [min] | Type | Width [min] | Area [mAU*s] | Height [mAU] | Area %  |
|--------|---------------|------|-------------|--------------|--------------|---------|
| 1      | 20.383        | VB   | 0.5924      | 2038.33252   | 50.34125     | 23.6846 |
| 2      | 23.089        | BB   | 0.6707      | 2065.04346   | 45.74075     | 23.9950 |
| 3      | 25.844        | BB   | 0.7174      | 2059.34912   | 42.64633     | 23.9288 |
| 4      | 34.260        | BB   | 1.0390      | 2443.42090   | 33.26344     | 28.3916 |

Totals : 8606.14600 171.99176

Table 2, Entry 10, Catalyst 1

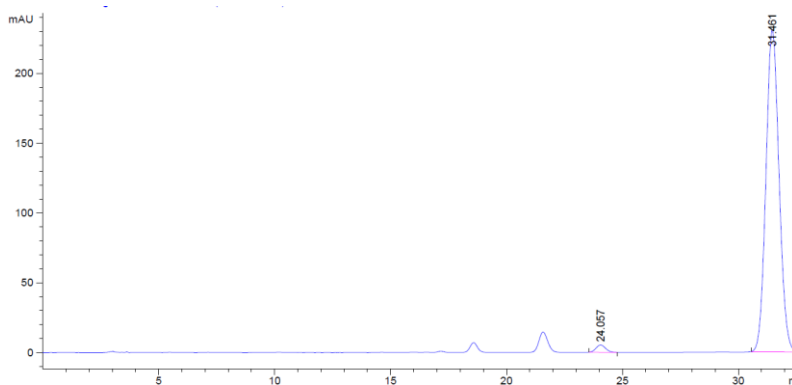

| Peak # | RetTime [min] | Type | Width [min] | Area [mAU*s] | Height [mAU] | Area %  |
|--------|---------------|------|-------------|--------------|--------------|---------|
| 1      | 24.057        | BB   | 0.4382      | 150.81140    | 5.26504      | 1.6356  |
| 2      | 31.461        | BB   | 0.6101      | 9069.78125   | 231.00755    | 98.3644 |

Totals : 9220.59265 236.27259

## 2-[Hydroxy-(4-nitro-phenyl)-methyl]-cyclohexanone



Table 2, Entry 10, Catalyst 2

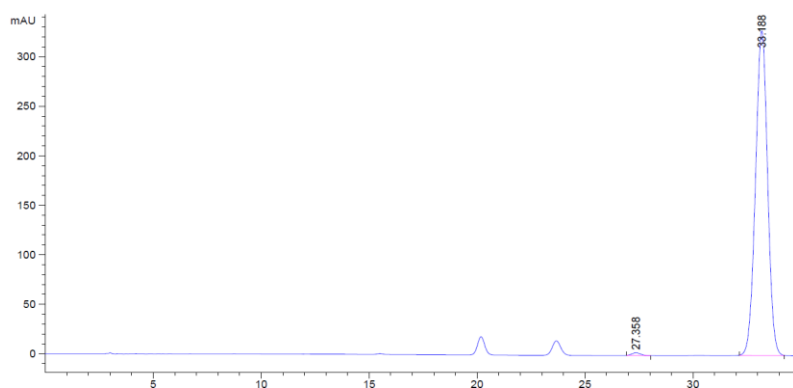

| Peak # | RetTime [min] | Type | Width [min] | Area [mAU*s] | Height [mAU] | Area %  |
|--------|---------------|------|-------------|--------------|--------------|---------|
| 1      | 27.358        | BB   | 0.4265      | 77.65517     | 2.72491      | 0.6048  |
| 2      | 33.188        | BB   | 0.6060      | 1.27614e4    | 327.92426    | 99.3952 |

Totals : 1.28390e4 330.64916

Table 2, Entry 10, Catalyst 3

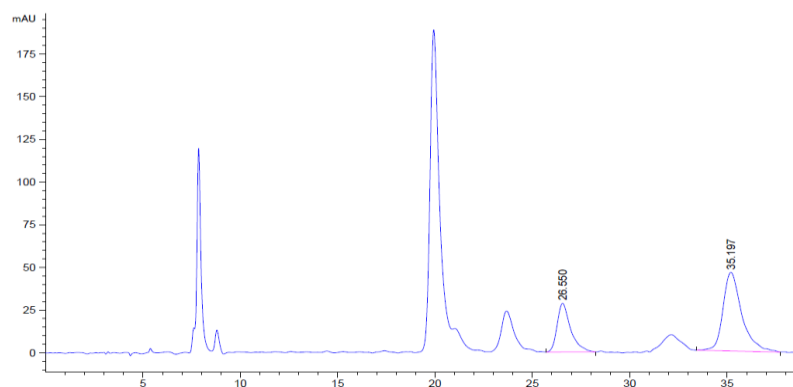

Signal 1: DAD1 A, Sig=254,4 Ref=360,100

| Peak # | RetTime [min] | Type | Width [min] | Area [mAU*s] | Height [mAU] | Area %  |
|--------|---------------|------|-------------|--------------|--------------|---------|
| 1      | 26.550        | BB   | 0.7195      | 1371.31873   | 28.49310     | 30.7020 |
| 2      | 35.197        | BB   | 1.0366      | 3095.22925   | 46.02365     | 69.2980 |

Totals : 4466.54797 74.51674

## 2-[Hydroxy-(4-nitro-phenyl)-methyl]-cyclohexanone

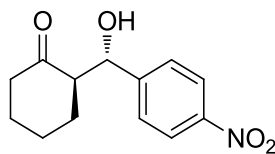

Table 2, Entry 10, Catalyst 4

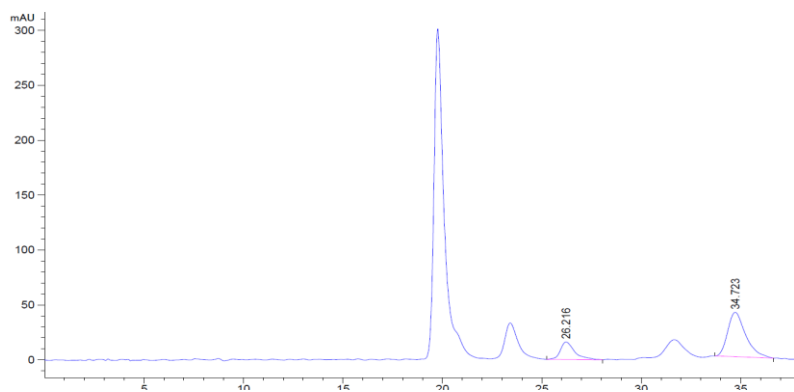

Signal 1: DAD1 A, Sig=254,4 Ref=360,100

| Peak # | RetTime [min] | Type | Width [min] | Area [mAU*s] | Height [mAU] | Area %  |
|--------|---------------|------|-------------|--------------|--------------|---------|
| 1      | 26.216        | BB   | 0.7673      | 804.63885    | 15.98302     | 24.0521 |
| 2      | 34.723        | BB   | 0.9396      | 2540.75708   | 40.40771     | 75.9479 |

Totals : 3345.39594 56.39073

Table 2, Entry 10, Catalyst 5

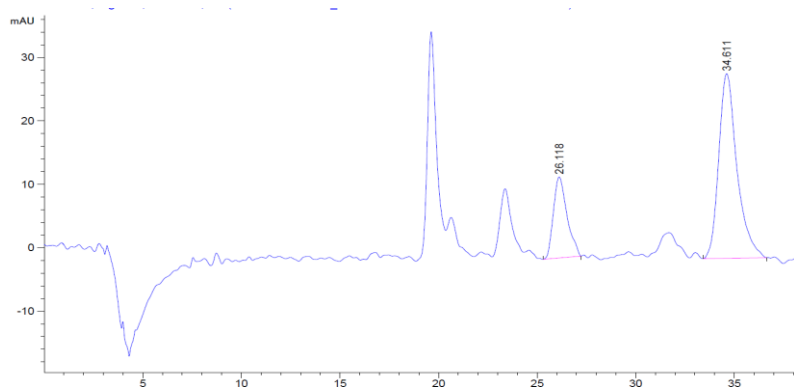

| Peak # | RetTime [min] | Type | Width [min] | Area [mAU*s] | Height [mAU] | Area %  |
|--------|---------------|------|-------------|--------------|--------------|---------|
| 1      | 26.118        | BB   | 0.7301      | 613.33429    | 12.77630     | 24.6328 |
| 2      | 34.611        | BB   | 0.9767      | 1876.57397   | 29.08643     | 75.3672 |

Totals : 2489.90826 41.86273

## 2-[Hydroxy-(4-nitro-phenyl)-methyl]-cyclohexanone



Table 3, Entry 4, Catalyst 16

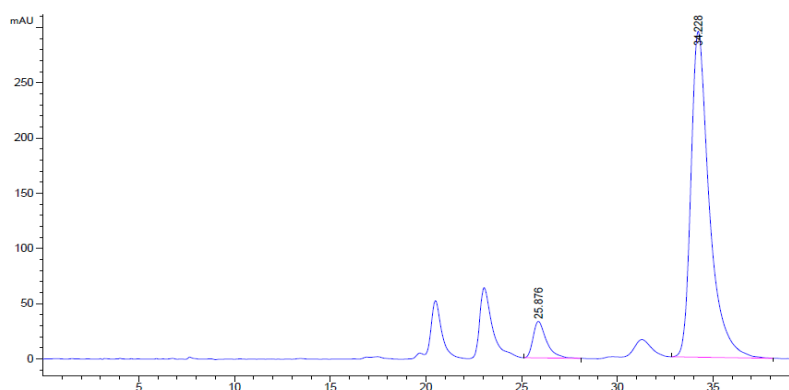

Signal 1: DAD1 C, Sig=260,4 Ref=360,100

| Peak # | RetTime [min] | Type | Width [min] | Area [mAU*s] | Height [mAU] | Area %  |
|--------|---------------|------|-------------|--------------|--------------|---------|
| 1      | 25.876        | BB   | 0.7171      | 1591.80237   | 32.98138     | 7.4970  |
| 2      | 34.228        | BB   | 0.9909      | 1.96408e4    | 294.95438    | 92.5030 |

Totals :                      2.12326e4    327.93575

## 2-[Hydroxy-(3-nitro-phenyl)]-cyclohexanone

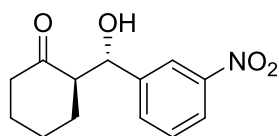

Racemate

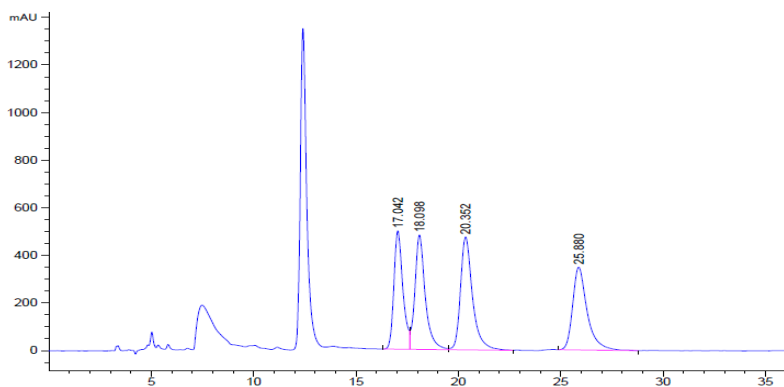

Signal 1: DAD1 C, Sig=260,4 Ref=360,100

| Peak # | RetTime [min] | Type | Width [min] | Area [mAU*s] | Height [mAU] | Area %  |
|--------|---------------|------|-------------|--------------|--------------|---------|
| 1      | 17.042        | BV   | 0.4582      | 1.51797e4    | 497.18906    | 22.1490 |
| 2      | 18.098        | VV   | 0.5206      | 1.69213e4    | 480.75165    | 24.6903 |
| 3      | 20.352        | VB   | 0.6144      | 1.93592e4    | 474.14063    | 28.2475 |
| 4      | 25.880        | BB   | 0.7314      | 1.70740e4    | 347.39310    | 24.9132 |

Totals : 6.85343e4 1799.47443

Table 2, Entry 11, Catalyst 1

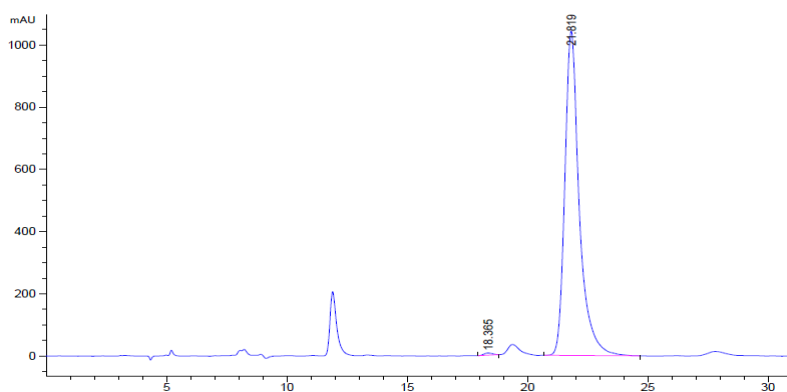

Signal 1: DAD1 A, Sig=254,4 Ref=360,100

| Peak # | RetTime [min] | Type | Width [min] | Area [mAU*s] | Height [mAU] | Area %  |
|--------|---------------|------|-------------|--------------|--------------|---------|
| 1      | 18.365        | BB   | 0.3984      | 169.05835    | 6.93454      | 0.3870  |
| 2      | 21.819        | BB   | 0.6205      | 4.35138e4    | 1043.45776   | 99.6130 |

Totals : 4.36828e4 1050.39230

## 2-[Hydroxy-(3-nitro-phenyl)]-cyclohexanone

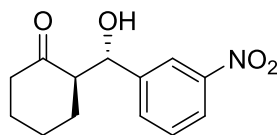

Table 2, Entry 11, Catalyst 2

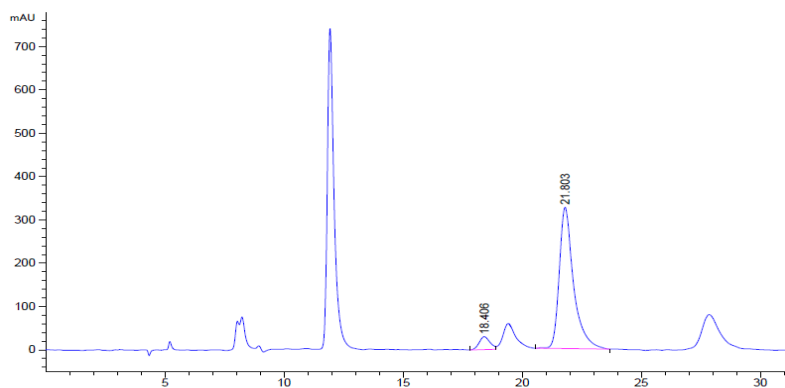

Signal 1: DAD1 A, Sig=254,4 Ref=360,100

| Peak # | RetTime [min] | Type | Width [min] | Area [mAU*s] | Height [mAU] | Area %  |
|--------|---------------|------|-------------|--------------|--------------|---------|
| 1      | 18.406        | BV   | 0.4781      | 940.22955    | 29.79788     | 6.4589  |
| 2      | 21.803        | BB   | 0.6172      | 1.36170e4    | 326.10489    | 93.5411 |

Totals : 1.45572e4 355.90277

Table 2, Entry 11, Catalyst 3

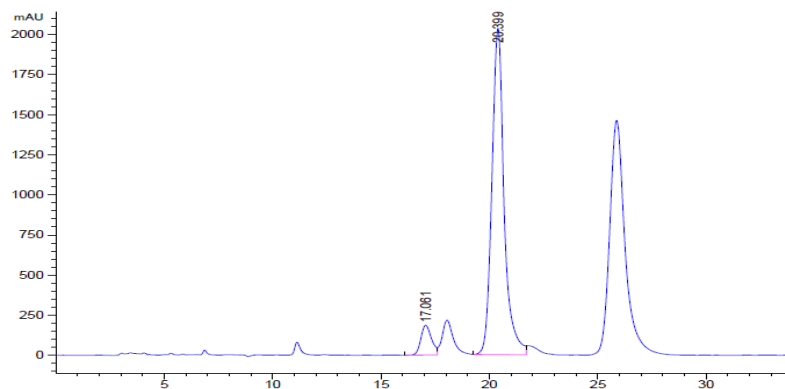

Signal 1: DAD1 A, Sig=254,4 Ref=360,100

| Peak # | RetTime [min] | Type | Width [min] | Area [mAU*s] | Height [mAU] | Area %  |
|--------|---------------|------|-------------|--------------|--------------|---------|
| 1      | 17.061        | BV   | 0.5182      | 6309.92969   | 185.82240    | 7.3616  |
| 2      | 20.399        | BV   | 0.5875      | 7.94043e4    | 2033.93445   | 92.6384 |

Totals : 8.57143e4 2219.75685



## 2-[Hydroxy-(3-nitro-phenyl)]-cyclohexanone



Table 2, Entry 11, Catalyst 4

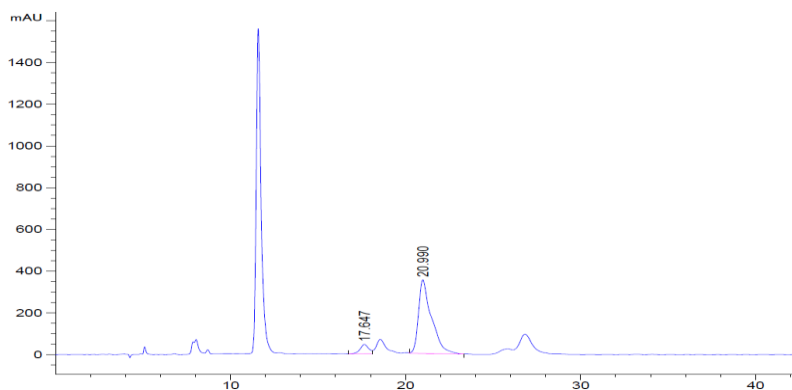

Signal 1: DAD1 C, Sig=260,4 Ref=360,100

| Peak # | RetTime [min] | Type | Width [min] | Area [mAU*s] | Height [mAU] | Area %  |
|--------|---------------|------|-------------|--------------|--------------|---------|
| 1      | 17.647        | BV   | 0.4999      | 1522.50171   | 44.63845     | 7.7328  |
| 2      | 20.990        | VB   | 0.7222      | 1.81665e4    | 353.13251    | 92.2672 |

Totals : 1.96890e4 397.77096

Table 2, Entry 11, Catalyst 5

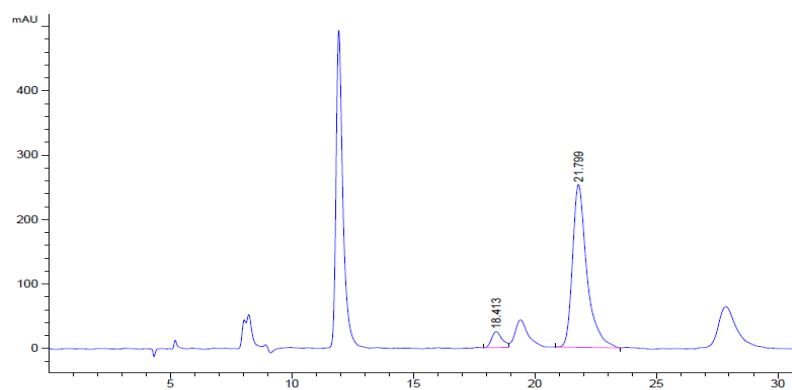

Signal 1: DAD1 A, Sig=254,4 Ref=360,100

| Peak # | RetTime [min] | Type | Width [min] | Area [mAU*s] | Height [mAU] | Area %  |
|--------|---------------|------|-------------|--------------|--------------|---------|
| 1      | 18.413        | BV   | 0.4547      | 750.13171    | 24.81470     | 6.7444  |
| 2      | 21.799        | BB   | 0.6110      | 1.03721e4    | 252.64702    | 93.2556 |

Totals : 1.11222e4 277.46172

## 2-[Hydroxy-(2-nitro-phenyl)-methyl]-cyclohexanone

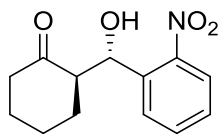

Racemate

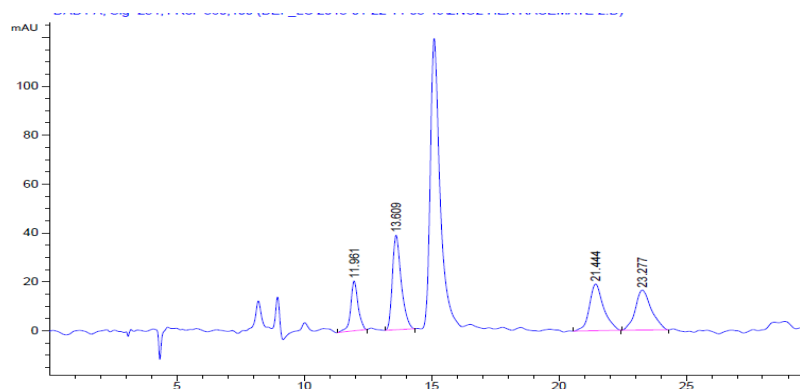

Signal 1: DAD1 A, Sig=254,4 Ref=360,100

| Peak # | RetTime [min] | Type | Width [min] | Area [mAU*s] | Height [mAU] | Area %  |
|--------|---------------|------|-------------|--------------|--------------|---------|
| 1      | 11.961        | BB   | 0.2972      | 411.35648    | 20.40641     | 14.6775 |
| 2      | 13.609        | BB   | 0.3616      | 933.15485    | 38.66509     | 33.2956 |
| 3      | 21.444        | BB   | 0.5713      | 739.95465    | 19.12959     | 26.4021 |
| 4      | 23.277        | BB   | 0.6492      | 718.16852    | 16.39021     | 25.6248 |

Totals : 2802.63449 94.59130

Table 2, Entry 12, Catalyst 1

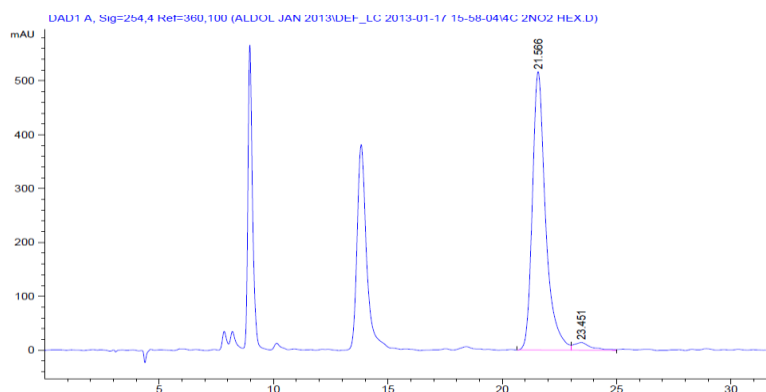

Signal 1: DAD1 A, Sig=254,4 Ref=360,100

| Peak # | RetTime [min] | Type | Width [min] | Area [mAU*s] | Height [mAU] | Area %  |
|--------|---------------|------|-------------|--------------|--------------|---------|
| 1      | 21.566        | BV   | 0.6013      | 2.07832e4    | 516.65967    | 96.4329 |
| 2      | 23.451        | VV   | 0.7305      | 768.77460    | 14.22613     | 3.5671  |

Totals : 2.15520e4 530.88580

## 2-[Hydroxy-(2-nitro-phenyl)-methyl]-cyclohexanone



Table 2, Entry 12, Catalyst 2

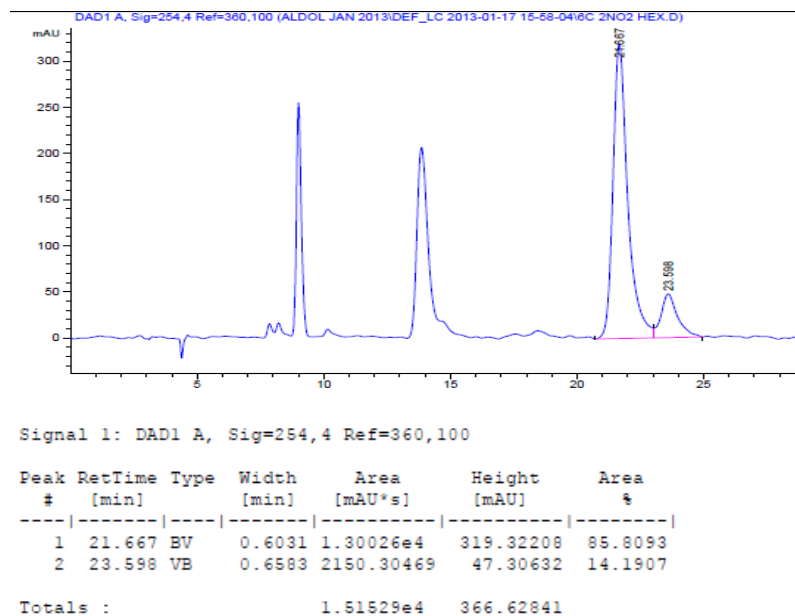

Table 2, Entry 12, Catalyst 3

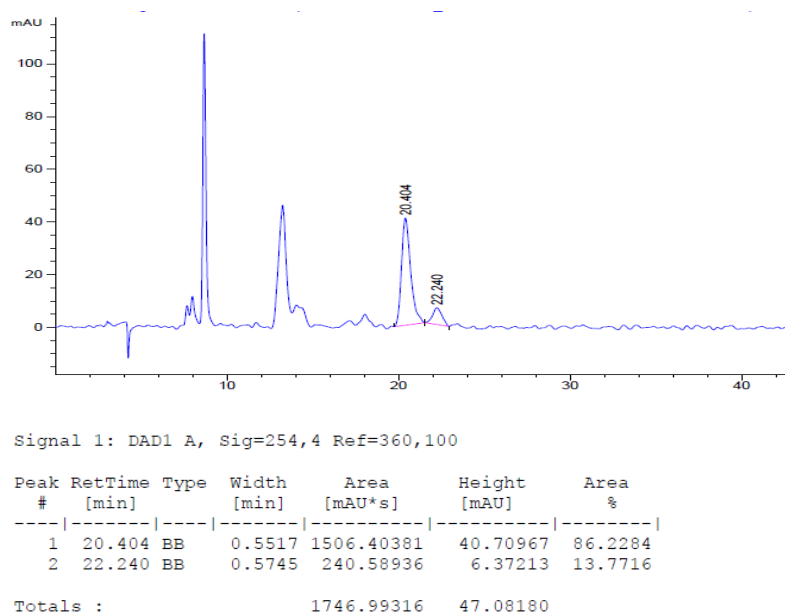

## 2-[Hydroxy-(2-nitro-phenyl)-methyl]-cyclohexanone



Table 2, Entry 12, Catalyst 4

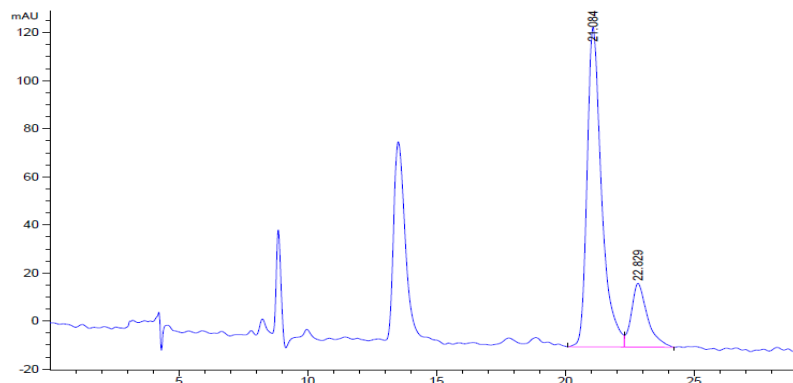

Signal 1: DAD1 A, Sig=254,4 Ref=360,100

| Peak # | RetTime [min] | Type | Width [min] | Area [mAU*s] | Height [mAU] | Area %  |
|--------|---------------|------|-------------|--------------|--------------|---------|
| 1      | 21.084        | BV   | 0.5854      | 5216.42627   | 133.06281    | 81.9128 |
| 2      | 22.829        | VB   | 0.6352      | 1151.83899   | 26.49606     | 18.0872 |

Totals : 6368.26526 159.55886

Table 2, Entry 12, Catalyst 5

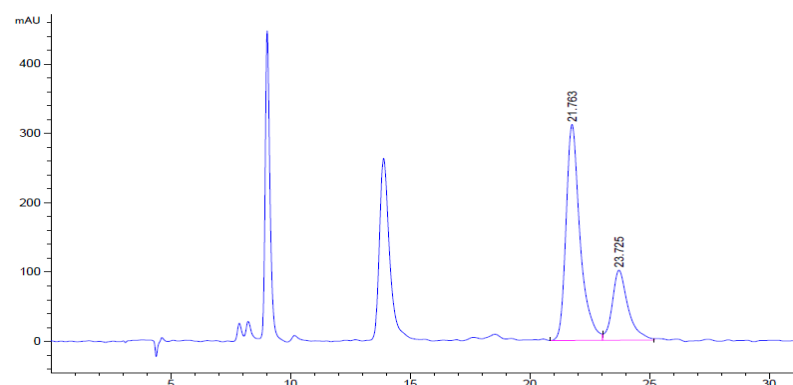

Signal 1: DAD1 A, Sig=254,4 Ref=360,100

| Peak # | RetTime [min] | Type | Width [min] | Area [mAU*s] | Height [mAU] | Area %  |
|--------|---------------|------|-------------|--------------|--------------|---------|
| 1      | 21.763        | BV   | 0.6084      | 1.27194e4    | 311.51456    | 73.2370 |
| 2      | 23.725        | VV   | 0.6807      | 4648.04541   | 101.04308    | 26.7630 |

Totals : 1.73674e4 412.55763

## 2-[Hydroxy-(biphenyl)-methyl]-cyclohexanone

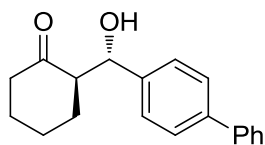

### Racemate

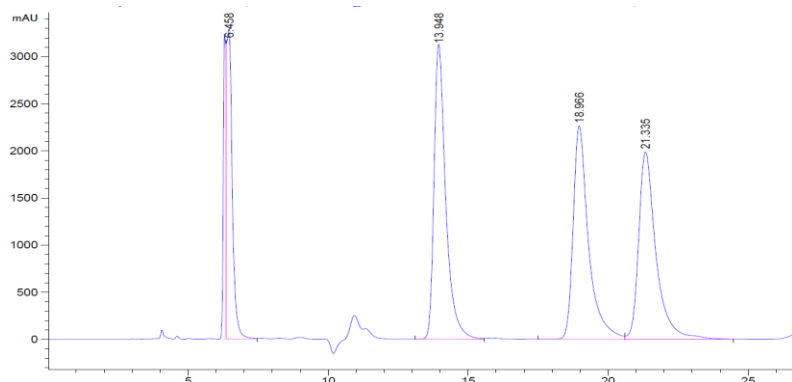

Signal 1: DAD1 A, Sig=254,4 Ref=360,100

| Peak # | RetTime [min] | Type | Width [min] | Area [mAU*s] | Height [mAU] | Area %  |
|--------|---------------|------|-------------|--------------|--------------|---------|
| 1      | 6.458         | VV   | 0.2028      | 4.76873e4    | 3295.32642   | 15.3845 |
| 2      | 13.948        | BV   | 0.4335      | 9.10662e4    | 3129.83057   | 29.3791 |
| 3      | 18.966        | BV   | 0.5596      | 8.60778e4    | 2263.71265   | 27.7698 |
| 4      | 21.335        | VB   | 0.6343      | 8.51379e4    | 1985.50842   | 27.4666 |

Totals : 3.09969e5 1.06744e4

### Table 2, Entry 13, Catalyst 1

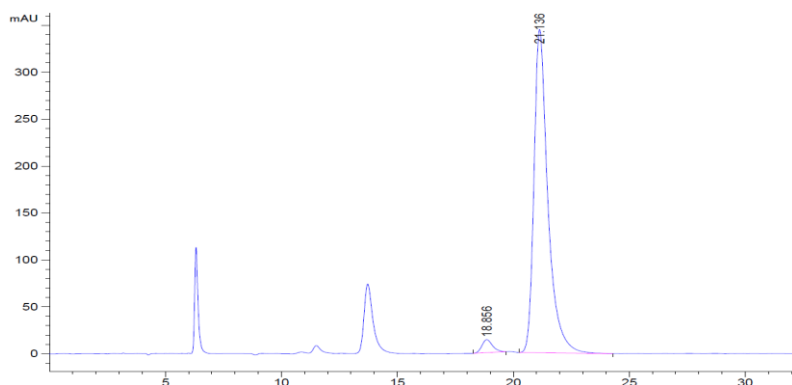

Signal 1: DAD1 A, Sig=254,4 Ref=360,100

| Peak # | RetTime [min] | Type | Width [min] | Area [mAU*s] | Height [mAU] | Area %  |
|--------|---------------|------|-------------|--------------|--------------|---------|
| 1      | 18.856        | BB   | 0.4890      | 440.74829    | 13.85961     | 2.9750  |
| 2      | 21.136        | BB   | 0.6226      | 1.43742e4    | 344.62250    | 97.0250 |

Totals : 1.48150e4 358.48211

## 2-[Hydroxy-(biphenyl)-methyl]-cyclohexanone

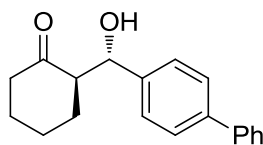

Table 2, Entry 13, Catalyst 2

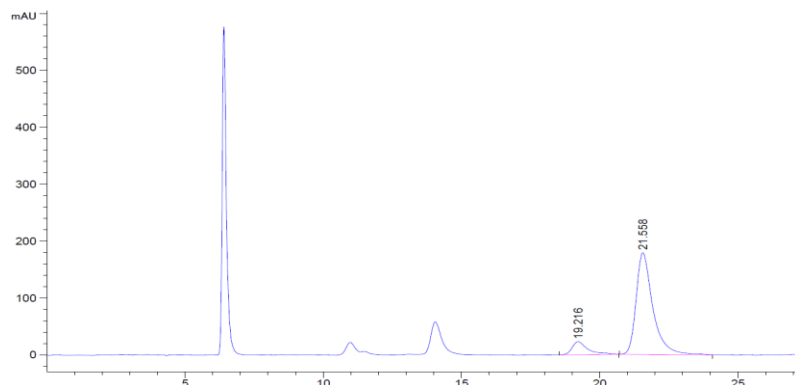

Signal 1: DAD1 A, Sig=254,4 Ref=360,100

| Peak # | RetTime [min] | Type | Width [min] | Area [mAU*s] | Height [mAU] | Area %  |
|--------|---------------|------|-------------|--------------|--------------|---------|
| 1      | 19.216        | BB   | 0.5768      | 906.49841    | 22.85207     | 10.7745 |
| 2      | 21.558        | BB   | 0.6243      | 7506.87402   | 178.62817    | 89.2255 |

Totals : 8413.37244 201.48024

Table 2, Entry 13, Catalyst 3

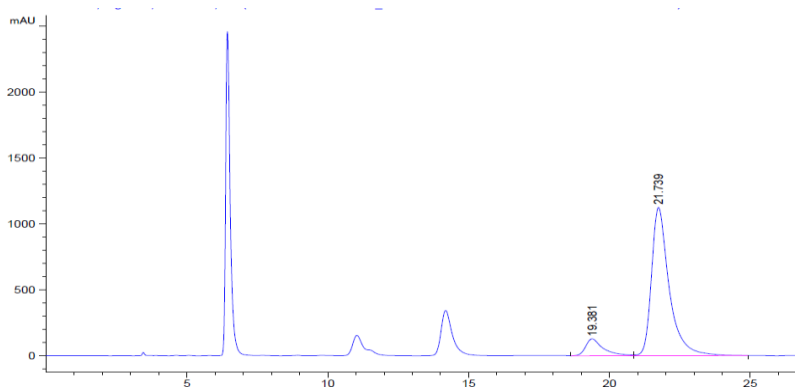

Signal 1: DAD1 A, Sig=254,4 Ref=360,100

| Peak # | RetTime [min] | Type | Width [min] | Area [mAU*s] | Height [mAU] | Area %  |
|--------|---------------|------|-------------|--------------|--------------|---------|
| 1      | 19.381        | BV   | 0.6214      | 5540.06445   | 128.91678    | 10.1401 |
| 2      | 21.739        | VB   | 0.6452      | 4.90952e4    | 1124.92932   | 89.8599 |

Totals : 5.46353e4 1253.84610

## 2-[Hydroxy-(biphenyl)-methyl]-cyclohexanone



Table 2, Entry 13, Catalyst 4

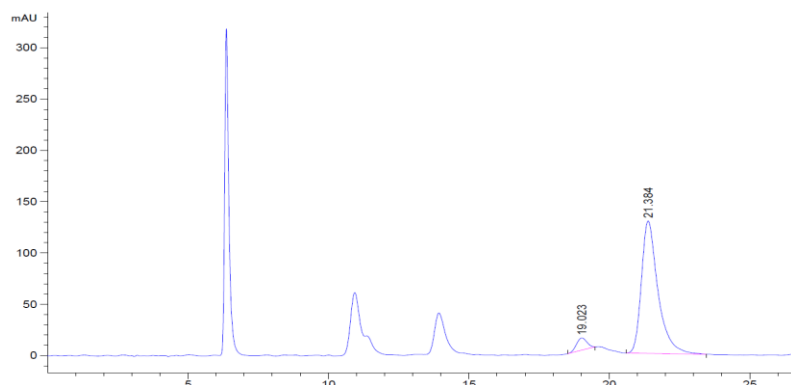

Signal 1: DAD1 A, Sig=254,4 Ref=360,100

| Peak # | RetTime [min] | Type | Width [min] | Area [mAU*s] | Height [mAU] | Area %  |
|--------|---------------|------|-------------|--------------|--------------|---------|
| 1      | 19.023        | BB   | 0.4058      | 305.20236    | 11.87754     | 5.4608  |
| 2      | 21.384        | BB   | 0.6096      | 5283.76855   | 129.06317    | 94.5392 |

Totals : 5588.97092 140.94071

Table 2, Entry 13, Catalyst 5

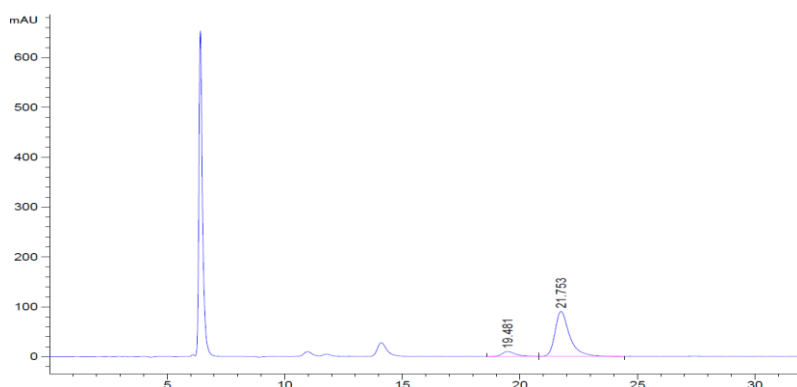

Signal 1: DAD1 A, Sig=254,4 Ref=360,100

| Peak # | RetTime [min] | Type | Width [min] | Area [mAU*s] | Height [mAU] | Area %  |
|--------|---------------|------|-------------|--------------|--------------|---------|
| 1      | 19.481        | BB   | 0.6091      | 413.47549    | 10.02655     | 9.5607  |
| 2      | 21.753        | BB   | 0.6450      | 3911.26953   | 90.35899     | 90.4393 |

Totals : 4324.74503 100.38555

## 2-[Hydroxy-(3-benzyloxy-phenyl)]-4-tert-butyl-cyclohexanone

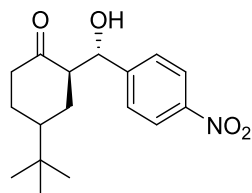

### Racemate

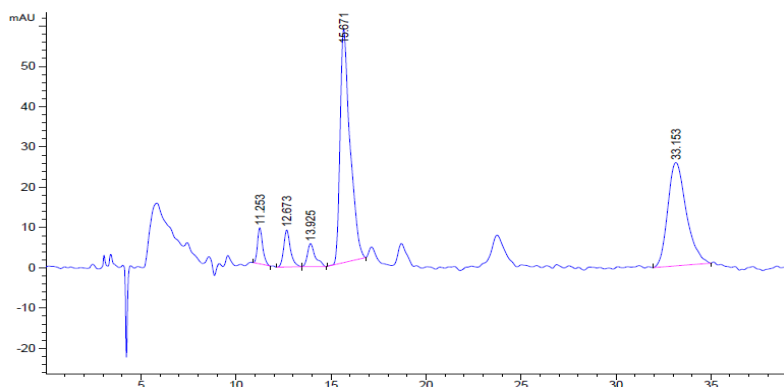

Signal 1: DAD1 F, Sig=273,4 Ref=360,100

| Peak # | RetTime [min] | Type | Width [min] | Area [mAU*s] | Height [mAU] | Area %  |
|--------|---------------|------|-------------|--------------|--------------|---------|
| 1      | 11.253        | BB   | 0.2874      | 168.63976    | 8.96678      | 3.8248  |
| 2      | 12.673        | BB   | 0.3644      | 225.69682    | 9.19358      | 5.1189  |
| 3      | 13.925        | BB   | 0.4192      | 162.36644    | 5.68507      | 3.6826  |
| 4      | 15.671        | BB   | 0.5253      | 2106.50537   | 58.05650     | 47.7767 |
| 5      | 33.153        | BB   | 1.0182      | 1745.85144   | 25.64532     | 39.5969 |

Totals : 4409.05983 107.54725

### Table 5, Entry 4, Catalyst 1

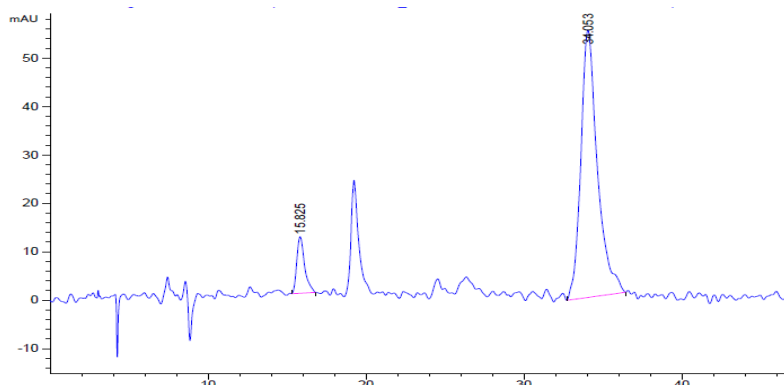

Signal 1: DAD1 A, Sig=254,4 Ref=360,100

| Peak # | RetTime [min] | Type | Width [min] | Area [mAU*s] | Height [mAU] | Area %  |
|--------|---------------|------|-------------|--------------|--------------|---------|
| 1      | 15.825        | BB   | 0.5270      | 403.42197    | 11.67810     | 9.0940  |
| 2      | 34.053        | BB   | 1.0658      | 4032.69409   | 55.23366     | 90.9060 |

Totals : 4436.11606 66.91176



Table 4: Evaluation of diprolinamides 1-5 - Alternate aldehydes

| Entry | Aldehyde                                                                            | Conv (%) <sup>a</sup> | dr<br><i>syn/anti</i> <sup>a</sup> | ee <sup>b</sup> |
|-------|-------------------------------------------------------------------------------------|-----------------------|------------------------------------|-----------------|
| 1     | 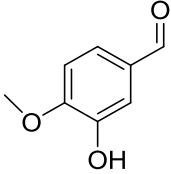   | nr                    | -                                  | -               |
| 2     |    | 14                    | 47/53                              | N.D.            |
| 3     |    | trace                 | -                                  | -               |
| 4     |   | nr                    | -                                  | -               |
| 5     |  | nr                    | -                                  | -               |

[a] Determined by integration of key signals in the <sup>1</sup>H NMR spectrum.

[b] Determined by Chiral HPLC, Chiralpak AD-H, 1mL/min, IPA/Hexane, 1:9.

Table 5: Evaluation of diprolinamides 1-5 - Alternate ketones

| Entry          | Ketone                                                                             | Conv (%) <sup>a</sup> | dr<br><i>syn/anti</i> <sup>a</sup> | ee <sup>b</sup> |
|----------------|------------------------------------------------------------------------------------|-----------------------|------------------------------------|-----------------|
| 1              | 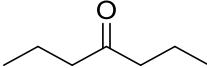  | <1%                   | -                                  | -               |
| 2              |   | 7%                    | 41                                 | N.D.            |
| 3              |   | <1%                   | -                                  | -               |
| 4 <sup>5</sup> |   | 34%                   | 85                                 | 82              |
| 5              |  |                       |                                    |                 |

[a] Determined by integration of key signals in the <sup>1</sup>H NMR spectrum.

[b] Determined by Chiral HPLC, Chiralpak AD-H, 1mL/min, IPA/Hexane, 1:9.

## References

- 1 Opalka SM, Steinbacher JL, Lambiris BA, McQuade DT. Thiourea/Proline Derivative-Catalyzed Synthesis of Tetrahydrofuran Derivatives: A Mechanistic View. *The Journal of Organic Chemistry* 2011; 76: 6503-6517.
- 2 Delaney JP, Henderson LC. Investigating Ionic Effects Applied to Water Based Organocatalysed Aldol Reactions. *International Journal of Molecular Sciences* 2011; 12: 9083-9094.
- 3 Delaney JP, Henderson LC. Direct Asymmetric Aldol Reactions in Water Catalysed by a Highly Active C2-Symmetrical Bisprolinamide Organocatalyst. *Advanced Synthesis & Catalysis* 2012; 354: 197-204.
4. (a) Kanemitsu T, Umehara A, Miyazaki M, Nagata K, Itoh T. *European Journal of Organic Chemistry* 2011; 2011: 993-997. (b) Li S, Wu C, Long X, Fu X, Chen G, Liu Z. Simple proline derivatives as recoverable catalysts for the large-scale stoichiometric aldol reactions. *Catalysis Science & Technology* 2012; 2: 1068-1071. (c) Hayashi K, Kogiso H, Sano S, Nagao Y. Variable Stereoselectivity in the Imine Aldol Reactions Employing MgBr<sub>2</sub> and Et<sub>3</sub>N. *Synlett* 1996; 1996: 1203-1205; (d) Gruttadauria M, Bivona LA, Lo Meo P, Riela S, Noto R. *European Journal of Organic Chemistry* 2012; 2012: 2635-2642.
- 5 Clegg W, Harrington RW, North M, Pizzato F, Villuendas P. Cyclic carbonates as sustainable solvents for proline-catalysed aldol reactions. *Tetrahedron: Asymmetry* 2010; 21: 1262-1271.
